# Supplementary material for: Factors Associated With Child Stunting, Wasting, and Underweight in 35 Low- and Middle-Income Countries
Source: PubMed Central journal article supplement (PMC7177203; doi:10.1001/jamanetworkopen.2020.3386), 2020-04-22

## Supplementary Online Content

Li Z, Kim R, Vollmer S, Subramanian SV. Factors associated with child stunting, wasting, and underweight in 35 low- and middle-income countries. *JAMA Netw Open*. 2020;3(4):e203386. doi:10.1001/jamanetworkopen.2020.3386

**eTable 1.** Percentage of Children Aged 12 to 59 Months Classified as Having Stunting, Underweight, or Wasting in 35 Countries

**eTable 2.** Full Regression Results From the Pooled, Fully Adjusted Model

**eTable 3.** Magnitudes of 20 Factors Associated With Child Anthropometric Failures From Fully Adjusted Models for the Pooled Sample

**eFigure 1.** Flow Diagram Showing Exclusions and Final Sample Sizes of the Study Population, Using the Most Recent Pooled Demographic Health Survey Data Since 2010

**eFigure 2.** Relative Ranking of 20 Factors Associated With Child Anthropometric Failures From Single Adjusted Models for the Pooled Sample

**eFigure 3.** Country-Specific Ranking of 20 Factors Associated With Child Anthropometric Failures From Fully Adjusted Models on Underweight

**eFigure 4.** Country-Specific Odds Ratios for 20 Factors Associated With Child Anthropometric Failures From Fully Adjusted Models on Underweight

**eFigure 5.** Country-Specific Ranking of 20 Factors Associated With Child Anthropometric Failures From Fully Adjusted Models on Wasting

**eFigure 6.** Country-Specific Odds Ratios for 20 Factors Associated With Child Anthropometric Failures From Fully Adjusted Models on Wasting

**eFigure 7.** Relative Ranking of 23 Factors Associated With Child Anthropometric Failures From Supplementary Analysis of Fully Adjusted Models for the Pooled Sample

**eFigure 8.** Country-Specific Ranking of 23 Factors Associated With Child Anthropometric Failures From Supplementary Analysis of Fully Adjusted Models on Stunting, Underweight, and Wasting in 12 Countries

**eFigure 9.** Country-Specific Odds Ratios for 23 Factors Associated With Child Anthropometric Failures From Supplementary Analysis of Fully Adjusted Models on Stunting, Underweight, and Wasting in 12 Countries

**eFigure 10.** Relative Ranking of 20 Factors Associated With Child Anthropometric Failures From Fully Adjusted Models for Pooled Sample, Stratified by Children's Age

**eFigure 11.** Country-Specific Ranking of 20 Factors Associated With Child Anthropometric Failures From Fully Adjusted Models, Stratified by Children's Age

**eFigure 12.** Country-Specific Odds Ratios for 20 Factors Associated With Child Anthropometric Failures From Fully Adjusted Models, Stratified by Children's Age

**eFigure 13.** Relative Ranking of 20 Factors Associated With Child Anthropometric Failures From Fully Adjusted Models for Pooled Sample, Stratified by Place of Residence

**eFigure 14.** Country-Specific Ranking of 20 Factors Associated With Child Anthropometric Failures From Fully Adjusted Models, Stratified by Place of Residence

**eFigure 15.** Country-Specific Odds Ratios for 20 Factors Associated With Child Anthropometric Failures From Fully Adjusted Models, Stratified by Place of Residence

**eFigure 16.** Relative Ranking of 17 Factors Associated With Child Anthropometric Failures From Fully Adjusted Models for the Pooled Sample, Excluding Source of Drinking Water, Sanitation Facility, and Household Air Quality

**eFigure 17.** Country-Specific Ranking of 17 Factors Associated With Child Anthropometric Failures From Fully Adjusted Models for the Pooled Sample, Excluding Source of Drinking Water, Sanitation Facility, and Household Air Quality

**eFigure 18.** Country-Specific Odds Ratios for 17 Factors Associated With Child Anthropometric Failures From Fully Adjusted Models for the Pooled Sample, Excluding Source of Drinking Water, Sanitation Facility, and Household Air Quality

**eFigure 19.** Relative Ranking of 23 Factors Associated With Child Anthropometric Failures From Fully Adjusted Models for the Pooled Sample, Adding Women's Empowerment Factors

This supplementary material has been provided by the authors to give readers additional information about their work.

**eTable 1. Percentage of Children Aged 12 to 59 Months Classified as Having Stunting, Underweight, or Wasting in 35 Countries**

| Country                      | Year | Stunting (%)     | Underweight (%)  | Wasting (%)      |
|------------------------------|------|------------------|------------------|------------------|
| Benin                        | 2018 | 34.6(33.6, 35.7) | 15.8(15.0, 16.6) | 3.9(3.5, 4.3)    |
| Burkina Faso                 | 2010 | 38.9(37.5, 40.4) | 25.3(24.0, 26.6) | 12.0(11.0, 13.0) |
| Burundi                      | 2016 | 61.1(59.6, 62.6) | 31.4(30.0, 32.8) | 4.5(3.9, 5.2)    |
| Cameroon                     | 2011 | 36.5(34.8, 38.2) | 15.0(13.8, 16.3) | 4.7(4.0, 5.4)    |
| Chad                         | 2015 | 47.5(46.3, 48.6) | 32.7(31.6, 33.8) | 12.3(11.6, 13.1) |
| Comoros                      | 2012 | 31.4(29.3, 33.5) | 15.7(14.0, 17.4) | 9.5(8.1, 10.8)   |
| Cote d'Ivoire                | 2012 | 32.7(30.6, 34.7) | 14.3(12.8, 15.8) | 5.8(4.8, 6.8)    |
| Democratic Republic of Congo | 2013 | 48.3(47.0, 49.7) | 24.2(23.0, 25.4) | 6.3(5.6, 7.0)    |
| Ethiopia                     | 2016 | 44.4(43.1, 45.7) | 25.0(23.9, 26.1) | 8.7(8.0, 9.4)    |
| Gambia                       | 2013 | 26.3(24.3, 28.2) | 16.5(14.9, 18.1) | 10.4(9.1, 11.8)  |
| Ghana                        | 2014 | 19.9(18.1, 21.8) | 10.5(9.1, 11.9)  | 3.6(2.7, 4.4)    |
| Guinea                       | 2018 | 33.3(31.3, 35.2) | 15.5(14.0, 17.0) | 8.1(7.0, 9.2)    |
| Haiti                        | 2017 | 21.8(20.5, 23.1) | 8.1(7.2, 8.9)    | 2.5(2.0, 3.0)    |
| India                        | 2015 | 41.4(41.2, 41.7) | 36.9(36.7, 37.2) | 19.0(18.8, 19.2) |
| Kenya                        | 2014 | 28.6(27.9, 29.4) | 11.4(10.9, 12.0) | 3.7(3.4, 4.1)    |
| Kyrgyzstan                   | 2012 | 19.5(18.0, 21.0) | 2.9(2.3, 3.5)    | 2.0(1.5, 2.6)    |
| Lesotho                      | 2014 | 36.1(33.0, 39.2) | 11.2(9.2, 13.2)  | 2.6(1.5, 3.6)    |
| Liberia                      | 2013 | 34.4(32.4, 36.3) | 14.8(13.3, 16.2) | 4.9(4.0, 5.8)    |
| Malawi                       | 2015 | 39.4(37.8, 41.0) | 11.4(10.4, 12.4) | 2.6(2.1, 3.1)    |
| Mali                         | 2018 | 30.1(28.9, 31.3) | 18.9(17.9, 20.0) | 7.9(7.3, 8.6)    |
| Mozambique                   | 2011 | 45.7(44.5, 47.0) | 14.1(13.3, 15.0) | 4.8(4.3, 5.4)    |
| Myanmar                      | 2016 | 32.1(30.5, 33.8) | 20.1(18.7, 21.6) | 6.4(5.6, 7.3)    |
| Namibia                      | 2013 | 25.2(22.7, 27.7) | 14.3(12.3, 16.3) | 5.6(4.3, 6.9)    |
| Nepal                        | 2016 | 40.7(38.4, 43.0) | 29.2(27.1, 31.4) | 8.4(7.1, 9.7)    |
| Niger                        | 2012 | 48.6(46.9, 50.4) | 37.5(35.8, 39.2) | 16.1(14.8, 17.4) |
| Peru                         | 2012 | 18.8(17.9, 19.8) | 3.2(2.8, 3.7)    | 0.6(0.4, 0.8)    |
| São Tomé and Príncipe        | 2008 | 26.9(24.1, 29.6) | 13.0(10.9, 15.0) | 11.3(9.3, 13.2)  |
| Sierra Leone                 | 2013 | 41.0(39.2, 42.8) | 15.7(14.3, 17.0) | 8.1(7.1, 9.1)    |
| Swaziland                    | 2007 | 30.4(28.0, 32.8) | 4.8(3.7, 5.9)    | 2.2(1.4, 2.9)    |
| Tajikistan                   | 2017 | 20.2(19.0, 21.4) | 6.9(6.1, 7.6)    | 4.1(3.5, 4.7)    |
| Tanzania                     | 2015 | 38.3(37.0, 39.5) | 14.3(13.4, 15.2) | 3.8(3.4, 4.3)    |
| Togo                         | 2014 | 29.5(27.6, 31.4) | 16.4(14.8, 18.0) | 5.2(4.3, 6.2)    |
| Uganda                       | 2016 | 31.7(30.0, 33.4) | 9.9(8.8, 11.0)   | 2.3(1.8, 2.9)    |
| Zambia                       | 2013 | 43.6(42.6, 44.6) | 15.3(14.6, 16.1) | 5.3(4.8, 5.7)    |
| Zimbabwe                     | 2015 | 28.0(26.6, 29.5) | 7.9(7.0, 8.8)    | 2.8(2.3, 3.4)    |

**eTable 2. Full Regression Results From the Pooled, Fully Adjusted Model**

|                                                                             | <b>Stunting</b>     | <b>Underweight</b>  | <b>Wasting</b>      |
|-----------------------------------------------------------------------------|---------------------|---------------------|---------------------|
|                                                                             | <b>b/se</b>         | <b>b/se</b>         | <b>b/se</b>         |
| <b>Child age (reference group: 48-59 months old)</b>                        |                     |                     |                     |
| 12-23 months old                                                            | 0.928***<br>(0.027) | 0.704***<br>(0.023) | 1.278***<br>(0.057) |
| 24-35 months old                                                            | 1.232***<br>(0.023) | 0.897***<br>(0.018) | 1.009<br>(0.027)    |
| 36-47 months old                                                            | 1.160***<br>(0.019) | 0.931***<br>(0.017) | 0.961<br>(0.024)    |
| <b>Child is a female (reference group: male)</b>                            | 0.885***<br>(0.010) | 0.942***<br>(0.012) | 0.873***<br>(0.014) |
| <b>Maternal age at birth (year)</b>                                         | 0.995***<br>(0.001) | 0.996***<br>(0.001) | 1.000<br>(0.002)    |
| <b>Birth order (reference group: 1st birth in the household)</b>            |                     |                     |                     |
| 2nd birth in the household                                                  | 1.008<br>(0.057)    | 0.867**<br>(0.056)  | 0.837**<br>(0.071)  |
| 3rd birth in the household                                                  | 0.726***<br>(0.047) | 0.681***<br>(0.050) | 0.794**<br>(0.077)  |
| 4th birth in the household                                                  | 0.553***<br>(0.079) | 0.553***<br>(0.083) | 0.84<br>(0.165)     |
| 5th birth in the household                                                  | 1.671<br>(0.856)    | 1.312<br>(0.730)    | 1.657<br>(1.120)    |
| 6th birth in the household                                                  | 1.012<br>(0.892)    | 0.863<br>(0.830)    | 3.456<br>(4.090)    |
| <b>Child lives in the rural (reference group: child lives in the urban)</b> | 0.979<br>(0.018)    | 0.907***<br>(0.019) | 0.885***<br>(0.023) |
| <b>Household wealth (reference group: richest)</b>                          |                     |                     |                     |
| Poorest                                                                     | 1.700***<br>(0.051) | 1.639***<br>(0.059) | 1.171***<br>(0.054) |
| Poorer                                                                      | 1.514***<br>(0.042) | 1.465***<br>(0.050) | 1.078*<br>(0.047)   |
| Middle                                                                      | 1.390***<br>(0.037) | 1.329***<br>(0.043) | 1.016<br>(0.040)    |
| Richer                                                                      | 1.205***<br>(0.030) | 1.188***<br>(0.035) | 0.992<br>(0.038)    |
| <b>Maternal education (reference group: college and above)</b>              |                     |                     |                     |
| No schooling                                                                | 1.913***<br>(0.064) | 1.837***<br>(0.070) | 1.241***<br>(0.054) |
| Primary education                                                           | 1.682***<br>(0.056) | 1.558***<br>(0.059) | 1.113**<br>(0.049)  |
| Secondary education                                                         | 1.318***<br>(0.042) | 1.341***<br>(0.049) | 1.175***<br>(0.045) |
| <b>Maternal height (reference group: 160+cm)</b>                            |                     |                     |                     |
| <145cm (short maternal height)                                              | 4.718***<br>(0.142) | 3.479***<br>(0.106) | 1.153***<br>(0.044) |

|                                                                                       |          |          |          |
|---------------------------------------------------------------------------------------|----------|----------|----------|
| 145-149.9 cm                                                                          | 3.009*** | 2.567*** | 1.187*** |
|                                                                                       | (0.067)  | (0.064)  | (0.038)  |
| 150-154.9 cm                                                                          | 2.118*** | 1.816*** | 1.106*** |
|                                                                                       | (0.041)  | (0.040)  | (0.033)  |
| 155-159.9 cm                                                                          | 1.516*** | 1.396*** | 1.080*** |
|                                                                                       | (0.028)  | (0.031)  | (0.032)  |
| <b>Maternal BMI (reference group: 25+ kg/m2)</b>                                      |          |          |          |
| <18.5 kg/m2 (low maternal BMI)                                                        | 1.643*** | 2.719*** | 2.281*** |
|                                                                                       | (0.036)  | (0.071)  | (0.079)  |
| 18.5-24.9 kg/m2                                                                       | 1.301*** | 1.568*** | 1.529*** |
|                                                                                       | (0.023)  | (0.036)  | (0.048)  |
| <b>Child marriage</b>                                                                 | 1.038*** | 1.009    | 0.969*   |
|                                                                                       | (0.013)  | (0.014)  | (0.017)  |
| <b>Delivered with skilled birth attendant</b>                                         | 1.155*** | 1.154*** | 1.008    |
|                                                                                       | (0.016)  | (0.018)  | (0.020)  |
| <b>Family planning need satisfied</b>                                                 | 1.031**  | 1.008    | 0.957**  |
|                                                                                       | (0.013)  | (0.014)  | (0.017)  |
| <b>Dietary diversity score (reference group: richest)</b>                             |          |          |          |
| Poor                                                                                  | 1.222*** | 1.336*** | 1.200*** |
|                                                                                       | (0.032)  | (0.041)  | (0.049)  |
| Relatively poor                                                                       | 1.095*** | 1.240*** | 1.190*** |
|                                                                                       | (0.031)  | (0.040)  | (0.050)  |
| Middle                                                                                | 1.127*** | 1.190*** | 1.079*   |
|                                                                                       | (0.031)  | (0.038)  | (0.045)  |
| Relatively rich                                                                       | 1.091*** | 1.116*** | 1.072    |
|                                                                                       | (0.032)  | (0.040)  | (0.047)  |
| <b>Delayed breastfeeding</b>                                                          | 1.037*** | 0.983    | 0.937*** |
|                                                                                       | (0.013)  | (0.014)  | (0.016)  |
| <b>Caught by infectious disease in past 2 weeks</b>                                   | 1.039*   | 1.039*   | 0.969    |
|                                                                                       | (0.021)  | (0.024)  | (0.030)  |
| <b>Not fully vaccinated</b>                                                           | 1.041*** | 1.047*** | 1.005    |
|                                                                                       | (0.013)  | (0.015)  | (0.019)  |
| <b>Oral rehydration therapy for children diarrhea (reference group: no diarrhea)</b>  |          |          |          |
| Had diarrhea and used oral rehydration therapy                                        | 1.150*** | 1.236*** | 1.195*** |
|                                                                                       | (0.030)  | (0.038)  | (0.046)  |
| Had diarrhea but did not oral rehydration therapy                                     | 1.096*** | 1.246*** | 1.165*** |
|                                                                                       | (0.030)  | (0.038)  | (0.049)  |
| <b>Care seeking for suspected pneumonia (reference group: no suspected pneumonia)</b> |          |          |          |
| With suspected pneumonia and sought for care for it                                   | 0.936**  | 0.949*   | 0.946    |
|                                                                                       | (0.025)  | (0.027)  | (0.037)  |
| With suspected pneumonia, but did not seek for care for it                            | 0.958    | 0.951    | 0.932    |
|                                                                                       | (0.028)  | (0.032)  | (0.043)  |
| <b>Antenatal care (reference group: had eight or more antenatal care visits)</b>      |          |          |          |
| Less than four antenatal care visits                                                  | 1.152*** | 1.112*** | 0.959    |
|                                                                                       | (0.029)  | (0.031)  | (0.033)  |

|                                          |          |          |          |
|------------------------------------------|----------|----------|----------|
| Four to seven antenatal care visits      | 0.998    | 1.010    | 0.951    |
|                                          | (0.026)  | (0.030)  | (0.034)  |
| <b>Not received vitamin A supplement</b> | 0.996    | 1.027*   | 1.040**  |
|                                          | (0.014)  | (0.015)  | (0.020)  |
| <b>Unsafe water</b>                      | 0.974*   | 0.991    | 1.071*** |
|                                          | (0.015)  | (0.017)  | (0.026)  |
| <b>Unimproved sanitation</b>             | 1.098*** | 1.091*** | 1.085*** |
|                                          | (0.017)  | (0.020)  | (0.026)  |
| <b>Unsafe stool disposal</b>             | 1.060*** | 1.091*** | 1.008    |
|                                          | (0.016)  | (0.019)  | (0.024)  |
| <b>High indoor pollution</b>             | 1.055*** | 1.012    | 0.996    |
|                                          | (0.021)  | (0.024)  | (0.027)  |
| <b>Not used iodized salt</b>             | 0.982    | 0.953**  | 0.940**  |
|                                          | (0.020)  | (0.021)  | (0.027)  |
| <b>Country dummies</b>                   | Included | Included | Included |
| <b>_cons</b>                             | 0.113*** | 0.028*** | 0.020*** |
|                                          | (0.009)  | (0.003)  | (0.003)  |

**eTable 3. Magnitudes of 20 Factors Associated With Child Anthropometric Failures From Fully Adjusted Models for the Pooled Sample In three settings: original) controlling only for the 20 factors listed below (n=299,353), sensitivity test 1) controlling for the 20 factors listed below, as well as child birth weight and preceding birth interval (n=128,902), sensitivity test 2) controlling for the 20 factors listed below, as well as women's empowerment (n=142,638)**

| Factor                         | Stunting         |                    |                    | Underweight      |                    |                    | Wasted           |                    |                    |
|--------------------------------|------------------|--------------------|--------------------|------------------|--------------------|--------------------|------------------|--------------------|--------------------|
|                                | Original result  | Sensitivity test 1 | Sensitivity test 2 | Original result  | Sensitivity test 1 | Sensitivity test 2 | Original result  | Sensitivity test 1 | Sensitivity test 2 |
| Short maternal stature         | 4.72(4.45, 5.01) | 4.71(4.34, 5.11)   | 4.96(4.53, 5.44)   | 3.48(3.28, 3.69) | 3.32(3.04, 3.63)   | 3.75(3.42, 4.12)   | 1.15(1.07, 1.24) | 1.12(1.00, 1.25)   | 1.24(1.09, 1.41)   |
| Lack of maternal education     | 1.91(1.79, 2.04) | 1.76(1.60, 1.94)   | 2.03(1.83, 2.25)   | 1.84(1.71, 1.98) | 1.64(1.47, 1.83)   | 1.96(1.70, 2.25)   | 1.24(1.14, 1.35) | 1.28(1.13, 1.46)   | 1.26(1.07, 1.48)   |
| Poorest HH wealth              | 1.70(1.60, 1.80) | 1.72(1.58, 1.87)   | 1.78(1.65, 1.93)   | 1.64(1.53, 1.76) | 1.64(1.47, 1.82)   | 1.55(1.41, 1.70)   | 1.17(1.07, 1.28) | 1.08(0.95, 1.23)   | 1.11(0.98, 1.27)   |
| Low maternal BMI               | 1.64(1.57, 1.71) | 1.55(1.46, 1.65)   | 1.64(1.54, 1.74)   | 2.72(2.58, 2.86) | 2.54(2.36, 2.73)   | 3.14(2.92, 3.38)   | 2.28(2.13, 2.44) | 2.04(1.85, 2.24)   | 2.34(2.11, 2.60)   |
| Poor dietary diversity         | 1.22(1.16, 1.29) | 1.16(1.07, 1.25)   | 1.25(1.18, 1.34)   | 1.34(1.26, 1.42) | 1.32(1.20, 1.45)   | 1.30(1.20, 1.41)   | 1.20(1.11, 1.30) | 1.29(1.14, 1.46)   | 1.20(1.07, 1.35)   |
| No SBA                         | 1.15(1.12, 1.19) | 1.05(1.00, 1.11)   | 1.18(1.13, 1.22)   | 1.15(1.12, 1.19) | 1.08(1.01, 1.14)   | 1.21(1.15, 1.27)   | 1.01(0.97, 1.05) | 1.07(0.99, 1.16)   | 1.07(1.00, 1.14)   |
| Less than four ANC visits      | 1.15(1.10, 1.21) | 1.12(1.05, 1.20)   | 1.07(0.99, 1.15)   | 1.11(1.05, 1.17) | 1.05(0.97, 1.12)   | 1.03(0.93, 1.13)   | 0.96(0.90, 1.03) | 0.87(0.80, 0.94)   | 1.01(0.88, 1.14)   |
| Unimproved sanitation          | 1.10(1.06, 1.13) | 1.05(1.01, 1.10)   | 1.11(1.06, 1.15)   | 1.09(1.05, 1.13) | 1.09(1.04, 1.15)   | 1.09(1.04, 1.15)   | 1.08(1.04, 1.14) | 1.13(1.06, 1.21)   | 1.09(1.02, 1.18)   |
| Had diarrhea, but not used ORT | 1.10(1.04, 1.16) | 1.09(1.00, 1.19)   | 1.07(1.00, 1.14)   | 1.25(1.17, 1.32) | 1.11(1.00, 1.23)   | 1.26(1.17, 1.36)   | 1.17(1.07, 1.26) | 1.06(0.93, 1.22)   | 1.34(1.20, 1.50)   |
| Unsafe stool disposal          | 1.06(1.03, 1.09) | 1.09(1.04, 1.14)   | 1.02(0.98, 1.06)   | 1.09(1.05, 1.13) | 1.11(1.06, 1.17)   | 1.09(1.04, 1.14)   | 1.01(0.96, 1.06) | 1.00(0.94, 1.07)   | 1.04(0.97, 1.11)   |
| High indoor pollution          | 1.05(1.01, 1.10) | 1.02(0.96, 1.08)   | 1.13(1.06, 1.21)   | 1.01(0.97, 1.06) | 0.99(0.93, 1.05)   | 1.06(0.97, 1.15)   | 1.00(0.94, 1.05) | 1.04(0.96, 1.12)   | 0.97(0.88, 1.07)   |
| Not fully vaccinated           | 1.04(1.02, 1.07) | 1.03(0.99, 1.07)   | 1.05(1.01, 1.08)   | 1.05(1.02, 1.08) | 1.02(0.97, 1.06)   | 1.08(1.04, 1.13)   | 1.01(0.97, 1.04) | 0.99(0.94, 1.05)   | 1.03(0.96, 1.09)   |
| Infectious disease             | 1.04(1.00, 1.08) | 0.98(0.92, 1.05)   | 1.05(1.00, 1.11)   | 1.04(0.99, 1.09) | 1.06(0.99, 1.14)   | 1.07(1.00, 1.14)   | 0.97(0.91, 1.03) | 0.97(0.88, 1.06)   | 0.94(0.86, 1.03)   |
| Child marriage                 | 1.04(1.01, 1.06) | 1.02(0.99, 1.06)   | 1.01(0.98, 1.05)   | 1.01(0.98, 1.04) | 1.02(0.97, 1.06)   | 0.98(0.95, 1.02)   | 0.97(0.94, 1.00) | 0.99(0.94, 1.05)   | 0.99(0.93, 1.04)   |
| Delayed breastfeeding          | 1.04(1.01, 1.06) | 1.02(0.99, 1.06)   | 1.01(0.98, 1.05)   | 0.98(0.96, 1.01) | 0.97(0.93, 1.01)   | 0.97(0.93, 1.01)   | 0.94(0.90, 0.97) | 0.94(0.89, 0.99)   | 0.96(0.91, 1.02)   |
| FP need unsatisfied            | 1.03(1.00, 1.06) | 1.03(0.99, 1.07)   | 1.04(1.01, 1.08)   | 1.01(0.98, 1.04) | 1.03(0.98, 1.07)   | 1.04(1.00, 1.08)   | 0.96(0.92, 0.99) | 0.97(0.92, 1.02)   | 0.96(0.91, 1.02)   |
| No vit A supplement            | 1.00(0.97, 1.02) | 1.04(1.00, 1.09)   | 1.03(0.99, 1.07)   | 1.03(1.00, 1.06) | 1.09(1.03, 1.14)   | 1.00(0.96, 1.05)   | 1.04(1.00, 1.08) | 1.04(0.98, 1.11)   | 1.03(0.97, 1.10)   |
| No iodized salt                | 0.98(0.94, 1.02) | 1.01(0.95, 1.07)   | 0.98(0.94, 1.03)   | 0.95(0.91, 1.00) | 0.98(0.92, 1.05)   | 0.98(0.93, 1.04)   | 0.94(0.89, 0.99) | 0.93(0.85, 1.01)   | 0.90(0.82, 0.97)   |
| Unsafe water                   | 0.97(0.95, 1.00) | 0.97(0.92, 1.02)   | 0.97(0.94, 1.01)   | 0.99(0.96, 1.03) | 0.99(0.92, 1.05)   | 0.97(0.93, 1.02)   | 1.07(1.02, 1.12) | 1.01(0.94, 1.08)   | 1.04(0.98, 1.11)   |
| No care seeking for susp pneu  | 0.96(0.90, 1.01) | 1.06(0.96, 1.16)   | 1.07(0.98, 1.16)   | 0.95(0.89, 1.02) | 1.01(0.90, 1.13)   | 1.11(1.00, 1.23)   | 0.93(0.85, 1.02) | 1.02(0.88, 1.18)   | 1.05(0.90, 1.22)   |

**Note:**

- Abbreviations - HH: household, BMI: body mass index; SBA: skilled birth attendant; ANC: antenatal care; ORT: oral rehydration therapy; FP: family planning; vit: vitamin; susp pneu: suspected pneumonia.

**eFigure 1. Flow Diagram Showing Exclusions and Final Sample Sizes of the Study Population, Using the Most Recent Pooled Demographic Health Survey Data Since 2010**

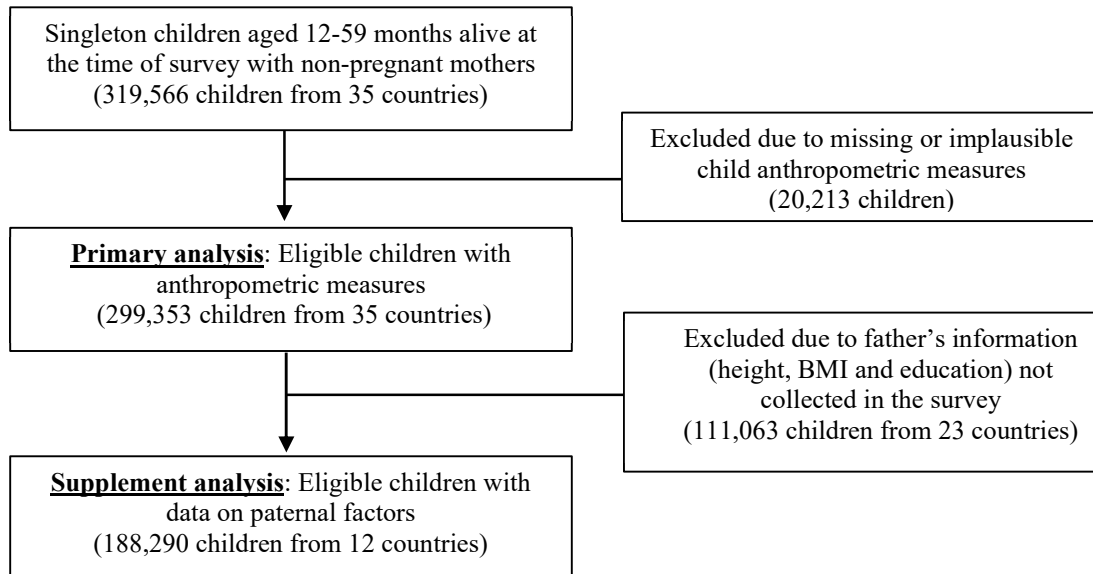



**eFigure 2. Relative Ranking of 20 Factors Associated With Child Anthropometric Failures From Single Adjusted Models for the Pooled Sample (N = 299,353)**  
**A) stunting, B) underweight, and C) wasting, odds ratio (OR) and 95% confidence interval (CI)**

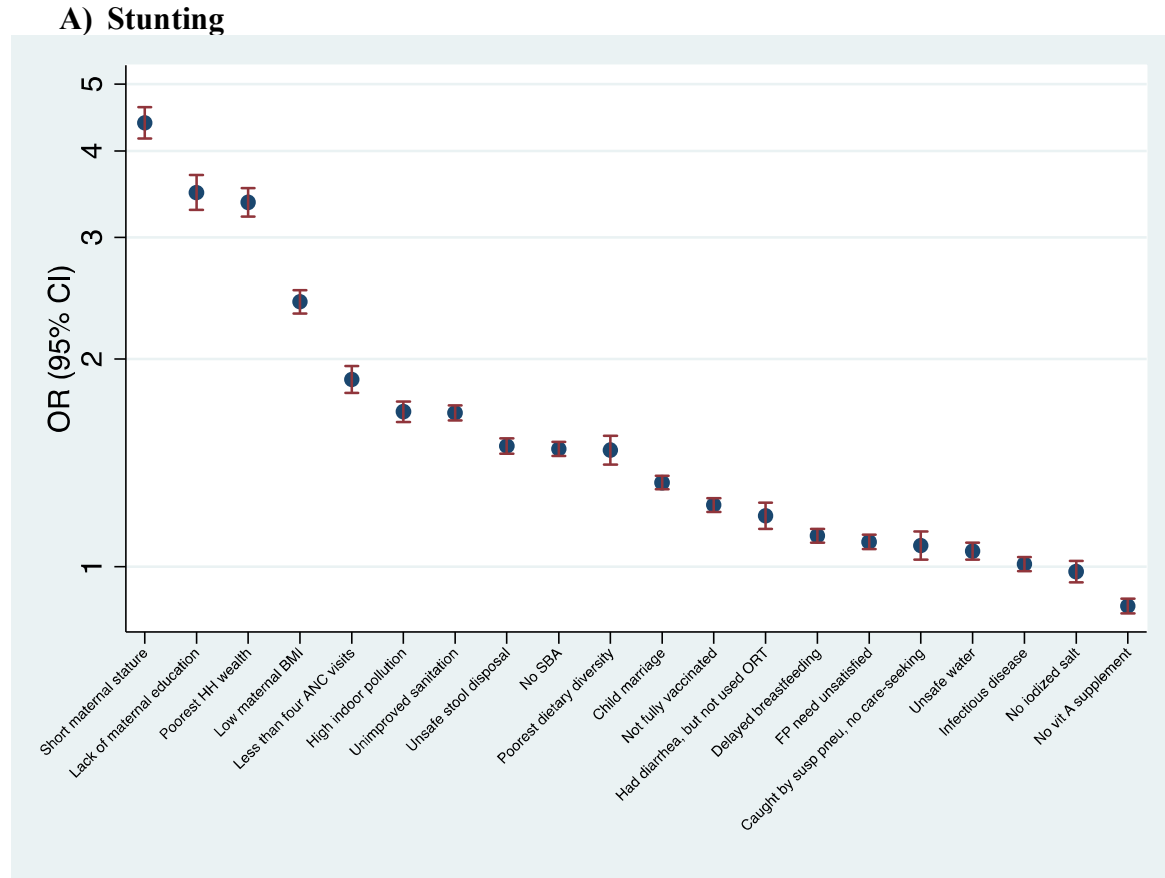

**Note:**

1. We use logarithmic scale for the y axis.
2. Short maternal stature: maternal height <145cm; low maternal BMI: maternal BMI <18.5 kg/m<sup>2</sup>; child marriage: mother's age at marriage <18 years old; delayed breastfeeding: child was not initially breastfed within one hour after born; infectious disease: child was caught by infectious diseases two weeks prior to the survey,
3. Abbreviations - HH: household, BMI: body mass index; SBA: skilled birth attendant; ANC: antenatal care; ORT: oral rehydration therapy; FP: family planning; vit: vitamin; susp pneu: suspected pneumonia.

## B) Underweight

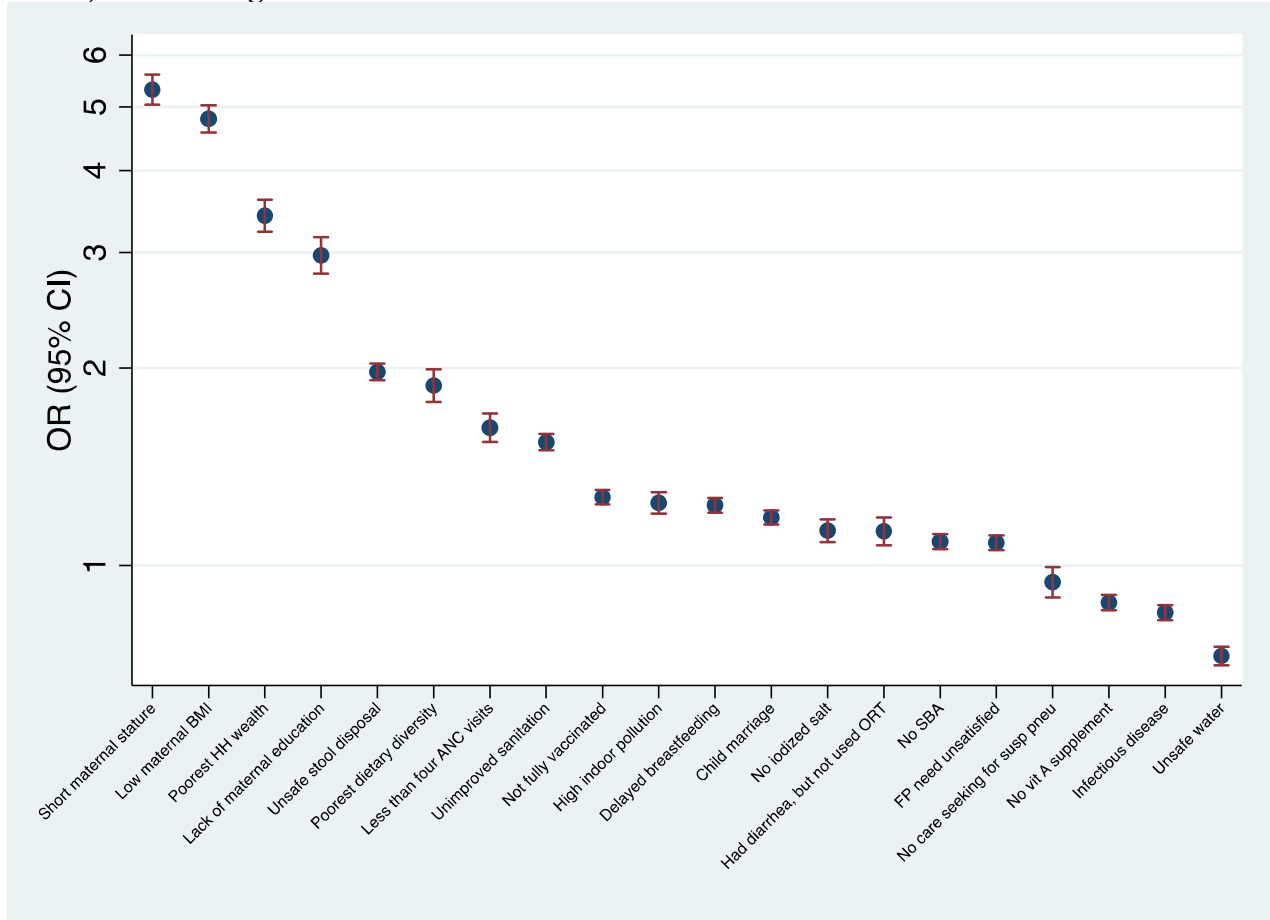

### C) Wasting

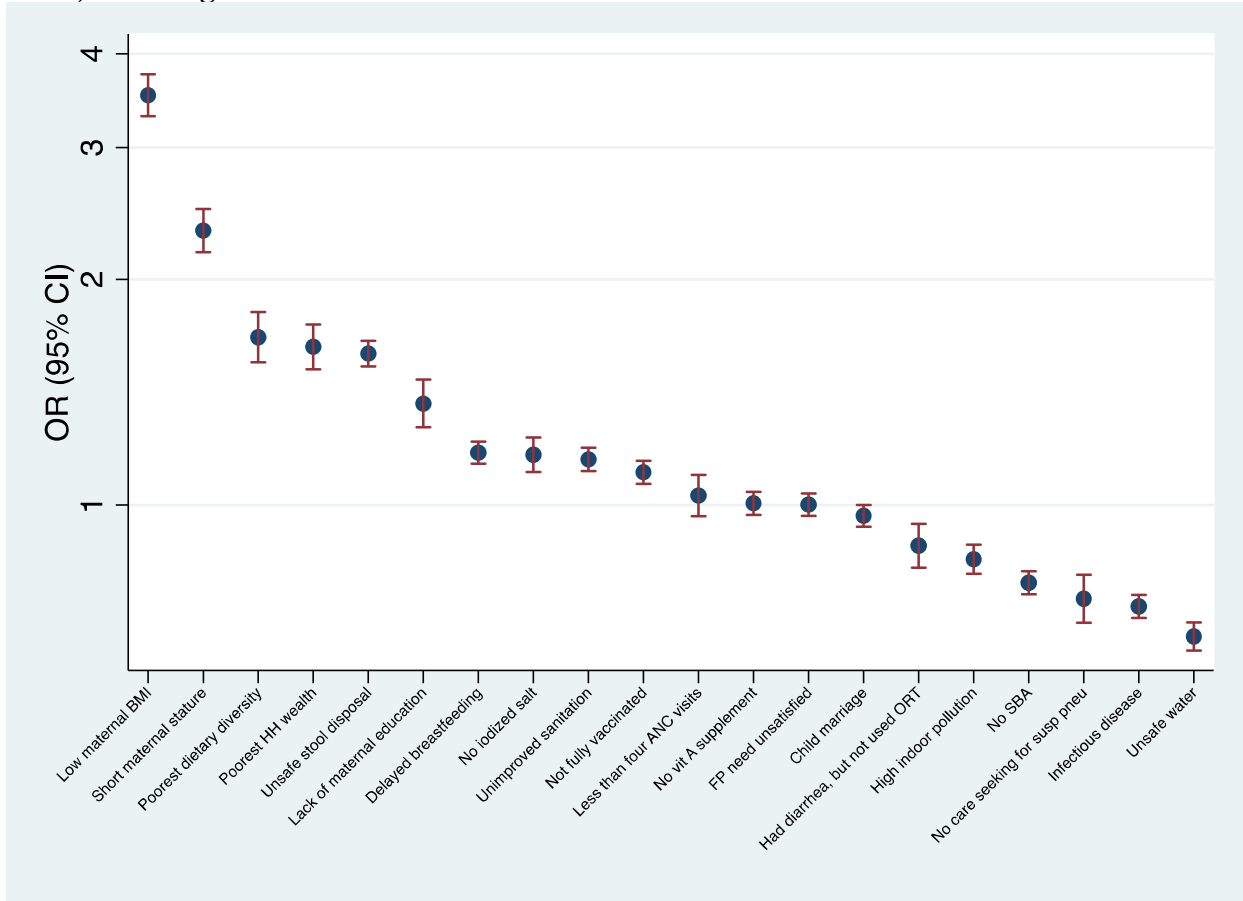

**eFigure 3. Country-Specific Ranking of 20 Factors Associated With Child Anthropometric Failures From Fully Adjusted Models on Underweight**

|                                | BJ | BF | BI | CM | CI | CD | ET | GM | GH | GN | HT | IN | KE | KG | KM | LS | LR | MW | ML | MZ | MM | NA | NP | NE | PE | ST | SL | SZ | TD | TJ | TZ | TG | UG | ZM | ZW |
|--------------------------------|----|----|----|----|----|----|----|----|----|----|----|----|----|----|----|----|----|----|----|----|----|----|----|----|----|----|----|----|----|----|----|----|----|----|----|
| Short maternal stature         | 1  | 1  | 2  | 4  | 3  | 1  | 1  | 1  | 3  | 9  | 3  | 1  | 1  | 11 | 3  | 3  | 1  | 1  | 9  | 4  | 1  | 20 | 2  | 2  | 3  | 3  | 2  | 2  | 11 | 4  | 1  | 2  | 1  | 1  | 6  |
| Lack of maternal education     | 3  | 3  | 19 | 2  | 1  | 6  | 2  | 16 | 1  | 5  | 2  | 3  | 4  | 15 | 2  | 1  | 12 | 16 | 1  | 1  | 18 | 11 | 7  | 5  | 4  | 19 | 20 | 6  | 4  | 15 | 7  | 6  | 2  | 6  | 2  |
| Poorest HH wealth              | 5  | 6  | 3  | 5  | 13 | 3  | 7  | 12 | 13 | 10 | 7  | 4  | 3  | 16 | 5  | 2  | 7  | 3  | 4  | 5  | 15 | 5  | 11 | 9  | 1  | 1  | 13 | 1  | 7  | 13 | 4  | 5  | 4  | 3  | 17 |
| Low maternal BMI               | 2  | 2  | 1  | 1  | 2  | 2  | 3  | 3  | 2  | 1  | 4  | 2  | 2  | 1  | 1  | 5  | 2  | 2  | 2  | 2  | 2  | 6  | 1  | 1  | 2  | 2  | 1  | 3  | 1  | 1  | 2  | 3  | 3  | 2  | 1  |
| Poor dietary diversity         | 11 | 13 | 15 | 3  | 9  | 5  | 5  | 13 | 9  | 6  | 19 | 5  | 19 | 3  | 12 | 20 | 3  | 4  | 3  | 6  | 9  | 14 | 6  | 6  | 20 | 16 | 9  | 18 | 8  | 3  | 11 | 12 | 6  | 20 | 20 |
| No SBA                         | 4  | 5  | 5  | 8  | 17 | 8  | 12 | 5  | 4  | 3  | 15 | 10 | 6  | 13 | 11 | 7  | 9  | 8  | 8  | 20 | 4  | 8  | 13 | 15 | 11 | 9  | 15 | 8  | 6  | 7  | 19 | 9  | 8  | 9  | 11 |
| Less than four ANC visits      | 10 | 20 | 17 | 6  | 20 | 20 | 4  | 2  | 14 | 4  | 9  | 8  | 7  | 18 | 16 | 10 | 14 | 20 | 14 | 3  | 3  | 16 | 8  | 17 | 19 | 13 | 5  | 20 | 5  | 5  | 20 | 1  | 5  | 4  | 10 |
| Unimproved sanitation          | 17 | 9  | 12 | 20 | 7  | 15 | 8  | 9  | 10 | 19 | 6  | 7  | 15 | 2  | 17 | 14 | 6  | 19 | 10 | 15 | 11 | 17 | 3  | 14 | 7  | 15 | 3  | 17 | 12 | 6  | 16 | 19 | 19 | 10 | 8  |
| Had diarrhea, but not used ORT | 9  | 12 | 6  | 7  | 14 | 12 | 6  | 4  | 19 | 7  | 11 | 6  | 8  | 12 | 7  | 4  | 4  | 7  | 6  | 7  | 20 | 3  | 20 | 11 | 8  | 5  | 6  | 4  | 2  | 2  | 12 | 8  | 14 | 16 | 18 |
| Unsafe stool disposal          | 18 | 8  | 10 | 14 | 8  | 9  | 10 | 11 | 6  | 14 | 13 | 9  | 9  | 5  | 8  | 8  | 11 | 5  | 7  | 12 | 6  | 4  | 14 | 3  | 13 | 10 | 19 | 10 | 10 | 8  | 8  | 13 | 7  | 18 | 15 |
| High indoor pollution          | 7  | 4  | 20 | 11 | 4  | 16 | 20 | 10 | 8  | 2  | 1  | 13 | 5  | 6  | 18 | 17 | 20 | 15 | 20 | 8  | 10 | 2  | 4  | 8  | 12 | 20 | 16 | 19 | 9  | 16 | 3  | 4  | 13 | 5  | 5  |
| Not fully vaccinated           | 12 | 11 | 7  | 9  | 11 | 17 | 13 | 17 | 11 | 13 | 10 | 14 | 11 | 19 | 4  | 16 | 13 | 6  | 11 | 13 | 13 | 9  | 15 | 13 | 15 | 6  | 8  | 7  | 3  | 19 | 9  | 7  | 15 | 8  | 14 |
| Infectious disease             | 6  | 7  | 18 | 16 | 6  | 10 | 17 | 20 | 5  | 15 | 20 | 12 | 14 | 4  | 13 | 19 | 10 | 11 | 12 | 9  | 5  | 19 | 5  | 4  | 9  | 17 | 18 | 14 | 14 | 20 | 10 | 14 | 20 | 7  | 9  |
| Child marriage                 | 16 | 16 | 13 | 19 | 16 | 13 | 16 | 15 | 20 | 17 | 17 | 15 | 18 | 14 | 15 | 9  | 16 | 12 | 15 | 17 | 7  | 18 | 18 | 10 | 16 | 7  | 17 | 12 | 17 | 14 | 18 | 10 | 17 | 12 | 7  |
| Delayed breastfeeding          | 15 | 18 | 11 | 17 | 19 | 18 | 15 | 18 | 18 | 20 | 12 | 16 | 17 | 9  | 10 | 6  | 8  | 9  | 13 | 18 | 14 | 7  | 17 | 12 | 10 | 11 | 11 | 19 | 10 | 15 | 17 | 10 | 11 | 13 |    |
| FP need unsatisfied            | 8  | 10 | 16 | 13 | 12 | 19 | 11 | 14 | 16 | 12 | 14 | 17 | 12 | 8  | 6  | 13 | 5  | 14 | 17 | 14 | 16 | 12 | 19 | 16 | 17 | 18 | 10 | 5  | 15 | 12 | 5  | 11 | 16 | 13 | 4  |
| No vit A supplement            | 13 | 17 | 9  | 12 | 10 | 11 | 19 | 6  | 12 | 8  | 16 | 11 | 16 | 7  | 14 | 18 | 15 | 17 | 16 | 16 | 12 | 10 | 9  | 7  | 6  | 4  | 14 | 16 | 18 | 18 | 17 | 15 | 9  | 19 | 19 |
| No iodized salt                | 20 | 14 | 4  | 10 | 5  | 4  | 9  | 19 | 7  | 11 | 8  | 19 | 20 | 17 | 19 | 11 | 19 | 13 | 19 | 19 | 17 | 15 | 12 | 18 | 5  | 12 | 12 | 13 | 16 | 9  | 6  | 18 | 12 | 17 | 3  |
| Unsafe water                   | 19 | 15 | 14 | 15 | 18 | 14 | 18 | 8  | 15 | 18 | 18 | 18 | 10 | 20 | 9  | 12 | 18 | 10 | 18 | 11 | 8  | 13 | 10 | 19 | 18 | 8  | 4  | 9  | 20 | 17 | 14 | 16 | 11 | 15 | 12 |
| No care seeking for susp pneu  | 14 | 19 | 8  | 18 | 15 | 7  | 14 | 7  | 17 | 16 | 5  | 20 | 13 | 10 | 20 | 15 | 17 | 18 | 5  | 10 | 19 | 1  | 16 | 20 | 14 | 14 | 7  | 15 | 13 | 11 | 13 | 20 | 18 | 14 | 16 |

**Label:**  
■ Rank 1<sup>st</sup>      ■ Rank 2<sup>nd</sup>      ■ Rank 3<sup>rd</sup>-4<sup>th</sup>      ■ Rank 5<sup>th</sup>-7<sup>th</sup>      ■ Rank 8<sup>th</sup>-12<sup>nd</sup>      ■ Rank 13<sup>th</sup>-20<sup>th</sup>

- Note:**
1. BJ= Benin, BF= Burkina Faso, BI= Burundi, CM=Cameroon, CI=Côte d'Ivoire, CD=The Democratic Republic of the Congo, ET=Ethiopia, GM=Gambia, GH=Ghana, GN=Guinea, HT=Haiti, IN=India, KE=Kenya, KG=Kyrgyzstan, KM=Comoros, LS=Lesotho, LR=Liberia, MW=Malawi, ML=Mali, MZ=Mozambique, MM=Myanmar, NA=Namibia, NP=Nepal, NE=Niger, PE=Peru, ST= São Tomé and Príncipe, SL=Sierra Leone, SZ=Swaziland, TD=Chad, TJ=Tajikistan, TZ=Tanzania, TG=Togo, UG=Uganda, ZM=Zambia, ZW=Zimbabwe.
  2. Short maternal stature: maternal height <145cm; low maternal BMI: maternal BMI <18.5 kg/m<sup>2</sup>; child marriage: mother's age at marriage <18 years old; delayed breastfeeding: child was not initially breastfed within one hour after born; infectious disease: child was caught by infectious diseases two weeks prior to the survey.
  3. Abbreviations - HH: household, BMI: body mass index; SBA: skilled birth attendant; ANC: antenatal care; ORT: oral rehydration therapy; FP: family planning; vit: vitamin; susp pneu: suspected pneumonia.

**eFigure 4. Country-Specific Odds Ratios for 20 Factors Associated With Child Anthropometric Failures From Fully Adjusted Models on Underweight**

|                                | BJ  | BF  | BI  | CM  | CI   | CD  | ET  | GM  | GH   | GN  | HT  | IN  | KE  | KG  | KM  | LS   | LR  | MW  | ML  | MZ  | MM  | NA  | NP  | NE  | PE   | ST  | SL  | SZ  | TD  | TJ  | TZ  | TG  | UG  | ZM  | ZW  |     |
|--------------------------------|-----|-----|-----|-----|------|-----|-----|-----|------|-----|-----|-----|-----|-----|-----|------|-----|-----|-----|-----|-----|-----|-----|-----|------|-----|-----|-----|-----|-----|-----|-----|-----|-----|-----|-----|
| Short maternal stature         | 4.2 | 6.1 | 3.8 | 2.6 | 2.4  | 3.4 | 4.0 | 6.2 | 2.3  | 1.6 | 6.9 | 3.4 | 4.9 | 1.0 | 1.8 | 5.2  | 6.7 | 6.8 | 1.2 | 4.0 | 4.2 | 0.2 | 2.6 | 1.6 | 6.2  | 3.2 | 2.1 | 5.0 | 1.1 | 1.7 | 5.8 | 5.6 | 7.0 | 4.3 | 1.3 |     |
| Lack of maternal education     | 2.3 | 1.7 | 0.7 | 5.2 | 18.7 | 1.4 | 2.8 | 0.9 | 11.4 | 1.7 | 7.5 | 1.8 | 2.0 | 1.0 | 3.0 | 33.3 | 1.1 | 0.9 | 3.7 | 5.0 | 0.7 | 1.2 | 1.2 | 1.5 | 2.7  | 0.7 | 0.7 | 1.9 | 1.4 | 0.9 | 1.2 | 1.7 | 5.6 | 1.4 | 2.1 |     |
| Poorest HH wealth              | 1.3 | 1.3 | 2.8 | 2.5 | 1.1  | 2.6 | 1.8 | 1.1 | 1.0  | 1.4 | 1.5 | 1.6 | 2.6 | 0.9 | 1.5 | 5.7  | 1.3 | 2.1 | 1.6 | 2.2 | 0.9 | 3.1 | 1.2 | 1.2 | 13.9 | 6.0 | 1.1 | 5.4 | 1.3 | 1.0 | 2.0 | 1.8 | 2.7 | 1.9 | 0.8 |     |
| Low maternal BMI               | 3.5 | 3.7 | 6.8 | 5.9 | 7.3  | 2.6 | 2.7 | 2.0 | 4.1  | 2.7 | 4.3 | 2.6 | 3.2 | 5.5 | 3.2 | 2.8  | 5.6 | 3.6 | 2.6 | 4.8 | 3.5 | 2.0 | 3.6 | 3.2 | 7.0  | 5.7 | 2.1 | 3.7 | 2.8 | 3.2 | 3.2 | 5.0 | 3.3 | 2.7 | 6.4 |     |
| Poor dietary diversity         | 1.1 | 1.0 | 1.0 | 3.1 | 1.1  | 1.4 | 1.9 | 1.1 | 1.2  | 1.7 | 0.8 | 1.4 | 0.8 | 1.9 | 1.1 | 0.4  | 1.6 | 1.5 | 1.6 | 1.7 | 1.2 | 0.8 | 1.3 | 1.4 | 0.5  | 0.8 | 1.3 | 0.6 | 1.2 | 1.8 | 1.1 | 1.2 | 1.4 | 0.9 | 0.5 |     |
| No SBA                         | 1.6 | 1.4 | 1.6 | 1.4 | 0.7  | 1.2 | 1.0 | 1.3 | 1.5  | 1.8 | 1.1 | 1.1 | 1.3 | 1.0 | 1.2 | 1.2  | 1.2 | 1.3 | 1.3 | 0.8 | 1.5 | 1.4 | 1.0 | 1.0 | 1.1  | 1.3 | 1.0 | 1.2 | 1.3 | 1.2 | 0.9 | 1.2 | 1.2 | 1.2 | 1.2 |     |
| Less than four ANC visits      | 1.1 | 0.1 | 0.8 | 1.9 | 0.5  | 0.5 | 2.2 | 2.3 | 0.9  | 1.7 | 1.4 | 1.1 | 1.3 | 0.8 | 0.9 | 0.9  | 0.9 | 0.6 | 1.0 | 4.0 | 1.6 | 0.7 | 1.2 | 1.0 | 0.8  | 1.1 | 1.4 | 0.2 | 1.4 | 1.5 | 0.8 | 7.3 | 1.6 | 1.9 | 1.2 |     |
| Unimproved sanitation          | 1.0 | 1.2 | 1.1 | 1.0 | 1.2  | 1.1 | 1.3 | 1.2 | 1.1  | 0.9 | 1.5 | 1.1 | 1.0 | 2.5 | 0.8 | 0.7  | 1.4 | 0.7 | 1.1 | 1.0 | 1.0 | 0.6 | 1.8 | 1.0 | 1.3  | 0.9 | 1.5 | 0.7 | 1.1 | 1.2 | 0.9 | 0.9 | 0.7 | 1.2 | 1.3 |     |
| Had diarrhea, but not used ORT | 1.2 | 1.1 | 1.5 | 1.5 | 1.0  | 1.1 | 1.8 | 1.5 | 0.6  | 1.6 | 1.2 | 1.2 | 1.2 | 1.0 | 1.4 | 3.0  | 1.5 | 1.3 | 1.3 | 1.6 | 0.4 | 3.5 | 0.8 | 1.1 | 1.2  | 2.5 | 1.4 | 3.0 | 1.4 | 2.0 | 1.1 | 1.3 | 1.0 | 0.9 | 0.7 |     |
| Unsafe stool disposal          | 0.9 | 1.2 | 1.2 | 1.2 | 1.2  | 1.2 | 1.1 | 1.1 | 1.3  | 1.1 | 1.2 | 1.1 | 1.1 | 1.5 | 1.2 | 1.1  | 1.1 | 1.3 | 1.3 | 1.1 | 1.4 | 3.4 | 1.0 | 1.6 | 1.0  | 1.2 | 0.9 | 1.1 | 1.2 | 1.2 | 1.2 | 1.2 | 1.4 | 0.9 | 0.9 |     |
| High indoor pollution          | 1.2 | 1.5 | 0.3 | 1.2 | 1.9  | 1.0 | 0.7 | 1.1 | 1.3  | 2.0 | 7.8 | 1.0 | 1.8 | 1.4 | 0.8 | 0.6  | 0.2 | 1.0 | 0.8 | 1.3 | 1.1 | 4.0 | 1.5 | 1.2 | 1.0  | 0.4 | 1.0 | 0.4 | 1.2 | 0.9 | 2.1 | 3.7 | 1.0 | 1.5 | 1.4 |     |
| Not fully vaccinated           | 1.1 | 1.1 | 1.4 | 1.3 | 1.1  | 1.0 | 1.0 | 0.9 | 1.1  | 1.1 | 1.2 | 1.0 | 1.0 | 0.8 | 1.6 | 0.6  | 1.0 | 1.3 | 1.1 | 1.0 | 1.0 | 1.3 | 0.9 | 1.0 | 1.0  | 1.7 | 1.3 | 1.4 | 1.4 | 0.8 | 1.2 | 1.4 | 0.9 | 1.2 | 0.9 |     |
| Infectious disease             | 1.3 | 1.2 | 0.8 | 1.1 | 1.6  | 1.2 | 0.9 | 0.6 | 1.5  | 1.0 | 0.7 | 1.0 | 1.0 | 1.9 | 1.0 | 0.5  | 1.2 | 1.1 | 1.1 | 1.3 | 1.5 | 0.2 | 1.5 | 1.5 | 1.1  | 0.7 | 0.9 | 0.8 | 1.0 | 0.7 | 1.2 | 1.0 | 0.7 | 1.3 | 1.2 |     |
| Child marriage                 | 1.0 | 1.0 | 1.1 | 1.0 | 0.9  | 1.1 | 1.0 | 1.0 | 0.6  | 1.0 | 0.8 | 1.0 | 0.8 | 1.0 | 0.9 | 1.0  | 0.9 | 1.1 | 1.0 | 0.9 | 1.2 | 0.5 | 0.9 | 1.1 | 1.0  | 1.6 | 1.0 | 0.9 | 0.9 | 0.9 | 0.9 | 0.9 | 1.2 | 0.9 | 1.1 | 1.3 |
| Delayed breastfeeding          | 1.0 | 0.9 | 1.1 | 1.0 | 0.6  | 0.9 | 1.0 | 0.8 | 0.7  | 0.9 | 1.2 | 1.0 | 0.9 | 1.0 | 1.2 | 1.3  | 1.3 | 1.2 | 1.0 | 0.9 | 0.9 | 1.6 | 0.9 | 1.0 | 1.1  | 1.2 | 1.2 | 1.0 | 0.8 | 1.0 | 1.0 | 0.9 | 1.1 | 1.1 | 1.0 |     |
| FP need unsatisfied            | 1.2 | 1.2 | 1.0 | 1.2 | 1.1  | 0.8 | 1.0 | 1.0 | 0.8  | 1.1 | 1.1 | 1.0 | 1.0 | 1.1 | 1.5 | 0.7  | 1.4 | 1.0 | 1.0 | 1.0 | 0.8 | 1.0 | 0.9 | 1.0 | 0.9  | 0.7 | 1.2 | 2.0 | 1.0 | 1.0 | 1.3 | 1.2 | 0.9 | 1.0 | 1.4 |     |
| No vit A supplement            | 1.1 | 0.9 | 1.2 | 1.2 | 1.1  | 1.1 | 0.8 | 1.2 | 1.0  | 1.6 | 1.1 | 1.0 | 0.9 | 1.3 | 1.0 | 0.6  | 0.9 | 0.8 | 1.0 | 1.0 | 1.0 | 1.2 | 1.2 | 1.3 | 1.5  | 2.6 | 1.0 | 0.7 | 0.8 | 0.8 | 0.9 | 1.0 | 1.1 | 0.9 | 0.7 |     |
| No iodized salt                | 0.9 | 1.0 | 2.0 | 1.2 | 1.6  | 1.8 | 1.2 | 0.7 | 1.3  | 1.3 | 1.4 | 0.9 | 0.7 | 0.8 | 0.7 | 0.8  | 0.3 | 1.1 | 1.0 | 0.9 | 0.8 | 0.7 | 1.1 | 0.9 | 1.5  | 1.2 | 1.2 | 0.9 | 0.9 | 1.1 | 1.3 | 0.9 | 1.0 | 0.9 | 1.6 |     |
| Unsafe water                   | 0.9 | 1.0 | 1.1 | 1.1 | 0.7  | 1.1 | 0.9 | 1.2 | 0.9  | 1.0 | 0.8 | 1.0 | 1.1 | 0.6 | 1.2 | 0.8  | 0.7 | 1.2 | 1.0 | 1.1 | 1.2 | 1.0 | 1.2 | 0.9 | 0.9  | 1.3 | 1.5 | 1.1 | 0.8 | 0.8 | 1.0 | 1.0 | 1.1 | 1.0 | 1.0 |     |
| No care seeking for susp pneu  | 1.0 | 0.9 | 1.3 | 1.0 | 1.0  | 1.2 | 1.0 | 1.2 | 0.7  | 1.0 | 1.6 | 0.9 | 1.0 | 1.0 | 0.7 | 0.7  | 0.8 | 0.8 | 1.4 | 1.2 | 0.7 | 5.1 | 0.9 | 0.6 | 1.0  | 1.0 | 1.3 | 0.8 | 1.0 | 1.0 | 1.0 | 0.7 | 0.8 | 1.0 | 0.9 |     |

Label: odds ratios

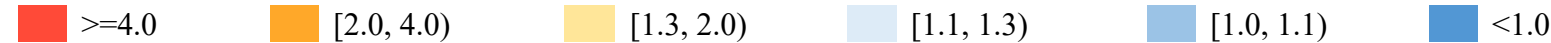

- Note:**
1. BJ= Benin, BF= Burkina Faso, BI= Burundi, CM=Cameroon, CI=Côte d'Ivoire, CD=The Democratic Republic of the Congo, ET=Ethiopia, GM=Gambia, GH=Ghana, GN=Guinea, HT=Haiti, IN=India, KE=Kenya, KG=Kyrgyzstan, KM=Comoros, LS=Lesotho, LR=Liberia, MW=Malawi, ML=Mali, MZ=Mozambique, MM=Myanmar, NA=Namibia, NP=Nepal, NE=Niger, PE=Peru, ST= São Tomé and Príncipe, SL=Sierra Leone, SZ=Swaziland, TD=Chad, TJ=Tajikistan, TZ=Tanzania, TG=Togo, UG=Uganda, ZM=Zambia, ZW=Zimbabwe.
  2. Short maternal stature: maternal height <145cm; low maternal BMI: maternal BMI <18.5 kg/m<sup>2</sup>; child marriage: mother's age at marriage <18 years old; delayed breastfeeding: child was not initially breastfed within one hour after born; infectious disease: child was caught by infectious diseases two weeks prior to the survey.
  3. Abbreviations - HH: household, BMI: body mass index; SBA: skilled birth attendant; ANC: antenatal care; ORT: oral rehydration therapy; FP: family planning; vit: vitamin; susp pneu: suspected pneumonia.

**eFigure 5. Country-Specific Ranking of 20 Factors Associated With Child Anthropometric Failures From Fully Adjusted Models on Wasting**

|                                | BJ | BF | BI | CM | CI | CD | ET | GM | GH | GN | HT | IN | KE | KG | KM | LS | LR | MW | ML | MZ | MM | NA | NP | NE | PE | ST | SL | SZ | TD | TJ | TZ | TG | UG | ZM | ZW |
|--------------------------------|----|----|----|----|----|----|----|----|----|----|----|----|----|----|----|----|----|----|----|----|----|----|----|----|----|----|----|----|----|----|----|----|----|----|----|
| Short maternal stature         | 3  | 5  | 19 | 9  | 9  | 2  | 6  | 9  | 11 | 13 | 18 | 5  | 11 | 10 | 2  | 8  | 1  | 1  | 20 | 1  | 17 | 11 | 20 | 1  | 3  | 20 | 20 | 10 | 1  | 9  | 3  | 3  | 3  | 5  | 2  |
| Lack of maternal education     | 17 | 4  | 20 | 5  | 1  | 1  | 7  | 6  | 1  | 5  | 1  | 3  | 1  | 8  | 3  | 10 | 14 | 20 | 2  | 4  | 19 | 2  | 6  | 19 | 14 | 7  | 5  | 19 | 6  | 19 | 8  | 4  | 19 | 20 | 12 |
| Poorest HH wealth              | 20 | 10 | 3  | 1  | 13 | 4  | 3  | 20 | 14 | 19 | 6  | 4  | 2  | 7  | 4  | 13 | 8  | 18 | 7  | 2  | 3  | 1  | 19 | 4  | 16 | 16 | 19 | 2  | 16 | 20 | 18 | 2  | 2  | 2  | 6  |
| Low maternal BMI               | 1  | 2  | 1  | 4  | 2  | 5  | 1  | 2  | 2  | 3  | 2  | 1  | 5  | 2  | 10 | 4  | 3  | 3  | 1  | 3  | 1  | 7  | 2  | 2  | 1  | 11 | 1  | 1  | 2  | 1  | 1  | 1  | 1  | 6  | 1  |
| Poor dietary diversity         | 14 | 1  | 17 | 2  | 14 | 8  | 5  | 4  | 20 | 2  | 19 | 2  | 19 | 15 | 1  | 2  | 4  | 5  | 17 | 6  | 2  | 20 | 1  | 11 | 19 | 19 | 2  | 6  | 11 | 8  | 5  | 18 | 13 | 13 | 3  |
| No SBA                         | 10 | 11 | 5  | 3  | 18 | 3  | 9  | 10 | 6  | 4  | 12 | 15 | 7  | 11 | 18 | 7  | 10 | 7  | 12 | 19 | 6  | 10 | 14 | 18 | 10 | 14 | 13 | 18 | 13 | 13 | 10 | 7  | 7  | 3  | 16 |
| Less than four ANC visits      | 19 | 18 | 15 | 20 | 20 | 20 | 2  | 1  | 3  | 1  | 4  | 18 | 3  | 19 | 19 | 16 | 13 | 13 | 10 | 20 | 5  | 6  | 13 | 20 | 17 | 1  | 10 | 20 | 4  | 3  | 19 | 20 | 18 | 1  | 9  |
| Unimproved sanitation          | 13 | 16 | 10 | 10 | 10 | 19 | 19 | 14 | 8  | 10 | 9  | 7  | 18 | 6  | 8  | 1  | 9  | 14 | 4  | 14 | 14 | 14 | 4  | 10 | 7  | 4  | 4  | 5  | 3  | 11 | 16 | 12 | 8  | 7  | 7  |
| Had diarrhea, but not used ORT | 5  | 6  | 4  | 6  | 16 | 10 | 8  | 12 | 5  | 6  | 13 | 9  | 4  | 12 | 5  | 9  | 5  | 10 | 11 | 12 | 18 | 8  | 9  | 6  | 9  | 10 | 3  | 11 | 8  | 2  | 20 | 13 | 17 | 8  | 17 |
| Unsafe stool disposal          | 18 | 3  | 14 | 16 | 7  | 18 | 10 | 8  | 16 | 18 | 8  | 11 | 6  | 16 | 6  | 17 | 12 | 17 | 9  | 9  | 4  | 5  | 10 | 5  | 15 | 8  | 7  | 8  | 7  | 6  | 7  | 17 | 10 | 18 | 15 |
| High indoor pollution          | 2  | 20 | 18 | 19 | 3  | 9  | 4  | 16 | 19 | 7  | 16 | 10 | 13 | 14 | 16 | 15 | 11 | 12 | 3  | 15 | 13 | 15 | 5  | 3  | 2  | 17 | 14 | 14 | 5  | 14 | 2  | 19 | 20 | 19 | 5  |
| Not fully vaccinated           | 6  | 17 | 8  | 8  | 17 | 12 | 16 | 17 | 17 | 16 | 10 | 13 | 9  | 4  | 9  | 6  | 15 | 8  | 13 | 7  | 12 | 12 | 16 | 8  | 5  | 9  | 15 | 13 | 9  | 12 | 6  | 8  | 16 | 14 | 18 |
| Infectious disease             | 9  | 12 | 11 | 13 | 4  | 6  | 18 | 19 | 18 | 12 | 17 | 14 | 17 | 20 | 17 | 20 | 18 | 4  | 5  | 8  | 10 | 19 | 7  | 16 | 6  | 18 | 12 | 7  | 15 | 18 | 4  | 11 | 11 | 16 | 8  |
| Child marriage                 | 12 | 13 | 7  | 17 | 5  | 14 | 11 | 13 | 9  | 15 | 20 | 17 | 16 | 5  | 14 | 14 | 19 | 9  | 15 | 17 | 11 | 9  | 17 | 14 | 12 | 6  | 8  | 17 | 12 | 7  | 17 | 5  | 12 | 9  | 10 |
| Delayed breastfeeding          | 15 | 14 | 12 | 7  | 19 | 11 | 15 | 11 | 15 | 20 | 7  | 19 | 14 | 18 | 15 | 11 | 7  | 15 | 8  | 11 | 7  | 4  | 12 | 15 | 11 | 5  | 16 | 4  | 10 | 5  | 9  | 9  | 9  | 17 | 14 |
| FP need unsatisfied            | 16 | 9  | 16 | 11 | 12 | 16 | 17 | 15 | 13 | 17 | 11 | 16 | 15 | 9  | 7  | 18 | 16 | 11 | 16 | 18 | 16 | 17 | 15 | 9  | 8  | 13 | 9  | 3  | 18 | 15 | 12 | 15 | 15 | 10 | 20 |
| No vit A supplement            | 8  | 7  | 13 | 15 | 15 | 7  | 20 | 5  | 7  | 8  | 5  | 8  | 8  | 3  | 12 | 3  | 6  | 16 | 18 | 5  | 20 | 18 | 18 | 7  | 20 | 3  | 17 | 9  | 17 | 17 | 14 | 6  | 14 | 11 | 19 |
| No iodized salt                | 7  | 19 | 2  | 14 | 11 | 17 | 12 | 18 | 12 | 9  | 3  | 12 | 20 | 13 | 20 | 19 | 20 | 2  | 14 | 10 | 15 | 16 | 3  | 17 | 18 | 2  | 18 | 12 | 20 | 4  | 13 | 14 | 4  | 4  | 4  |
| Unsafe water                   | 11 | 15 | 6  | 18 | 6  | 15 | 13 | 7  | 10 | 14 | 14 | 6  | 10 | 17 | 13 | 12 | 17 | 6  | 19 | 16 | 8  | 13 | 11 | 13 | 4  | 15 | 11 | 15 | 19 | 16 | 11 | 10 | 5  | 12 | 11 |
| No care seeking for susp pneu  | 4  | 8  | 9  | 12 | 8  | 13 | 14 | 3  | 4  | 11 | 15 | 20 | 12 | 1  | 11 | 5  | 2  | 19 | 6  | 13 | 9  | 3  | 8  | 12 | 13 | 12 | 6  | 16 | 14 | 10 | 15 | 16 | 6  | 15 | 13 |

**Label:**  
■ Rank 1<sup>st</sup>     ■ Rank 2<sup>nd</sup>     ■ Rank 3<sup>rd</sup>-4<sup>th</sup>     ■ Rank 5<sup>th</sup>-7<sup>th</sup>     ■ Rank 8<sup>th</sup>-12<sup>nd</sup>     ■ Rank 13<sup>th</sup>-20<sup>th</sup>

- Note:**
1. BJ= Benin, BF= Burkina Faso, BI= Burundi, CM=Cameroon, CI=Côte d'Ivoire, CD=The Democratic Republic of the Congo, ET=Ethiopia, GM=Gambia, GH=Ghana, GN=Guinea, HT=Haiti, IN=India, KE=Kenya, KG=Kyrgyzstan, KM=Comoros, LS=Lesotho, LR=Liberia, MW=Malawi, ML=Mali, MZ=Mozambique, MM=Myanmar, NA=Namibia, NP=Nepal, NE=Niger, PE=Peru, ST= São Tomé and Príncipe, SL=Sierra Leone, SZ=Swaziland, TD=Chad, TJ=Tajikistan, TZ=Tanzania, TG=Togo, UG=Uganda, ZM=Zambia, ZW=Zimbabwe.
  2. Short maternal stature: maternal height <145cm; low maternal BMI: maternal BMI <18.5 kg/m<sup>2</sup>; child marriage: mother's age at marriage <18 years old; delayed breastfeeding: child was not initially breastfed within one hour after born; infectious disease: child was caught by infectious diseases two weeks prior to the survey.
  3. Abbreviations - HH: household, BMI: body mass index; SBA: skilled birth attendant; ANC: antenatal care; ORT: oral rehydration therapy; FP: family planning; vit: vitamin; susp pneu: suspected pneumonia.

**eFigure 6. Country-Specific Odds Ratios for 20 Factors Associated With Child Anthropometric Failures From Fully Adjusted Models on Wasting**

|                                | BJ  | BF  | BI   | CM  | CI  | CD  | ET  | GM   | GH   | GN  | HT  | IN  | KE  | KG   | KM  | LS   | LR  | MW  | ML  | MZ  | MM  | NA   | NP  | NE  | PE   | ST  | SL  | SZ   | TD  | TJ  | TZ  | TG  | UG  | ZM  | ZW  |
|--------------------------------|-----|-----|------|-----|-----|-----|-----|------|------|-----|-----|-----|-----|------|-----|------|-----|-----|-----|-----|-----|------|-----|-----|------|-----|-----|------|-----|-----|-----|-----|-----|-----|-----|
| Short maternal stature         | 2.0 | 1.5 | 0.5  | 1.4 | 1.0 | 1.8 | 1.7 | 1.0  | 1.0  | 0.9 | 0.7 | 1.2 | 1.0 | 1.0  | 1.6 | 1.1  | 5.1 | 8.7 | 0.6 | 2.7 | 0.6 | 1.0  | 0.4 | 3.1 | 2.1  | 0.4 | 0.2 | 1.0  | 5.3 | 1.0 | 1.9 | 2.2 | 2.4 | 1.5 | 3.3 |
| Lack of maternal education     | 0.8 | 1.8 | 0.1  | 1.7 | 3.3 | 4.1 | 1.6 | 1.3  | 44.0 | 1.7 | 7.4 | 1.2 | 4.0 | 1.1  | 1.6 | 1.0  | 1.0 | 0.2 | 2.5 | 1.9 | 0.6 | 5.1  | 1.8 | 0.7 | 1.0  | 1.3 | 1.6 | 0.1  | 1.4 | 0.6 | 1.2 | 1.9 | 0.5 | 0.6 | 1.0 |
| Poorest HH wealth              | 0.5 | 1.1 | 1.9  | 5.1 | 0.8 | 1.7 | 1.9 | 0.6  | 0.7  | 0.6 | 1.4 | 1.2 | 3.1 | 1.2  | 1.5 | 0.8  | 1.1 | 0.7 | 1.2 | 2.6 | 1.4 | 16.5 | 0.5 | 1.7 | 0.8  | 0.8 | 0.7 | 16.6 | 0.9 | 0.6 | 0.7 | 4.1 | 4.3 | 1.7 | 1.4 |
| Low maternal BMI               | 5.7 | 2.8 | 16.4 | 2.2 | 2.9 | 1.4 | 3.7 | 3.2  | 3.1  | 2.0 | 2.8 | 2.3 | 1.5 | 2.7  | 1.3 | 2.0  | 2.7 | 3.0 | 2.6 | 2.0 | 2.1 | 1.6  | 2.2 | 2.8 | 11.6 | 1.1 | 2.2 | 40.0 | 4.6 | 3.4 | 2.5 | 4.5 | 5.8 | 1.2 | 3.8 |
| Poor dietary diversity         | 1.0 | 4.5 | 0.6  | 2.4 | 0.8 | 1.1 | 1.7 | 1.7  | 0.2  | 4.6 | 0.6 | 1.2 | 0.7 | 0.8  | 2.2 | 5.9  | 2.0 | 1.9 | 0.8 | 1.7 | 1.4 | 0.2  | 2.4 | 1.0 | 0.6  | 0.7 | 1.9 | 1.7  | 1.1 | 1.0 | 1.7 | 0.6 | 0.8 | 1.1 | 2.6 |
| No SBA                         | 1.2 | 1.0 | 1.6  | 2.3 | 0.6 | 1.8 | 1.3 | 1.0  | 1.7  | 1.7 | 1.0 | 1.0 | 1.2 | 1.0  | 0.7 | 1.6  | 1.0 | 1.3 | 1.1 | 0.6 | 1.3 | 1.2  | 1.0 | 0.8 | 1.2  | 1.0 | 1.1 | 0.2  | 1.0 | 0.9 | 1.1 | 1.2 | 1.0 | 1.6 | 0.6 |
| Less than four ANC visits      | 0.6 | 0.6 | 1.0  | 0.5 | 0.3 | 0.7 | 2.6 | 14.0 | 2.9  | 6.9 | 1.4 | 0.9 | 2.2 | 0.3  | 0.7 | 0.3  | 1.0 | 0.8 | 1.1 | 0.5 | 1.3 | 2.6  | 1.0 | 0.6 | 0.8  | 4.7 | 1.2 | 0.1  | 1.5 | 2.2 | 0.5 | 0.3 | 0.5 | 2.5 | 1.1 |
| Unimproved sanitation          | 1.1 | 0.8 | 1.1  | 1.3 | 1.0 | 0.8 | 0.7 | 0.9  | 1.6  | 1.1 | 1.3 | 1.1 | 0.8 | 1.3  | 1.4 | 16.8 | 1.1 | 0.8 | 1.3 | 0.9 | 0.9 | 0.6  | 2.0 | 1.0 | 1.3  | 1.6 | 1.6 | 1.7  | 1.6 | 1.0 | 0.8 | 1.0 | 0.9 | 1.2 | 1.2 |
| Had diarrhea, but not used ORT | 1.6 | 1.4 | 1.7  | 1.5 | 0.7 | 1.0 | 1.6 | 1.0  | 2.4  | 1.5 | 0.8 | 1.0 | 1.8 | 1.0  | 1.5 | 1.0  | 1.8 | 1.1 | 1.1 | 0.9 | 0.6 | 1.5  | 1.3 | 1.4 | 1.2  | 1.2 | 1.9 | 1.0  | 1.3 | 2.7 | 0.5 | 0.9 | 0.5 | 1.2 | 0.6 |
| Unsafe stool disposal          | 0.7 | 1.9 | 1.0  | 0.8 | 1.0 | 0.8 | 1.2 | 1.3  | 0.7  | 0.7 | 1.3 | 1.0 | 1.4 | 0.7  | 1.4 | 0.2  | 1.0 | 0.7 | 1.1 | 1.3 | 1.3 | 3.7  | 1.3 | 1.4 | 0.9  | 1.3 | 1.3 | 1.4  | 1.3 | 1.3 | 1.3 | 0.7 | 0.9 | 0.8 | 0.7 |
| High indoor pollution          | 2.4 | 0.6 | 0.5  | 0.6 | 2.3 | 1.0 | 1.9 | 0.9  | 0.3  | 1.3 | 0.7 | 1.0 | 1.0 | 0.8  | 0.8 | 0.5  | 1.0 | 0.9 | 1.9 | 0.8 | 0.9 | 0.5  | 1.8 | 1.8 | 2.5  | 0.8 | 1.0 | 0.7  | 1.4 | 0.9 | 2.0 | 0.6 | 0.4 | 0.8 | 1.9 |
| Not fully vaccinated           | 1.3 | 0.8 | 1.2  | 1.4 | 0.7 | 0.9 | 0.9 | 0.8  | 0.5  | 0.8 | 1.3 | 1.0 | 1.1 | 1.6  | 1.3 | 1.9  | 0.9 | 1.3 | 1.0 | 1.4 | 0.9 | 0.8  | 0.9 | 1.1 | 1.7  | 1.2 | 1.0 | 0.8  | 1.2 | 1.0 | 1.6 | 1.2 | 0.6 | 1.0 | 0.6 |
| Infectious disease             | 1.2 | 1.0 | 1.1  | 1.0 | 2.0 | 1.4 | 0.8 | 0.7  | 0.3  | 0.9 | 0.7 | 1.0 | 0.8 | 0.6  | 0.7 | 0.1  | 0.6 | 2.0 | 1.3 | 1.3 | 1.0 | 0.3  | 1.7 | 0.8 | 1.6  | 0.8 | 1.1 | 1.6  | 0.9 | 0.7 | 1.9 | 1.0 | 0.9 | 1.0 | 1.1 |
| Child marriage                 | 1.1 | 1.0 | 1.4  | 0.8 | 1.3 | 0.9 | 1.1 | 0.9  | 1.1  | 0.8 | 0.6 | 1.0 | 0.8 | 1.3  | 0.8 | 0.5  | 0.6 | 1.3 | 0.9 | 0.7 | 1.0 | 1.3  | 0.8 | 0.9 | 1.1  | 1.4 | 1.3 | 0.3  | 1.1 | 1.2 | 0.8 | 1.5 | 0.9 | 1.2 | 1.1 |
| Delayed breastfeeding          | 1.0 | 0.9 | 1.1  | 1.5 | 0.6 | 0.9 | 0.9 | 1.0  | 0.7  | 0.6 | 1.4 | 0.9 | 0.9 | 0.5  | 0.8 | 1.0  | 1.2 | 0.8 | 1.2 | 1.0 | 1.3 | 4.1  | 1.0 | 0.9 | 1.2  | 1.4 | 0.9 | 2.2  | 1.2 | 1.5 | 1.2 | 1.1 | 0.9 | 0.9 | 0.7 |
| FP need unsatisfied            | 1.0 | 1.2 | 1.0  | 1.3 | 0.8 | 0.8 | 0.8 | 0.9  | 0.8  | 0.8 | 1.2 | 1.0 | 0.9 | 1.0  | 1.4 | 0.2  | 0.9 | 1.1 | 0.8 | 0.7 | 0.7 | 0.4  | 0.9 | 1.0 | 1.3  | 1.0 | 1.2 | 2.2  | 0.8 | 0.9 | 1.1 | 0.9 | 0.7 | 1.1 | 0.3 |
| No vit A supplement            | 1.3 | 1.3 | 1.0  | 0.9 | 0.7 | 1.2 | 0.7 | 1.4  | 1.6  | 1.2 | 1.4 | 1.0 | 1.1 | 2.5  | 1.0 | 3.1  | 1.3 | 0.8 | 0.7 | 1.7 | 0.5 | 0.4  | 0.6 | 1.3 | 0.5  | 3.2 | 0.8 | 1.3  | 0.9 | 0.9 | 1.0 | 1.3 | 0.7 | 1.1 | 0.5 |
| No iodized salt                | 1.3 | 0.6 | 2.3  | 1.0 | 0.8 | 0.8 | 1.1 | 0.8  | 1.0  | 1.2 | 1.5 | 1.0 | 0.5 | 0.9  | 0.5 | 0.2  | 0.1 | 3.8 | 0.9 | 1.0 | 0.8 | 0.5  | 2.1 | 0.8 | 0.6  | 4.2 | 0.7 | 0.9  | 0.7 | 1.5 | 1.0 | 0.9 | 1.5 | 1.5 | 2.3 |
| Unsafe water                   | 1.1 | 0.9 | 1.5  | 0.7 | 1.1 | 0.9 | 1.0 | 1.3  | 1.1  | 0.8 | 0.8 | 1.1 | 1.0 | 0.6  | 0.9 | 1.0  | 0.9 | 1.4 | 0.6 | 0.8 | 1.2 | 0.6  | 1.1 | 1.0 | 2.0  | 0.9 | 1.2 | 0.6  | 0.8 | 0.9 | 1.1 | 1.0 | 1.3 | 1.1 | 1.0 |
| No care seeking for susp pneu  | 1.7 | 1.2 | 1.2  | 1.0 | 1.0 | 0.9 | 1.0 | 1.9  | 2.8  | 1.0 | 0.8 | 0.8 | 1.0 | 10.7 | 1.1 | 1.9  | 2.7 | 0.7 | 1.2 | 0.9 | 1.1 | 4.4  | 1.4 | 1.0 | 1.0  | 1.0 | 1.4 | 0.4  | 1.0 | 1.0 | 1.0 | 0.8 | 1.1 | 1.0 | 0.9 |

Label: odds ratios

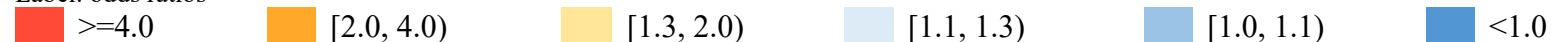

- Note:**
- BJ= Benin, BF= Burkina Faso, BI= Burundi, CM=Cameroon, CI=Côte d'Ivoire, CD=The Democratic Republic of the Congo, ET=Ethiopia, GM=Gambia, GH=Ghana, GN=Guinea, HT=Haiti, IN=India, KE=Kenya, KG=Kyrgyzstan, KM=Comoros, LS=Lesotho, LR=Liberia, MW=Malawi, ML=Mali, MZ=Mozambique, MM=Myanmar, NA=Namibia, NP=Nepal, NE=Niger, PE=Peru, ST= São Tomé and Príncipe, SL=Sierra Leone, SZ=Swaziland, TD=Chad, TJ=Tajikistan, TZ=Tanzania, TG=Togo, UG=Uganda, ZM=Zambia, ZW=Zimbabwe.
  - Short maternal stature: maternal height <145cm; low maternal BMI: maternal BMI <18.5 kg/m<sup>2</sup>; child marriage: mother's age at marriage <18 years old; delayed breastfeeding: child was not initially breastfed within one hour after born; infectious disease: child was caught by infectious diseases two weeks prior to the survey.
  - Abbreviations - HH: household, BMI: body mass index; SBA: skilled birth attendant; ANC: antenatal care; ORT: oral rehydration therapy; FP: family planning; vit: vitamin; susp pneu: suspected pneumonia.

**eFigure 7. Relative Ranking of 23 Factors Associated With Child Anthropometric Failures From Supplementary Analysis of Fully Adjusted Models for the Pooled Sample (n = 188,290)**

**A) stunting, B) underweight, and C) wasting, odds ratio (OR) and 95% confidence interval (CI)**

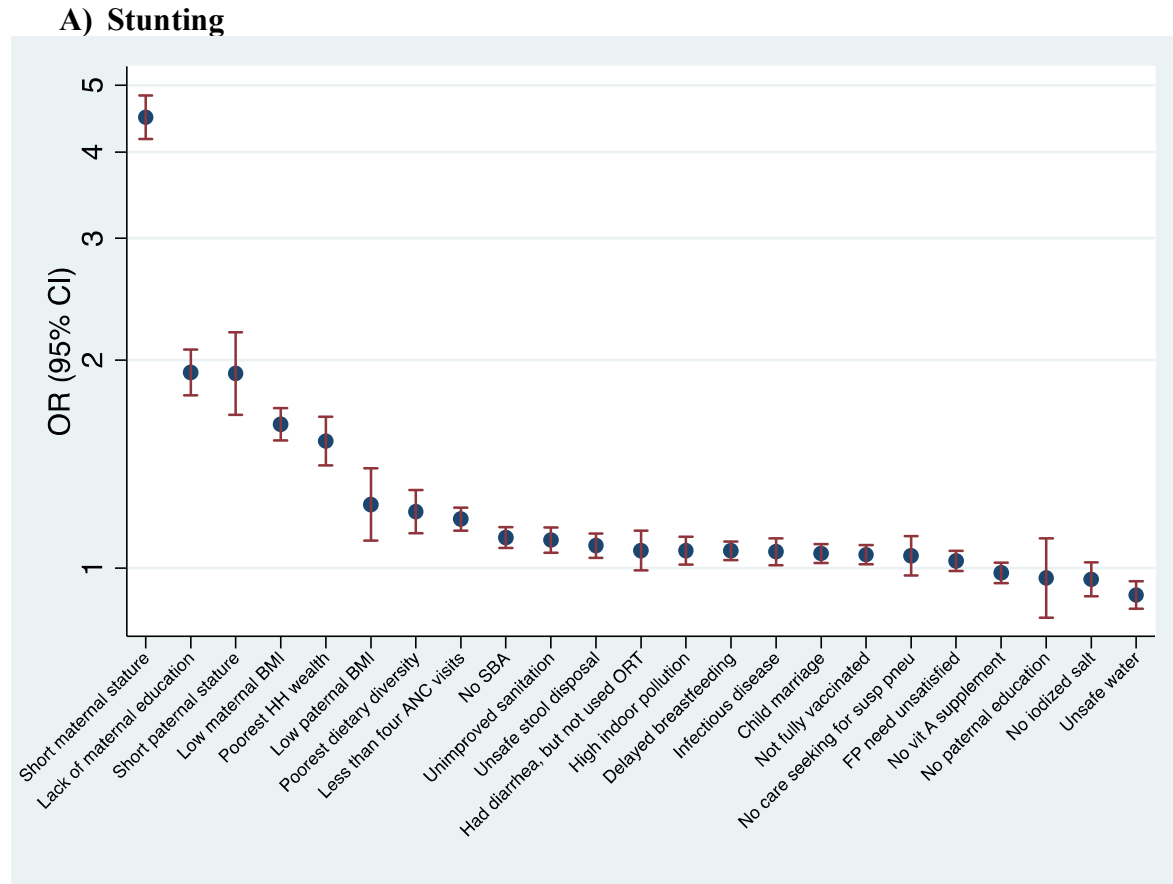

**Note:**

1. We use logarithmic scale for the y axis.
2. Short maternal stature: maternal height <145cm; low maternal BMI: maternal BMI <18.5 kg/m<sup>2</sup>; child marriage: mother's age at marriage <18 years old; delayed breastfeeding: child was not initially breastfed within one hour after born; infectious disease: child was caught by infectious diseases two weeks prior to the survey,
3. Abbreviations - HH: household, BMI: body mass index; SBA: skilled birth attendant; ANC: antenatal care; ORT: oral rehydration therapy; FP: family planning; vit: vitamin; susp pneu: suspected pneumonia.



## B) Underweight

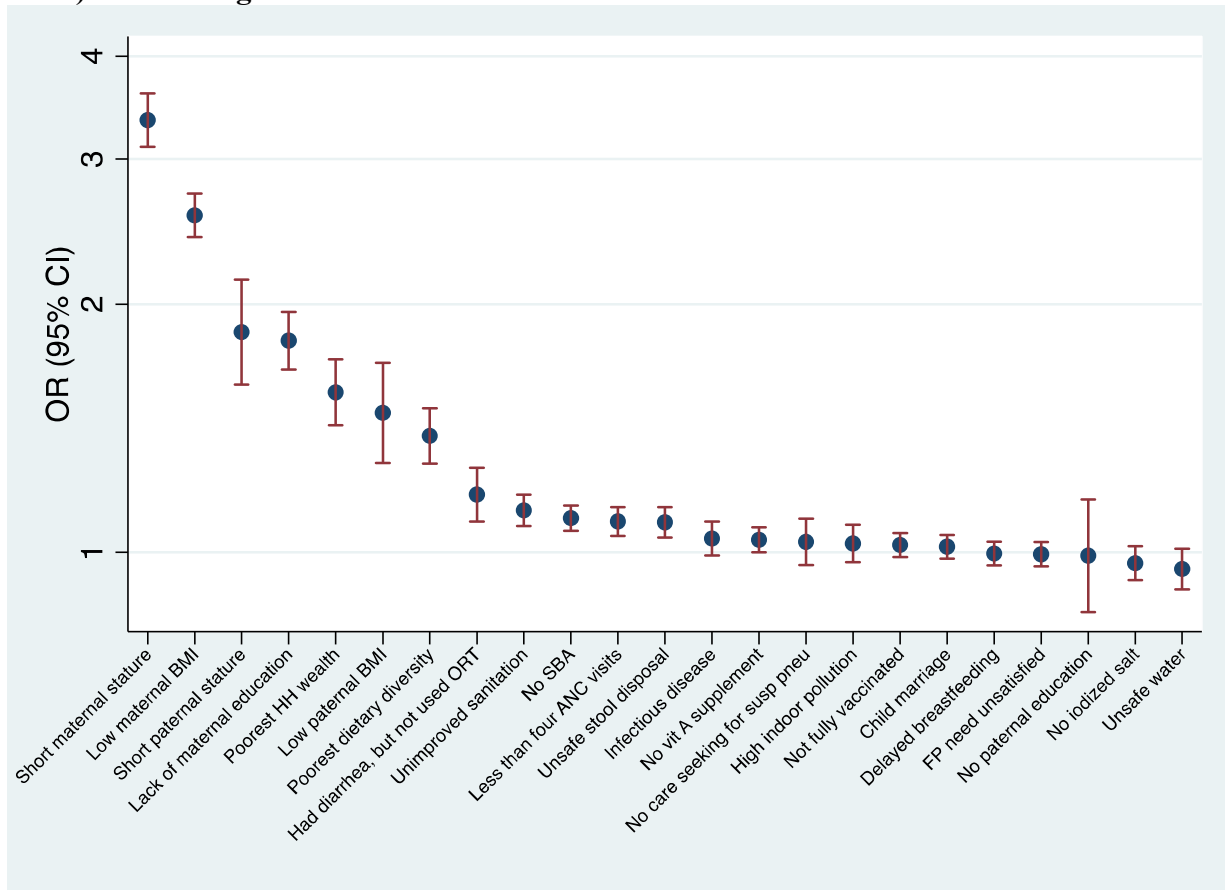

### C) Wasting

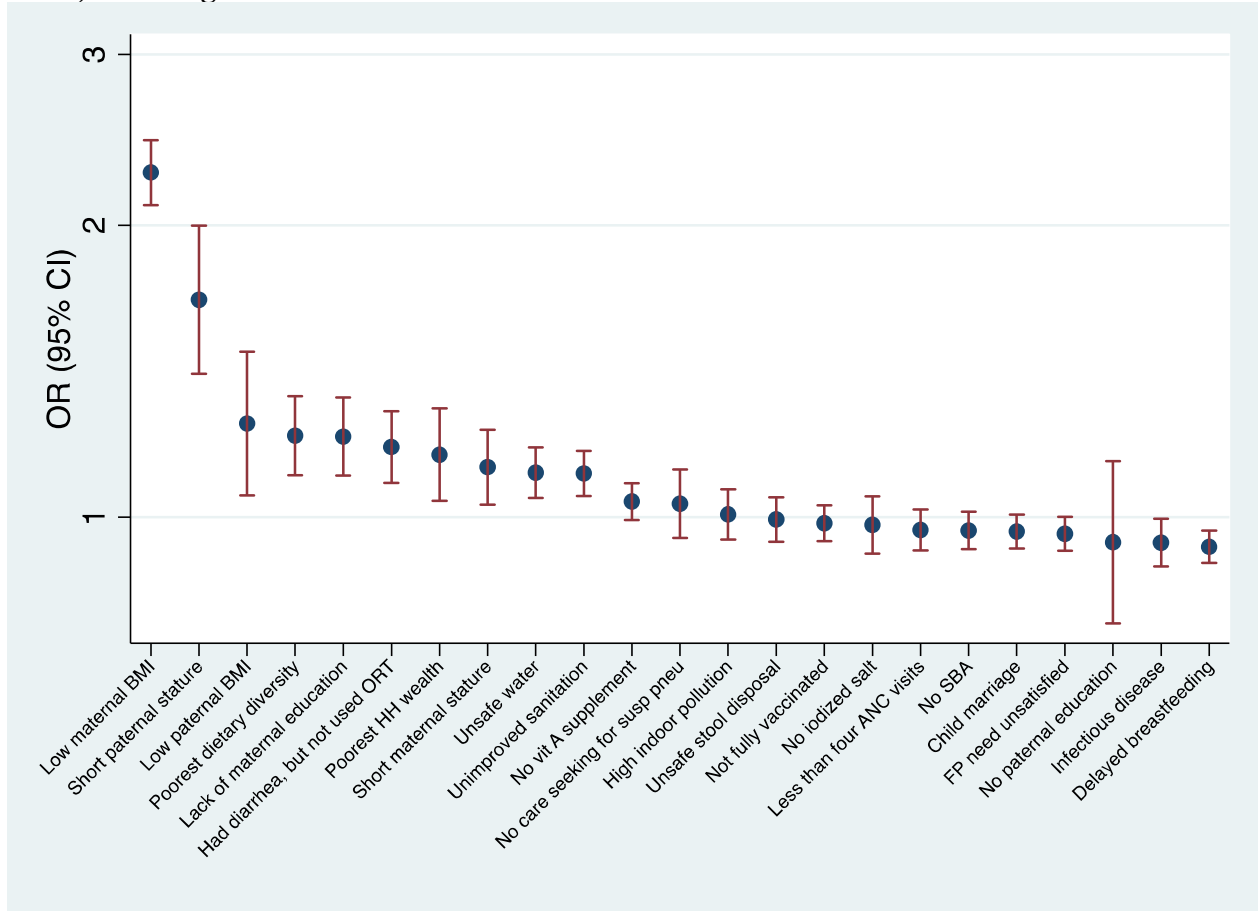

**eFigure 8. Country-Specific Ranking of 23 Factors Associated With Child Anthropometric Failures From Supplementary Analysis of Fully Adjusted Models on Stunting, Underweight, and Wasting in 12 Countries**

**A) Stunting**

|                                | ET | GH | IN | LS | LR | NA | NP | ST | SL | SZ | UG | ZW |
|--------------------------------|----|----|----|----|----|----|----|----|----|----|----|----|
| Short maternal stature         | 1  | 1  | 1  | 6  | 1  | 2  | 1  | 3  | 3  | 1  | 1  | 1  |
| Lack of maternal education     | 4  | 2  | 2  | 3  | 2  | 7  | 6  | 13 | 1  | 4  | 2  | 2  |
| Poorest HH wealth              | 2  | 3  | 5  | 1  | 4  | 6  | 2  | 1  | 4  | 5  | 5  | 4  |
| Low maternal BMI               | 5  | 5  | 4  | 5  | 3  | 8  | 5  | 6  | 5  | 3  | 6  | 3  |
| Poor dietary diversity         | 3  | 14 | 7  | 15 | 8  | 21 | 22 | 8  | 13 | 22 | 7  | 16 |
| No SBA                         | 13 | 4  | 12 | 9  | 19 | 17 | 15 | 14 | 15 | 7  | 11 | 9  |
| Less than four ANC visits      | 20 | 8  | 8  | 7  | 17 | 12 | 13 | 19 | 9  | 18 | 4  | 6  |
| Unimprovned sanitation         | 7  | 17 | 11 | 19 | 13 | 13 | 4  | 23 | 17 | 20 | 16 | 8  |
| Had diarrhea, but not used ORT | 11 | 23 | 9  | 4  | 10 | 3  | 20 | 17 | 22 | 6  | 15 | 23 |
| Unsafe stool disposal          | 23 | 7  | 10 | 14 | 16 | 10 | 7  | 5  | 19 | 17 | 8  | 13 |
| High indoor pollution          | 19 | 18 | 14 | 22 | 18 | 5  | 14 | 20 | 23 | 21 | 14 | 5  |
| Not fully vaccinated           | 17 | 6  | 17 | 17 | 15 | 9  | 18 | 7  | 12 | 10 | 21 | 11 |
| Infectious disease             | 8  | 10 | 16 | 23 | 11 | 11 | 8  | 4  | 18 | 19 | 20 | 7  |
| Child marriage                 | 18 | 11 | 13 | 13 | 21 | 22 | 16 | 9  | 14 | 13 | 18 | 10 |
| Delayed breastfeeding          | 9  | 16 | 15 | 12 | 9  | 14 | 17 | 12 | 8  | 15 | 17 | 14 |
| FP need unsatisfied            | 10 | 20 | 18 | 20 | 14 | 16 | 11 | 21 | 7  | 12 | 12 | 17 |
| No vit A supplement            | 22 | 9  | 19 | 21 | 12 | 19 | 12 | 11 | 10 | 11 | 19 | 15 |
| No iodized salt                | 15 | 13 | 20 | 11 | 23 | 23 | 23 | 18 | 6  | 8  | 10 | 22 |
| Unsafe water                   | 16 | 22 | 23 | 16 | 20 | 20 | 9  | 15 | 11 | 16 | 13 | 21 |
| No care seeking for susp pneu  | 14 | 21 | 21 | 10 | 22 | 18 | 19 | 16 | 20 | 14 | 23 | 19 |
| Short paternal stature         | 6  | 19 | 3  | 2  | 5  | 1  | 3  | 2  | 2  | 2  | 3  | 20 |
| Low paternal BMI               | 12 | 12 | 6  | 18 | 6  | 4  | 10 | 22 | 16 | 23 | 9  | 12 |
| Lack of paternal education     | 21 | 15 | 22 | 8  | 7  | 15 | 21 | 10 | 21 | 9  | 22 | 18 |

**Label:**

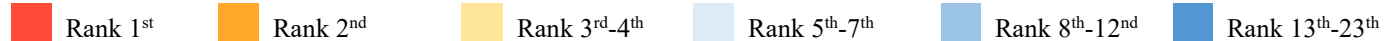

**Note:**

1. ET=Ethiopia, GH=Ghana, IN=India, LS=Lesotho, LR=Liberia, NA=Namibia, NP=Nepal, ST= São Tomé and Príncipe, SL=Sierra Leone, SZ=Swaziland, UG=Uganda, ZW=Zimbabwe.
2. Short maternal stature: maternal height <145cm; low maternal BMI: maternal BMI <18.5 kg/m<sup>2</sup>; child marriage: mother's age at marriage <18 years old; delayed breastfeeding: child was not initially breastfed within one hour after born; infectious disease: child was caught by infectious diseases two weeks prior to the survey; short paternal stature: paternal height <155cm; low paternal BMI: paternal BMI <18.5 kg/m<sup>2</sup>.
3. Abbreviations - HH: household, BMI: body mass index; SBA: skilled birth attendant; ANC: antenatal care; ORT: oral rehydration therapy; FP: family planning; vit: vitamin; susp pneu: suspected pneumonia.

## B) Underweight

|                                | ET | GH | IN | LS | LR | NA | NP | ST | SL | SZ | UG | ZW |
|--------------------------------|----|----|----|----|----|----|----|----|----|----|----|----|
| Short maternal stature         | 1  | 3  | 1  | 3  | 1  | 20 | 3  | 5  | 3  | 3  | 1  | 17 |
| Lack of maternal education     | 2  | 1  | 4  | 1  | 13 | 12 | 9  | 21 | 23 | 6  | 2  | 5  |
| Poorest HH wealth              | 8  | 18 | 6  | 4  | 15 | 6  | 14 | 2  | 15 | 2  | 4  | 20 |
| Low maternal BMI               | 3  | 2  | 2  | 6  | 2  | 8  | 1  | 3  | 1  | 4  | 3  | 1  |
| Poor dietary diversity         | 5  | 8  | 7  | 22 | 5  | 16 | 8  | 18 | 11 | 15 | 8  | 23 |
| No SBA                         | 15 | 5  | 12 | 9  | 14 | 10 | 15 | 11 | 17 | 8  | 9  | 13 |
| Less than four ANC visits      | 4  | 17 | 10 | 12 | 17 | 18 | 10 | 17 | 6  | 22 | 5  | 12 |
| Unimproved sanitation          | 9  | 14 | 9  | 15 | 9  | 19 | 4  | 20 | 8  | 18 | 21 | 9  |
| Had diarrhea, but not used ORT | 6  | 22 | 8  | 5  | 7  | 4  | 22 | 6  | 5  | 5  | 13 | 22 |
| Unsafe stool disposal          | 12 | 7  | 11 | 11 | 12 | 3  | 16 | 10 | 22 | 14 | 7  | 18 |
| High indoor pollution          | 22 | 9  | 14 | 16 | 23 | 2  | 6  | 23 | 18 | 21 | 14 | 10 |
| Not fully vaccinated           | 14 | 12 | 16 | 18 | 16 | 11 | 18 | 7  | 10 | 9  | 17 | 16 |
| Infectious disease             | 20 | 4  | 15 | 20 | 11 | 22 | 7  | 22 | 21 | 19 | 22 | 8  |
| Child marriage                 | 18 | 23 | 17 | 10 | 19 | 21 | 20 | 8  | 19 | 16 | 19 | 11 |
| Delayed breastfeeding          | 17 | 21 | 18 | 8  | 10 | 9  | 19 | 12 | 13 | 11 | 11 | 14 |
| FP need unsatisfied            | 13 | 20 | 19 | 17 | 8  | 14 | 21 | 19 | 12 | 7  | 18 | 7  |
| No vit A supplement            | 21 | 13 | 13 | 21 | 18 | 13 | 11 | 4  | 16 | 20 | 10 | 21 |
| No iodized salt                | 10 | 6  | 21 | 14 | 22 | 17 | 13 | 13 | 14 | 12 | 15 | 6  |
| Unsafe water                   | 19 | 16 | 20 | 13 | 21 | 15 | 12 | 9  | 7  | 10 | 12 | 15 |
| No care seeking for susp pneu  | 16 | 19 | 23 | 19 | 20 | 1  | 17 | 16 | 9  | 17 | 20 | 19 |
| Short paternal stature         | 11 | 15 | 3  | 2  | 3  | 7  | 2  | 1  | 2  | 1  | 16 | 2  |
| Low paternal BMI               | 7  | 11 | 5  | 7  | 4  | 5  | 5  | 15 | 20 | 13 | 6  | 3  |
| Lack of paternal education     | 23 | 10 | 22 | 23 | 6  | 23 | 23 | 14 | 4  | 23 | 23 | 4  |

**Label:**

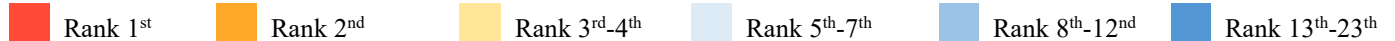

### C) Wasting

|                                | ET | GH | IN | LS | LR | NA | NP | ST | SL | SZ | UG | ZW |
|--------------------------------|----|----|----|----|----|----|----|----|----|----|----|----|
| Short maternal stature         | 7  | 12 | 7  | 9  | 1  | 11 | 22 | 22 | 23 | 14 | 4  | 3  |
| Lack of maternal education     | 4  | 1  | 5  | 12 | 16 | 2  | 8  | 4  | 4  | 23 | 15 | 13 |
| Poorest HH wealth              | 5  | 14 | 6  | 15 | 20 | 1  | 23 | 19 | 20 | 4  | 2  | 6  |
| Low maternal BMI               | 1  | 2  | 1  | 8  | 3  | 8  | 3  | 11 | 1  | 2  | 1  | 2  |
| Poor dietary diversity         | 8  | 23 | 4  | 3  | 6  | 22 | 2  | 21 | 3  | 9  | 16 | 4  |
| No SBA                         | 10 | 6  | 18 | 7  | 11 | 9  | 17 | 12 | 13 | 21 | 8  | 17 |
| Less than four ANC visits      | 2  | 4  | 21 | 18 | 13 | 7  | 15 | 1  | 11 | 22 | 21 | 8  |
| Unimproved sanitation          | 21 | 7  | 9  | 2  | 10 | 19 | 5  | 5  | 5  | 11 | 9  | 9  |
| Had diarrhea, but not used ORT | 9  | 5  | 11 | 11 | 7  | 12 | 13 | 13 | 2  | 1  | 20 | 19 |
| Unsafe stool disposal          | 11 | 16 | 13 | 19 | 18 | 6  | 12 | 9  | 8  | 12 | 11 | 18 |
| High indoor pollution          | 6  | 20 | 12 | 16 | 14 | 18 | 6  | 20 | 15 | 16 | 22 | 7  |
| Not fully vaccinated           | 17 | 19 | 14 | 5  | 17 | 14 | 18 | 10 | 14 | 17 | 19 | 20 |
| Infectious disease             | 19 | 22 | 16 | 20 | 21 | 20 | 7  | 18 | 12 | 13 | 13 | 11 |
| Child marriage                 | 12 | 9  | 19 | 17 | 22 | 10 | 20 | 8  | 7  | 20 | 14 | 10 |
| Delayed breastfeeding          | 16 | 17 | 22 | 6  | 8  | 4  | 16 | 7  | 16 | 7  | 12 | 16 |
| FP need unsatisfied            | 18 | 15 | 17 | 22 | 15 | 21 | 19 | 14 | 9  | 6  | 18 | 23 |
| No vit A supplement            | 20 | 8  | 10 | 4  | 9  | 17 | 21 | 3  | 17 | 5  | 17 | 21 |
| No iodized salt                | 13 | 10 | 15 | 21 | 23 | 16 | 4  | 2  | 18 | 8  | 5  | 5  |
| Unsafe water                   | 14 | 13 | 8  | 13 | 19 | 15 | 14 | 17 | 10 | 18 | 6  | 12 |
| No care seeking for susp pneu  | 15 | 3  | 23 | 14 | 4  | 5  | 11 | 15 | 6  | 19 | 7  | 15 |
| Short paternal stature         | 22 | 11 | 2  | 10 | 2  | 3  | 10 | 6  | 21 | 15 | 10 | 1  |
| Low paternal BMI               | 3  | 18 | 3  | 23 | 5  | 23 | 1  | 23 | 22 | 3  | 3  | 22 |
| Lack of paternal education     | 23 | 21 | 20 | 1  | 12 | 13 | 9  | 16 | 19 | 10 | 23 | 14 |

**Label:**

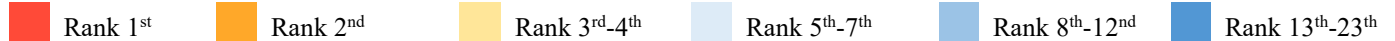

**eFigure 9. Country-Specific Odds Ratios for 23 Factors Associated With Child Anthropometric Failures From Supplementary Analysis of Fully Adjusted Models on Stunting, Underweight, and Wasting in 12 Countries**

**A) Stunting**

|                                | ET  | GH  | IN  | LS   | LR  | NA  | NP  | ST  | SL  | SZ   | UG   | ZW  |
|--------------------------------|-----|-----|-----|------|-----|-----|-----|-----|-----|------|------|-----|
| Short maternal stature         | 3.0 | 6.4 | 4.4 | 2.6  | 3.8 | 3.6 | 9.2 | 3.0 | 2.3 | 10.5 | 11.7 | 6.1 |
| Lack of maternal education     | 1.8 | 4.0 | 1.9 | 6.9  | 2.7 | 2.1 | 1.4 | 1.1 | 3.5 | 3.7  | 4.8  | 4.9 |
| Poorest HH wealth              | 2.1 | 1.8 | 1.4 | 20.8 | 2.0 | 2.2 | 3.3 | 6.5 | 1.6 | 3.0  | 2.2  | 1.8 |
| Low maternal BMI               | 1.6 | 1.5 | 1.6 | 4.0  | 2.1 | 1.9 | 1.5 | 2.1 | 1.4 | 5.0  | 1.4  | 2.1 |
| Poor dietary diversity         | 2.0 | 1.0 | 1.2 | 0.9  | 1.2 | 0.8 | 0.7 | 2.0 | 1.1 | 0.6  | 1.3  | 1.0 |
| No SBA                         | 1.0 | 1.8 | 1.1 | 1.6  | 0.9 | 1.1 | 1.0 | 1.1 | 1.0 | 1.8  | 1.1  | 1.2 |
| Less than four ANC visits      | 0.9 | 1.2 | 1.2 | 2.4  | 1.0 | 1.4 | 1.0 | 0.6 | 1.1 | 1.0  | 3.4  | 1.4 |
| Unimproved sanitation          | 1.2 | 0.8 | 1.1 | 0.7  | 1.1 | 1.4 | 1.6 | 0.4 | 0.9 | 0.7  | 0.9  | 1.2 |
| Had diarrhea, but not used ORT | 1.1 | 0.5 | 1.1 | 6.5  | 1.2 | 3.0 | 0.7 | 0.9 | 0.4 | 2.5  | 0.9  | 0.7 |
| Unsafe stool disposal          | 0.7 | 1.3 | 1.1 | 0.9  | 1.0 | 1.6 | 1.2 | 2.2 | 0.9 | 1.0  | 1.2  | 1.0 |
| High indoor pollution          | 0.9 | 0.8 | 1.1 | 0.5  | 1.0 | 2.4 | 1.0 | 0.6 | 0.3 | 0.7  | 1.0  | 1.4 |
| Not fully vaccinated           | 1.0 | 1.4 | 1.0 | 0.7  | 1.1 | 1.8 | 0.8 | 2.0 | 1.1 | 1.5  | 0.8  | 1.1 |
| Infectious disease             | 1.1 | 1.1 | 1.1 | 0.5  | 1.1 | 1.5 | 1.2 | 2.5 | 0.9 | 0.8  | 0.8  | 1.3 |
| Child marriage                 | 0.9 | 1.1 | 1.1 | 1.0  | 0.8 | 0.6 | 0.9 | 1.4 | 1.0 | 1.3  | 0.9  | 1.2 |
| Delayed breastfeeding          | 1.1 | 0.8 | 1.1 | 1.0  | 1.2 | 1.4 | 0.9 | 1.2 | 1.2 | 1.1  | 0.9  | 1.0 |
| FP need unsatisfied            | 1.1 | 0.8 | 1.0 | 0.6  | 1.1 | 1.2 | 1.1 | 0.6 | 1.2 | 1.3  | 1.0  | 1.0 |
| No vit A supplement            | 0.8 | 1.1 | 1.0 | 0.6  | 1.1 | 1.0 | 1.1 | 1.2 | 1.1 | 1.5  | 0.8  | 1.0 |
| No iodized salt                | 1.0 | 1.0 | 1.0 | 1.3  | 0.6 | 0.5 | 0.6 | 0.6 | 1.4 | 1.7  | 1.1  | 0.9 |
| Unsafe water                   | 1.0 | 0.7 | 0.9 | 0.8  | 0.8 | 0.8 | 1.2 | 1.0 | 1.1 | 1.1  | 1.0  | 0.9 |
| No care seeking for susp pneu  | 1.0 | 0.8 | 0.9 | 1.4  | 0.8 | 1.1 | 0.8 | 1.0 | 0.8 | 1.2  | 0.7  | 1.0 |
| Short paternal stature         | 1.6 | 0.8 | 1.9 | 11.5 | 1.9 | 4.9 | 2.7 | 4.9 | 2.7 | 5.1  | 3.9  | 0.9 |
| Low paternal BMI               | 1.1 | 1.0 | 1.3 | 0.7  | 1.7 | 2.5 | 1.1 | 0.6 | 1.0 | 0.5  | 1.1  | 1.0 |
| Lack of paternal education     | 0.9 | 0.9 | 0.9 | 1.7  | 1.6 | 1.3 | 0.7 | 1.3 | 0.7 | 1.7  | 0.7  | 1.0 |

**Label: odds ratios**

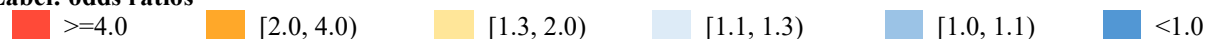

**Note:**

1. ET=Ethiopia, GH=Ghana, IN=India, LS=Lesotho, LR=Liberia, NA=Namibia, NP=Nepal, ST= São Tomé and Príncipe, SL=Sierra Leone, UG=Uganda ZW=Zimbabwe.
2. Short maternal stature: maternal height  $<145\text{cm}$ ; low maternal BMI: maternal BMI  $<18.5\text{ kg/m}^2$ ; child marriage: mother's age at marriage  $<18$  years old; delayed breastfeeding: child was not initially breastfed within one hour after born; infectious disease: child was caught by infectious diseases two weeks prior to the survey; short paternal stature: paternal height  $<155\text{cm}$ ; low paternal BMI: paternal BMI  $<18.5\text{ kg/m}^2$ .
3. Abbreviations - HH: household, BMI: body mass index; SBA: skilled birth attendant; ANC: antenatal care; ORT: oral rehydration therapy; FP: family planning; vit: vitamin; susp pneu: suspected pneumonia.

## B) Underweight

|                                | ET  | GH   | IN  | LS   | LR  | NA  | NP  | ST   | SL  | SW   | UG  | ZW  |
|--------------------------------|-----|------|-----|------|-----|-----|-----|------|-----|------|-----|-----|
| Short maternal stature         | 4.1 | 2.5  | 3.4 | 6.8  | 6.4 | 0.5 | 2.4 | 2.9  | 2.0 | 5.4  | 7.1 | 0.9 |
| Lack of maternal education     | 2.9 | 13.7 | 1.8 | 53.6 | 1.1 | 1.3 | 1.2 | 0.7  | 0.5 | 2.5  | 6.9 | 1.7 |
| Poorest HH wealth              | 1.7 | 0.9  | 1.5 | 6.1  | 1.1 | 2.3 | 1.1 | 6.9  | 1.2 | 7.7  | 2.8 | 0.7 |
| Low maternal BMI               | 2.7 | 4.2  | 2.5 | 2.5  | 5.2 | 1.6 | 3.5 | 5.9  | 2.3 | 3.7  | 3.2 | 6.3 |
| Poor dietary diversity         | 1.9 | 1.3  | 1.4 | 0.3  | 1.6 | 0.8 | 1.4 | 1.0  | 1.3 | 0.8  | 1.4 | 0.5 |
| No SBA                         | 1.0 | 1.5  | 1.1 | 1.1  | 1.1 | 1.4 | 1.0 | 1.4  | 1.0 | 1.4  | 1.3 | 1.2 |
| Less than four ANC visits      | 2.2 | 0.9  | 1.1 | 0.9  | 0.9 | 0.7 | 1.2 | 1.0  | 1.5 | 0.2  | 1.5 | 1.2 |
| Unimproved sanitation          | 1.3 | 1.0  | 1.1 | 0.8  | 1.4 | 0.5 | 1.8 | 0.8  | 1.4 | 0.7  | 0.8 | 1.3 |
| Had diarrhea, but not used ORT | 1.8 | 0.6  | 1.2 | 2.6  | 1.5 | 3.6 | 0.8 | 2.6  | 1.6 | 3.7  | 1.0 | 0.7 |
| Unsafe stool disposal          | 1.1 | 1.3  | 1.1 | 1.0  | 1.2 | 4.0 | 0.9 | 1.4  | 0.9 | 1.0  | 1.4 | 0.9 |
| High indoor pollution          | 0.7 | 1.2  | 1.0 | 0.7  | 0.1 | 4.5 | 1.5 | 0.4  | 1.0 | 0.3  | 1.0 | 1.3 |
| Not fully vaccinated           | 1.0 | 1.0  | 1.0 | 0.6  | 1.0 | 1.3 | 0.9 | 1.8  | 1.3 | 1.3  | 0.9 | 1.0 |
| Infectious disease             | 0.9 | 1.5  | 1.0 | 0.5  | 1.2 | 0.2 | 1.4 | 0.7  | 0.9 | 0.7  | 0.7 | 1.3 |
| Child marriage                 | 0.9 | 0.6  | 1.0 | 1.0  | 0.9 | 0.5 | 0.9 | 1.6  | 1.0 | 0.8  | 0.9 | 1.3 |
| Delayed breastfeeding          | 1.0 | 0.7  | 1.0 | 1.3  | 1.3 | 1.5 | 0.9 | 1.2  | 1.2 | 1.1  | 1.1 | 1.0 |
| FP need unsatisfied            | 1.0 | 0.8  | 1.0 | 0.7  | 1.4 | 1.0 | 0.8 | 0.8  | 1.3 | 1.8  | 0.9 | 1.6 |
| No vit A supplement            | 0.8 | 1.0  | 1.0 | 0.5  | 0.9 | 1.2 | 1.2 | 3.0  | 1.0 | 0.5  | 1.1 | 0.7 |
| No iodized salt                | 1.2 | 1.3  | 0.9 | 0.8  | 0.3 | 0.7 | 1.1 | 1.1  | 1.2 | 1.0  | 1.0 | 1.7 |
| Unsafe water                   | 0.9 | 1.0  | 1.0 | 0.9  | 0.7 | 0.9 | 1.1 | 1.5  | 1.5 | 1.1  | 1.1 | 1.0 |
| No care seeking for susp pneu  | 1.0 | 0.8  | 0.9 | 0.6  | 0.7 | 4.6 | 0.9 | 1.0  | 1.4 | 0.7  | 0.8 | 0.9 |
| Short paternal stature         | 1.1 | 1.0  | 1.9 | 8.1  | 2.2 | 1.9 | 3.0 | 47.0 | 2.2 | 70.4 | 0.9 | 2.8 |
| Low paternal BMI               | 1.7 | 1.1  | 1.6 | 1.8  | 2.1 | 2.4 | 1.5 | 1.0  | 0.9 | 1.0  | 1.4 | 1.8 |
| Lack of paternal education     | 0.5 | 1.1  | 0.9 | 0.3  | 1.5 | 0.1 | 0.8 | 1.0  | 1.8 | 0.0  | 0.5 | 1.8 |

Label: odds ratios

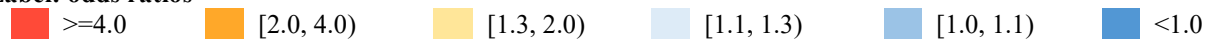

### C) Wasting

|                                | ET   | GH     | IN   | LS    | LR   | NA    | NP   | ST   | SL   | SW     | UG   | ZW   |
|--------------------------------|------|--------|------|-------|------|-------|------|------|------|--------|------|------|
| Short maternal stature         | 1.70 | 1.00   | 1.15 | 1.22  | 4.73 | 1.00  | 0.40 | 0.38 | 0.24 | 1.00   | 2.49 | 3.80 |
| Lack of maternal education     | 2.01 | 182.46 | 1.21 | 1.00  | 0.95 | 6.92  | 1.65 | 1.65 | 1.86 | 0.05   | 0.86 | 1.00 |
| Poorest HH wealth              | 1.87 | 0.87   | 1.16 | 0.80  | 0.76 | 43.61 | 0.36 | 0.78 | 0.73 | 14.68  | 4.09 | 1.80 |
| Low maternal BMI               | 3.74 | 4.22   | 2.28 | 1.24  | 2.78 | 1.80  | 2.10 | 1.13 | 2.34 | 135.21 | 5.89 | 4.73 |
| Poor dietary diversity         | 1.63 | 0.18   | 1.22 | 4.08  | 2.15 | 0.23  | 2.50 | 0.71 | 1.93 | 2.13   | 0.83 | 2.63 |
| No SBA                         | 1.32 | 1.85   | 0.96 | 1.49  | 1.06 | 1.31  | 1.00 | 1.06 | 1.09 | 0.18   | 1.07 | 0.65 |
| Less than four ANC visits      | 2.54 | 2.73   | 0.94 | 0.27  | 1.04 | 2.42  | 1.05 | 4.42 | 1.17 | 0.11   | 0.51 | 1.34 |
| Unimproved sanitation          | 0.72 | 1.56   | 1.10 | 20.05 | 1.15 | 0.39  | 1.82 | 1.62 | 1.63 | 2.08   | 1.01 | 1.24 |
| Had diarrhea, but not used ORT | 1.58 | 2.52   | 1.02 | 1.00  | 2.00 | 0.92  | 1.25 | 1.05 | 2.10 | 276.22 | 0.59 | 0.53 |
| Unsafe stool disposal          | 1.18 | 0.72   | 1.00 | 0.20  | 0.90 | 3.08  | 1.25 | 1.28 | 1.29 | 1.63   | 0.94 | 0.65 |
| High indoor pollution          | 1.87 | 0.32   | 1.01 | 0.53  | 1.00 | 0.40  | 1.77 | 0.77 | 1.00 | 0.91   | 0.48 | 1.76 |
| Not fully vaccinated           | 0.90 | 0.48   | 0.99 | 2.50  | 0.91 | 0.84  | 0.87 | 1.21 | 1.05 | 0.83   | 0.64 | 0.52 |
| Infectious disease             | 0.77 | 0.25   | 0.97 | 0.20  | 0.59 | 0.36  | 1.76 | 0.79 | 1.10 | 1.35   | 0.87 | 1.00 |
| Child marriage                 | 1.16 | 1.14   | 0.96 | 0.34  | 0.58 | 1.23  | 0.84 | 1.39 | 1.32 | 0.23   | 0.86 | 1.09 |
| Delayed breastfeeding          | 0.94 | 0.68   | 0.93 | 1.86  | 1.21 | 4.26  | 1.04 | 1.42 | 0.93 | 2.23   | 0.93 | 0.71 |
| FP need unsatisfied            | 0.83 | 0.76   | 0.96 | 0.10  | 0.99 | 0.30  | 0.84 | 1.04 | 1.28 | 2.83   | 0.68 | 0.34 |
| No vit A supplement            | 0.73 | 1.53   | 1.05 | 3.13  | 1.18 | 0.46  | 0.60 | 3.52 | 0.84 | 3.54   | 0.74 | 0.50 |
| No iodized salt                | 1.11 | 1.02   | 0.99 | 0.13  | 0.09 | 0.52  | 2.05 | 3.85 | 0.75 | 2.14   | 1.52 | 2.22 |
| Unsafe water                   | 1.05 | 1.00   | 1.11 | 0.89  | 0.88 | 0.68  | 1.09 | 0.94 | 1.23 | 0.64   | 1.36 | 1.00 |
| No care seeking for susp pneu  | 1.00 | 3.14   | 0.85 | 0.86  | 2.53 | 3.91  | 1.39 | 1.00 | 1.50 | 0.24   | 1.13 | 0.90 |
| Short paternal stature         | 0.44 | 1.00   | 1.74 | 1.00  | 3.52 | 6.86  | 1.42 | 1.46 | 0.64 | 1.00   | 1.00 | 6.76 |
| Low paternal BMI               | 2.51 | 0.67   | 1.27 | 0.09  | 2.37 | 0.19  | 2.90 | 0.16 | 0.58 | 30.16  | 3.63 | 0.42 |
| Lack of paternal education     | 0.27 | 0.26   | 0.95 | 32.41 | 1.05 | 0.90  | 1.48 | 1.00 | 0.74 | 2.08   | 0.22 | 1.00 |

Label: odds ratios

■  $\geq 4.0$

■ [2.0, 4.0)

■ [1.3, 2.0)

■ [1.1, 1.3)

■ [1.0, 1.1)

■  $< 1.0$



**eFigure 10. Relative Ranking of 20 Factors Associated With Child Anthropometric Failures From Fully Adjusted Models for Pooled Sample, Stratified by Children’s Age**

**A) stunting, B) underweight, and C) wasting, odds ratio (OR) and 95% confidence interval (CI)**

**A) Stunting**

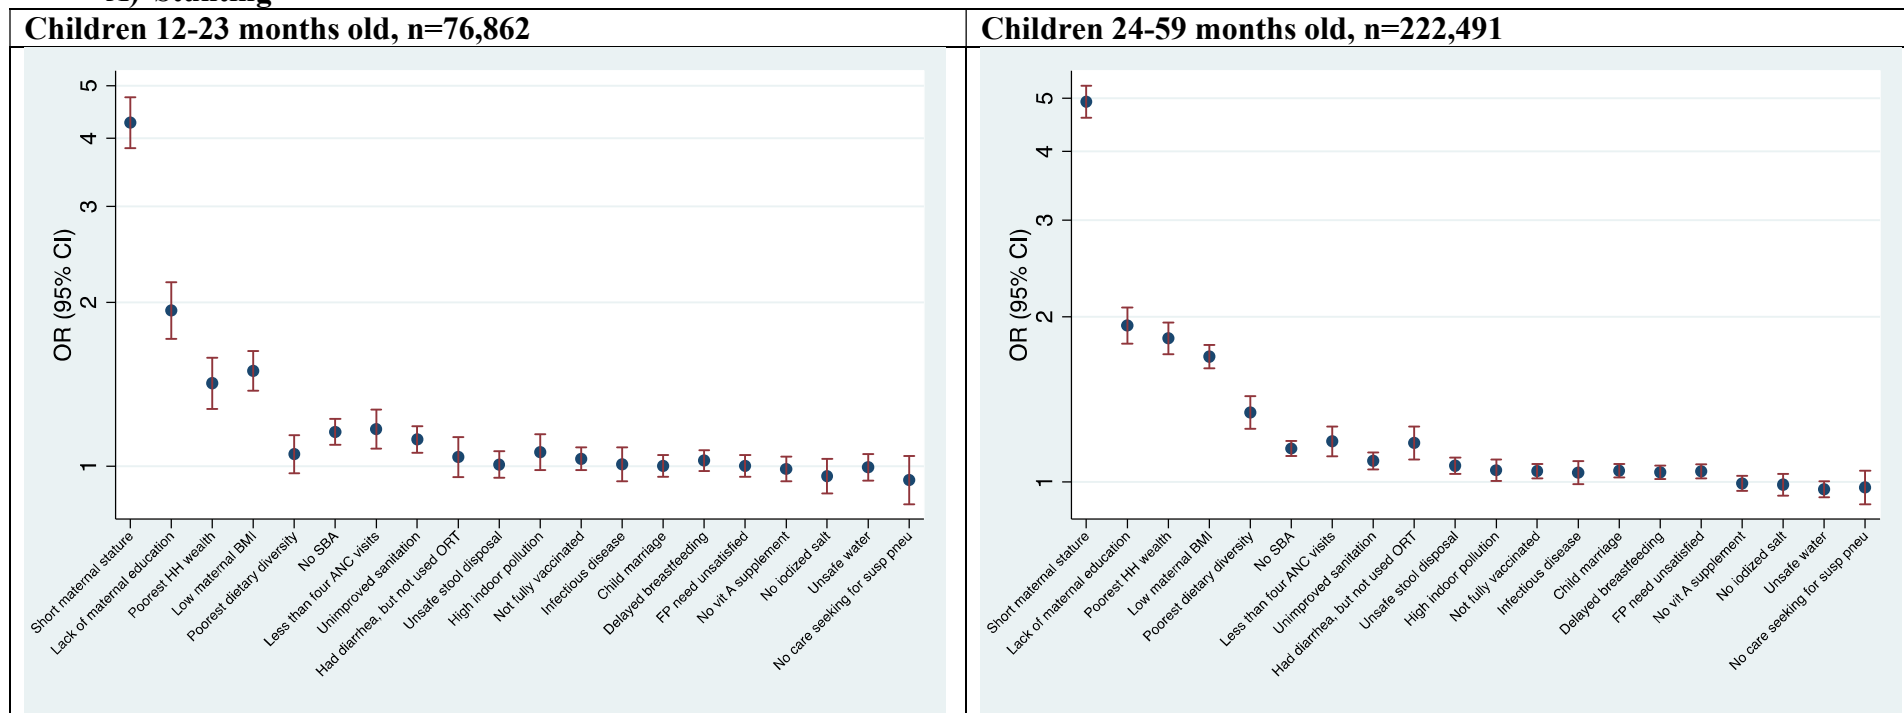

**Note:**

1. We use logarithmic scale for the y axis.
2. Short maternal stature: maternal height <145cm; low maternal BMI: maternal BMI <18.5 kg/m<sup>2</sup>; child marriage: mother’s age at marriage <18 years old; delayed breastfeeding: child was not initially breastfed within one hour after born; infectious disease: child was caught by infectious diseases two weeks prior to the survey.
3. Abbreviations - HH: household, BMI: body mass index; SBA: skilled birth attendant; ANC: antenatal care; ORT: oral rehydration therapy; FP: family planning; vit: vitamin; susp pneu: suspected pneumonia.

### B) Underweight

Children 12-23 months old, n=76,862

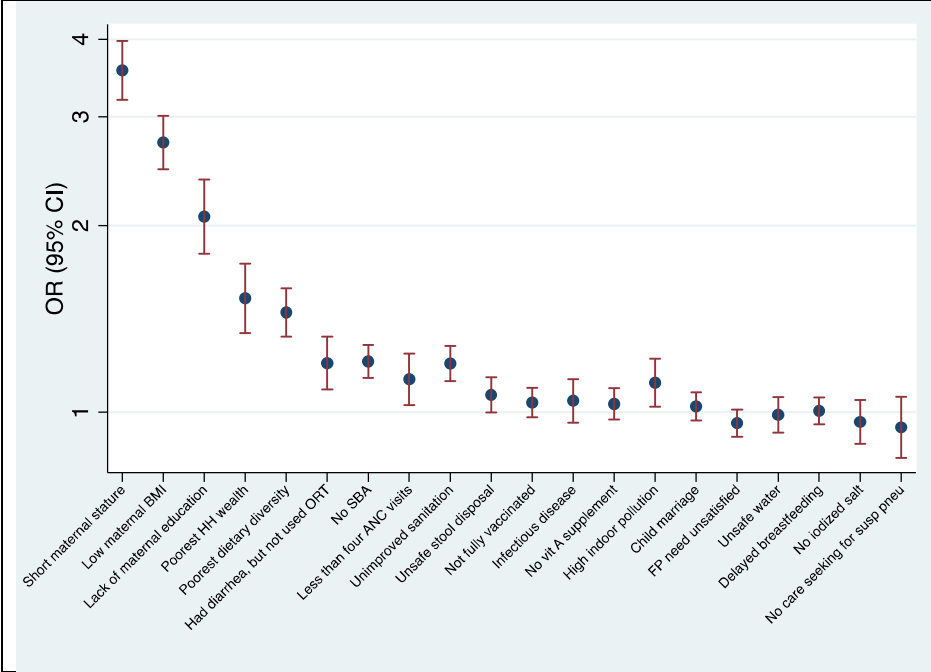

Children 24-59 months old, n=222,491

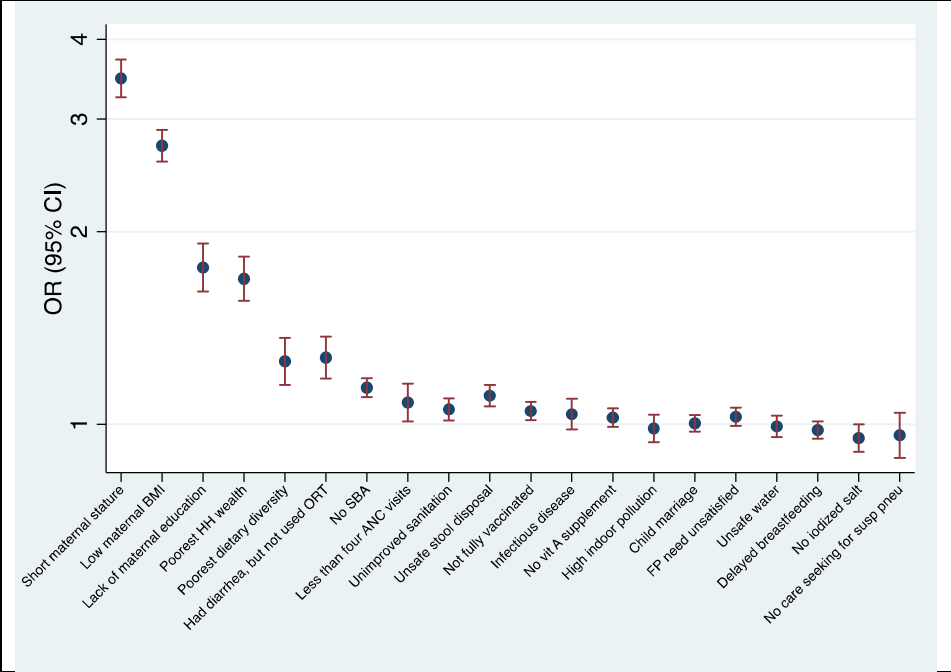

### C) Wasting

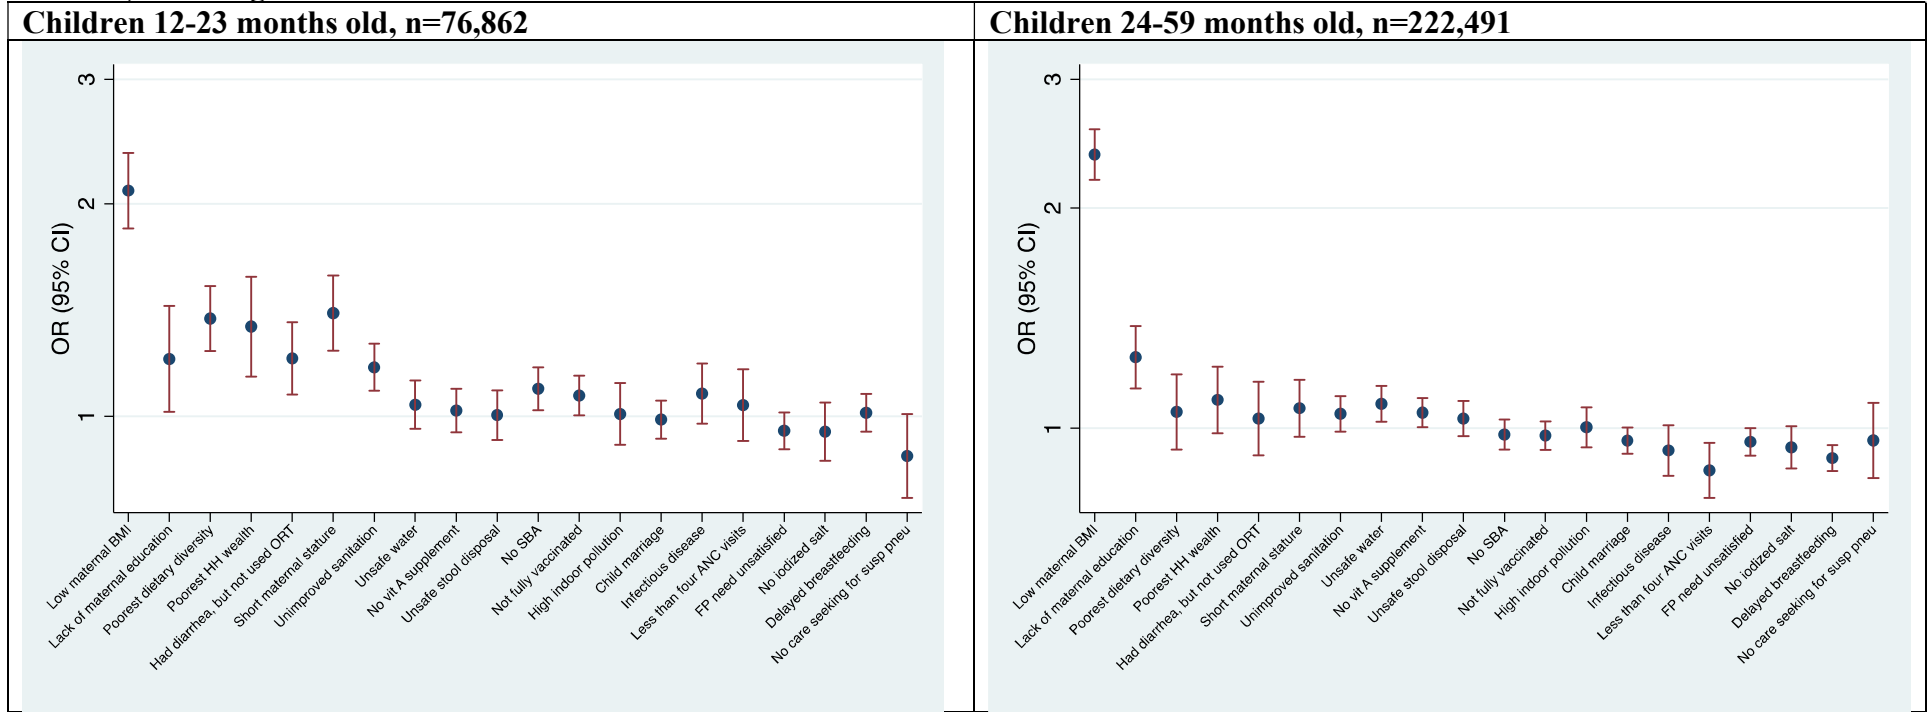

**eFigure 11. Country-Specific Ranking of 20 Factors Associated With Child Anthropometric Failures From Fully Adjusted Models, Stratified by Children’s Age**  
**A) stunting among children 12-23 months old, B) stunting among children 24-59 months old, C) underweight among children 12-23 months old, D) underweight among children 24-59 months old, E) wasting among children 12-23 months old, and F) wasting among children 24-59 months old**

**A) Stunting, children 12-23 months old, total n=76,862**

|                                | BJ | BF | BI | CM | CI | CD | ET | GM | GH | GN | HT | IN | KE | KG | KM | LS | LR | MW | ML | MZ | MM | NA | NP | NE | PE | ST | SL | SZ | TD | TJ | TZ | TG | UG | ZM | ZW |
|--------------------------------|----|----|----|----|----|----|----|----|----|----|----|----|----|----|----|----|----|----|----|----|----|----|----|----|----|----|----|----|----|----|----|----|----|----|----|
| Short maternal stature         | 1  | 5  | 1  | 13 | 3  | 2  | 1  | 1  | 1  | 8  | 2  | 1  | 1  | 3  | 13 | 5  | 2  | 1  | 13 | 2  | 1  | 10 | 1  | 2  | 1  | 1  | 4  | 3  | 1  | 4  | 1  | 14 | 3  | 1  | 2  |
| Lack of maternal education     | 3  | 1  | 18 | 1  | 8  | 1  | 2  | 20 | 13 | 4  | 6  | 2  | 3  | 16 | 3  | 7  | 18 | 3  | 2  | 1  | 10 | 20 | 6  | 4  | 3  | 9  | 14 | 4  | 16 | 1  | 19 | 20 | 1  | 5  | 1  |
| Poorest HH wealth              | 8  | 11 | 2  | 2  | 19 | 4  | 3  | 16 | 3  | 2  | 1  | 4  | 2  | 8  | 2  | 1  | 1  | 7  | 1  | 4  | 20 | 1  | 2  | 20 | 2  | 3  | 12 | 2  | 18 | 18 | 3  | 7  | 17 | 12 | 3  |
| Low maternal BMI               | 5  | 3  | 3  | 5  | 2  | 5  | 4  | 3  | 20 | 3  | 7  | 3  | 13 | 1  | 1  | 2  | 17 | 2  | 3  | 15 | 2  | 7  | 20 | 1  | 5  | 7  | 16 | 10 | 7  | 6  | 5  | 2  | 4  | 2  | 4  |
| Poor dietary diversity         | 18 | 4  | 6  | 12 | 18 | 16 | 6  | 8  | 15 | 9  | 3  | 11 | 20 | 2  | 16 | 6  | 20 | 15 | 5  | 9  | 19 | 9  | 3  | 3  | 8  | 2  | 19 | 18 | 3  | 5  | 2  | 9  | 19 | 11 | 20 |
| No SBA                         | 6  | 6  | 5  | 8  | 17 | 10 | 7  | 12 | 4  | 15 | 10 | 7  | 6  | 11 | 18 | 8  | 11 | 5  | 9  | 5  | 7  | 17 | 13 | 16 | 4  | 13 | 5  | 12 | 5  | 15 | 15 | 11 | 12 | 3  | 8  |
| Less than four ANC visits      | 2  | 20 | 20 | 4  | 1  | 3  | 20 | 4  | 2  | 1  | 17 | 6  | 4  | 19 | 7  | 4  | 7  | 20 | 18 | 6  | 4  | 2  | 9  | 7  | 9  | 19 | 11 | 19 | 20 | 8  | 4  | 1  | 2  | 7  | 5  |
| Unimproved sanitation          | 13 | 8  | 15 | 19 | 15 | 11 | 5  | 5  | 19 | 5  | 8  | 5  | 11 | 9  | 9  | 17 | 12 | 12 | 20 | 10 | 18 | 12 | 12 | 15 | 18 | 15 | 6  | 13 | 10 | 7  | 12 | 17 | 8  | 6  | 7  |
| Had diarrhea, but not used ORT | 7  | 19 | 7  | 10 | 4  | 17 | 11 | 11 | 18 | 19 | 16 | 12 | 7  | 12 | 5  | 3  | 16 | 4  | 19 | 8  | 13 | 4  | 18 | 14 | 10 | 6  | 20 | 9  | 2  | 2  | 6  | 19 | 11 | 18 | 19 |
| Unsafe stool disposal          | 16 | 7  | 4  | 7  | 9  | 15 | 16 | 6  | 8  | 17 | 9  | 13 | 16 | 17 | 14 | 16 | 9  | 6  | 10 | 17 | 16 | 3  | 4  | 6  | 19 | 11 | 8  | 15 | 8  | 3  | 10 | 10 | 5  | 9  | 14 |
| High indoor pollution          | 4  | 16 | 13 | 3  | 6  | 19 | 19 | 18 | 7  | 20 | 19 | 9  | 8  | 6  | 19 | 18 | 14 | 19 | 7  | 3  | 5  | 16 | 16 | 18 | 16 | 20 | 13 | 20 | 4  | 14 | 8  | 13 | 20 | 4  | 10 |
| Not fully vaccinated           | 12 | 12 | 16 | 11 | 16 | 14 | 15 | 13 | 9  | 18 | 13 | 10 | 9  | 10 | 4  | 12 | 4  | 14 | 16 | 16 | 14 | 5  | 15 | 13 | 13 | 5  | 7  | 5  | 9  | 13 | 14 | 8  | 15 | 15 | 17 |
| Infectious disease             | 10 | 2  | 10 | 16 | 20 | 8  | 12 | 9  | 16 | 6  | 12 | 15 | 17 | 20 | 8  | 15 | 19 | 17 | 6  | 11 | 17 | 6  | 8  | 9  | 20 | 8  | 2  | 16 | 19 | 20 | 17 | 18 | 9  | 10 | 6  |
| Child marriage                 | 11 | 15 | 8  | 20 | 11 | 9  | 18 | 15 | 14 | 16 | 20 | 8  | 15 | 14 | 11 | 13 | 8  | 16 | 17 | 14 | 8  | 18 | 14 | 8  | 14 | 10 | 17 | 6  | 13 | 17 | 20 | 16 | 16 | 14 | 12 |
| Delayed breastfeeding          | 15 | 17 | 14 | 17 | 13 | 7  | 8  | 10 | 10 | 11 | 4  | 14 | 10 | 7  | 12 | 9  | 5  | 10 | 11 | 12 | 6  | 11 | 17 | 11 | 17 | 16 | 1  | 11 | 17 | 9  | 16 | 15 | 7  | 8  | 9  |
| FP need unsatisfied            | 9  | 9  | 9  | 18 | 14 | 18 | 9  | 7  | 17 | 14 | 5  | 16 | 18 | 4  | 10 | 20 | 6  | 13 | 15 | 18 | 12 | 15 | 5  | 10 | 7  | 17 | 10 | 14 | 14 | 12 | 13 | 4  | 14 | 19 | 11 |
| No vit A supplement            | 20 | 14 | 11 | 15 | 5  | 6  | 17 | 2  | 11 | 7  | 18 | 17 | 19 | 15 | 6  | 19 | 13 | 11 | 12 | 19 | 3  | 19 | 11 | 5  | 6  | 4  | 3  | 1  | 6  | 16 | 18 | 6  | 10 | 17 | 13 |
| No iodized salt                | 17 | 18 | 19 | 6  | 7  | 20 | 10 | 17 | 5  | 13 | 15 | 20 | 12 | 18 | 15 | 11 | 15 | 9  | 8  | 13 | 11 | 13 | 7  | 17 | 12 | 18 | 15 | 17 | 15 | 19 | 7  | 12 | 13 | 20 | 15 |
| Unsafe water                   | 14 | 13 | 12 | 9  | 10 | 13 | 13 | 14 | 12 | 10 | 14 | 18 | 5  | 13 | 20 | 10 | 10 | 18 | 14 | 7  | 9  | 14 | 10 | 12 | 15 | 14 | 9  | 8  | 11 | 10 | 9  | 5  | 6  | 16 | 18 |
| No care seeking for susp pneu  | 19 | 10 | 17 | 14 | 12 | 12 | 14 | 19 | 6  | 12 | 11 | 19 | 14 | 5  | 17 | 14 | 3  | 8  | 4  | 20 | 15 | 8  | 19 | 19 | 11 | 12 | 18 | 7  | 12 | 11 | 11 | 3  | 18 | 13 | 16 |

**Label:**  
 Rank 1<sup>st</sup>
 Rank 2<sup>nd</sup>
 Rank 3<sup>rd</sup>-4<sup>th</sup>
 Rank 5<sup>th</sup>-7<sup>th</sup>
 Rank 8<sup>th</sup>-12<sup>nd</sup>
 Rank 13<sup>th</sup>-20<sup>th</sup>

- Note:**
1. BJ= Benin, BF= Burkina Faso, BI= Burundi, CM=Cameroon, CI=Côte d'Ivoire, CD=The Democratic Republic of the Congo, ET=Ethiopia, GM=Gambia, GH=Ghana, GN=Guinea, HT=Haiti, IN=India, KE=Kenya, KG=Kyrgyzstan, KM=Comoros, LS=Lesotho, LR=Liberia, MW=Malawi, ML=Mali, MZ=Mozambique, MM=Myanmar, NA=Namibia, NP=Nepal, NE=Niger, PE=Peru, ST= São Tomé and Príncipe, SL=Sierra Leone, SZ=Swaziland, TD=Chad, TJ=Tajikistan, TZ=Tanzania, TG=Togo, UG=Uganda, ZM=Zambia, ZW=Zimbabwe.
  2. Short maternal stature: maternal height <145cm; low maternal BMI: maternal BMI <18.5 kg/m<sup>2</sup>; child marriage: mother’s age at marriage <18 years old; delayed breastfeeding: child was not initially breastfed within one hour after born; infectious disease: child was caught by infectious diseases two weeks prior to the survey.
  3. Abbreviations - HH: household, BMI: body mass index; SBA: skilled birth attendant; ANC: antenatal care; ORT: oral rehydration therapy; FP: family planning; vit: vitamin; susp pneu: suspected pneumonia.

**B) Stunting, children 24-59 months old, total n=222,491**

|                                | BJ | BF | BI | CM | CI | CD | ET | GM | GH | GN | HT | IN | KE | KG | KM | LS | LR | MW | ML | MZ | MM | NA | NP | NE | PE | ST | SL | SZ | TD | TJ | TZ | TG | UG | ZM | ZW |
|--------------------------------|----|----|----|----|----|----|----|----|----|----|----|----|----|----|----|----|----|----|----|----|----|----|----|----|----|----|----|----|----|----|----|----|----|----|----|
| Short maternal stature         | 1  | 1  | 1  | 1  | 2  | 2  | 1  | 18 | 2  | 19 | 1  | 1  | 1  | 1  | 6  | 6  | 1  | 1  | 3  | 1  | 1  | 6  | 1  | 4  | 1  | 2  | 2  | 1  | 7  | 1  | 1  | 1  | 1  | 1  | 1  |
| Lack of maternal education     | 5  | 2  | 2  | 4  | 1  | 11 | 4  | 6  | 1  | 7  | 6  | 2  | 10 | 18 | 1  | 2  | 4  | 2  | 1  | 5  | 9  | 15 | 5  | 2  | 3  | 14 | 1  | 3  | 1  | 11 | 2  | 8  | 3  | 3  | 2  |
| Poorest HH wealth              | 2  | 3  | 3  | 2  | 4  | 3  | 3  | 1  | 4  | 3  | 2  | 4  | 2  | 11 | 9  | 1  | 3  | 4  | 2  | 2  | 2  | 1  | 2  | 10 | 2  | 1  | 4  | 6  | 12 | 5  | 3  | 2  | 2  | 2  | 5  |
| Low maternal BMI               | 4  | 4  | 4  | 5  | 3  | 4  | 5  | 17 | 3  | 18 | 3  | 3  | 3  | 2  | 3  | 4  | 2  | 5  | 6  | 3  | 3  | 2  | 3  | 8  | 4  | 7  | 3  | 2  | 3  | 2  | 4  | 3  | 6  | 4  | 3  |
| Poor dietary diversity         | 13 | 7  | 16 | 3  | 19 | 5  | 2  | 4  | 11 | 1  | 20 | 5  | 5  | 13 | 20 | 19 | 5  | 13 | 4  | 7  | 8  | 20 | 19 | 9  | 10 | 6  | 5  | 20 | 5  | 3  | 6  | 7  | 5  | 16 | 12 |
| No SBA                         | 7  | 6  | 9  | 19 | 15 | 16 | 19 | 5  | 5  | 4  | 11 | 9  | 4  | 20 | 11 | 9  | 15 | 11 | 11 | 12 | 4  | 7  | 11 | 11 | 5  | 10 | 15 | 4  | 8  | 6  | 12 | 13 | 7  | 19 | 8  |
| Less than four ANC visits      | 3  | 14 | 15 | 6  | 18 | 20 | 6  | 10 | 14 | 15 | 4  | 7  | 7  | 17 | 12 | 7  | 13 | 20 | 5  | 6  | 7  | 17 | 17 | 1  | 20 | 18 | 11 | 7  | 2  | 8  | 20 | 20 | 4  | 20 | 15 |
| Unimproved sanitation          | 16 | 16 | 7  | 20 | 7  | 19 | 8  | 3  | 13 | 14 | 8  | 12 | 6  | 9  | 17 | 15 | 10 | 12 | 16 | 9  | 10 | 8  | 4  | 13 | 6  | 20 | 16 | 19 | 20 | 14 | 8  | 17 | 14 | 14 | 11 |
| Had diarrhea, but not used ORT | 8  | 5  | 17 | 14 | 20 | 10 | 13 | 19 | 19 | 2  | 9  | 6  | 13 | 16 | 4  | 3  | 9  | 17 | 7  | 10 | 19 | 3  | 18 | 19 | 17 | 19 | 19 | 18 | 6  | 4  | 7  | 14 | 15 | 7  | 20 |
| Unsafe stool disposal          | 10 | 10 | 8  | 11 | 10 | 8  | 20 | 7  | 8  | 5  | 14 | 8  | 19 | 7  | 16 | 11 | 14 | 16 | 8  | 19 | 6  | 11 | 7  | 5  | 8  | 3  | 17 | 15 | 9  | 9  | 13 | 5  | 8  | 15 | 13 |
| High indoor pollution          | 6  | 17 | 14 | 13 | 5  | 1  | 9  | 20 | 17 | 20 | 5  | 14 | 20 | 8  | 19 | 18 | 12 | 3  | 20 | 4  | 20 | 4  | 9  | 3  | 13 | 13 | 20 | 16 | 4  | 7  | 5  | 4  | 10 | 5  | 4  |
| Not fully vaccinated           | 19 | 9  | 5  | 15 | 6  | 18 | 15 | 2  | 6  | 6  | 10 | 15 | 16 | 10 | 10 | 17 | 16 | 9  | 15 | 15 | 13 | 9  | 16 | 12 | 12 | 5  | 14 | 8  | 15 | 19 | 15 | 6  | 18 | 10 | 6  |
| Infectious disease             | 15 | 18 | 12 | 8  | 9  | 17 | 7  | 14 | 7  | 13 | 18 | 10 | 14 | 3  | 18 | 20 | 6  | 18 | 19 | 8  | 12 | 10 | 8  | 6  | 9  | 4  | 18 | 17 | 10 | 12 | 16 | 9  | 19 | 12 | 9  |
| Child marriage                 | 11 | 13 | 11 | 16 | 12 | 9  | 12 | 9  | 9  | 16 | 12 | 13 | 8  | 12 | 13 | 12 | 18 | 14 | 13 | 14 | 11 | 18 | 14 | 14 | 11 | 8  | 8  | 11 | 16 | 17 | 19 | 10 | 16 | 6  | 10 |
| Delayed breastfeeding          | 12 | 12 | 10 | 18 | 16 | 12 | 11 | 11 | 15 | 17 | 17 | 11 | 9  | 4  | 14 | 10 | 7  | 6  | 17 | 18 | 18 | 14 | 12 | 16 | 14 | 9  | 10 | 12 | 17 | 18 | 17 | 12 | 13 | 13 | 17 |
| FP need unsatisfied            | 9  | 11 | 18 | 10 | 14 | 15 | 10 | 8  | 16 | 10 | 15 | 16 | 17 | 5  | 8  | 13 | 11 | 7  | 12 | 13 | 14 | 13 | 15 | 17 | 18 | 16 | 7  | 9  | 11 | 15 | 18 | 15 | 9  | 8  | 16 |
| No vit A supplement            | 17 | 20 | 6  | 9  | 11 | 7  | 17 | 13 | 10 | 9  | 16 | 17 | 18 | 14 | 15 | 14 | 8  | 15 | 9  | 20 | 16 | 5  | 13 | 7  | 7  | 17 | 12 | 10 | 19 | 20 | 9  | 11 | 17 | 17 | 7  |
| No iodized salt                | 20 | 19 | 20 | 7  | 8  | 14 | 18 | 12 | 12 | 8  | 13 | 18 | 15 | 15 | 2  | 8  | 20 | 19 | 14 | 16 | 15 | 19 | 20 | 15 | 16 | 15 | 6  | 5  | 13 | 16 | 10 | 18 | 11 | 18 | 19 |
| Unsafe water                   | 18 | 15 | 19 | 12 | 17 | 13 | 16 | 16 | 18 | 11 | 19 | 20 | 11 | 6  | 7  | 16 | 17 | 8  | 10 | 11 | 5  | 16 | 6  | 18 | 19 | 11 | 13 | 13 | 18 | 13 | 11 | 16 | 12 | 9  | 14 |
| No care seeking for susp pneu  | 14 | 8  | 13 | 17 | 13 | 6  | 14 | 15 | 20 | 12 | 7  | 19 | 12 | 19 | 5  | 5  | 19 | 10 | 18 | 17 | 17 | 12 | 10 | 20 | 15 | 12 | 9  | 14 | 14 | 10 | 14 | 19 | 20 | 11 | 18 |

**Label:** Rank 1<sup>st</sup> Rank 2<sup>nd</sup> Rank 3<sup>rd</sup>-4<sup>th</sup> Rank 5<sup>th</sup>-7<sup>th</sup> Rank 8<sup>th</sup>-12<sup>nd</sup> Rank 13<sup>th</sup>-20<sup>th</sup>

**C) Underweight, children 12-23 months old, total n=76,862**

|                                | BJ | BF | BI | CM | CI | CD | ET | GM | GH | GN | HT | IN | KE | KG | KM | LS | LR | MW | ML | MZ | MM | NA | NP | NE | PE | ST | SL | SZ | TD | TJ | TZ | TG | UG | ZM | ZW |   |    |
|--------------------------------|----|----|----|----|----|----|----|----|----|----|----|----|----|----|----|----|----|----|----|----|----|----|----|----|----|----|----|----|----|----|----|----|----|----|----|---|----|
| Short maternal stature         | 2  | 2  | 2  | 5  | 12 | 5  | 1  | 10 | 2  | 2  | 1  | 1  | 1  | 16 | 6  | 9  | 1  | 2  | 20 | 1  | 1  | 8  | 2  | 20 | 2  | 12 | 3  | 15 | 20 | 14 | 1  | 1  | 3  | 1  | 3  | 1 | 12 |
| Lack of maternal education     | 7  | 5  | 20 | 4  | 3  | 1  | 2  | 18 | 13 | 6  | 18 | 3  | 3  | 9  | 13 | 11 | 3  | 8  | 1  | 2  | 5  | 3  | 9  | 8  | 11 | 5  | 20 | 4  | 6  | 4  | 12 | 9  | 2  | 5  | 4  |   |    |
| Poorest HH wealth              | 20 | 19 | 3  | 19 | 16 | 18 | 3  | 16 | 3  | 4  | 3  | 4  | 2  | 7  | 2  | 8  | 6  | 9  | 5  | 14 | 18 | 9  | 8  | 17 | 13 | 3  | 1  | 1  | 10 | 15 | 4  | 2  | 4  | 6  | 5  |   |    |
| Low maternal BMI               | 1  | 1  | 1  | 2  | 1  | 2  | 7  | 4  | 1  | 3  | 2  | 2  | 7  | 4  | 1  | 12 | 2  | 1  | 2  | 3  | 2  | 12 | 5  | 1  | 1  | 1  | 12 | 12 | 1  | 2  | 3  | 4  | 1  | 2  | 1  |   |    |
| Poor dietary diversity         | 5  | 9  | 7  | 3  | 8  | 4  | 4  | 2  | 8  | 5  | 6  | 5  | 19 | 2  | 3  | 10 | 4  | 13 | 4  | 5  | 19 | 13 | 3  | 2  | 3  | 13 | 10 | 10 | 4  | 3  | 5  | 12 | 5  | 16 | 20 |   |    |
| No SBA                         | 6  | 4  | 5  | 7  | 15 | 7  | 11 | 8  | 6  | 11 | 19 | 7  | 9  | 15 | 18 | 6  | 12 | 4  | 9  | 15 | 6  | 14 | 12 | 10 | 7  | 8  | 7  | 16 | 7  | 10 | 17 | 5  | 13 | 9  | 6  |   |    |
| Less than four ANC visits      | 19 | 20 | 17 | 9  | 7  | 16 | 10 | 3  | 11 | 8  | 12 | 9  | 4  | 18 | 11 | 14 | 14 | 20 | 18 | 11 | 3  | 2  | 1  | 18 | 18 | 15 | 13 | 20 | 19 | 7  | 14 | 3  | 6  | 3  | 2  |   |    |
| Unimproved sanitation          | 14 | 6  | 12 | 12 | 10 | 11 | 6  | 6  | 16 | 18 | 8  | 6  | 17 | 1  | 7  | 19 | 10 | 14 | 11 | 20 | 17 | 20 | 7  | 9  | 5  | 17 | 8  | 17 | 17 | 8  | 16 | 19 | 18 | 8  | 9  |   |    |
| Had diarrhea, but not used ORT | 9  | 18 | 6  | 15 | 5  | 13 | 5  | 7  | 10 | 9  | 17 | 8  | 6  | 17 | 8  | 1  | 7  | 3  | 17 | 4  | 16 | 4  | 20 | 3  | 8  | 4  | 2  | 13 | 5  | 1  | 19 | 20 | 9  | 19 | 19 |   |    |
| Unsafe stool disposal          | 17 | 8  | 8  | 17 | 6  | 19 | 8  | 5  | 5  | 19 | 7  | 12 | 10 | 8  | 15 | 4  | 19 | 18 | 8  | 9  | 13 | 7  | 16 | 4  | 15 | 18 | 15 | 6  | 3  | 5  | 6  | 14 | 8  | 10 | 16 |   |    |
| High indoor pollution          | 3  | 3  | 19 | 1  | 2  | 14 | 12 | 20 | 12 | 1  | 13 | 10 | 5  | 3  | 14 | 17 | 16 | 10 | 19 | 8  | 4  | 11 | 4  | 13 | 16 | 20 | 16 | 19 | 8  | 16 | 2  | 6  | 12 | 4  | 18 |   |    |
| Not fully vaccinated           | 8  | 16 | 15 | 6  | 13 | 17 | 17 | 19 | 15 | 16 | 11 | 15 | 8  | 19 | 5  | 18 | 15 | 5  | 10 | 12 | 11 | 5  | 13 | 11 | 9  | 14 | 9  | 5  | 2  | 18 | 8  | 10 | 15 | 14 | 14 |   |    |
| Infectious disease             | 10 | 7  | 18 | 13 | 18 | 20 | 14 | 13 | 14 | 13 | 10 | 14 | 13 | 20 | 10 | 20 | 8  | 16 | 3  | 10 | 7  | 18 | 18 | 7  | 10 | 19 | 6  | 18 | 9  | 20 | 11 | 7  | 17 | 13 | 13 |   |    |
| Child marriage                 | 11 | 13 | 14 | 18 | 19 | 10 | 18 | 14 | 20 | 7  | 20 | 13 | 20 | 12 | 19 | 7  | 13 | 6  | 13 | 13 | 10 | 19 | 11 | 5  | 14 | 10 | 18 | 9  | 12 | 6  | 20 | 11 | 19 | 11 | 7  |   |    |
| Delayed breastfeeding          | 15 | 17 | 10 | 8  | 11 | 15 | 16 | 15 | 19 | 14 | 9  | 16 | 15 | 10 | 9  | 2  | 5  | 19 | 14 | 16 | 9  | 1  | 15 | 15 | 6  | 6  | 4  | 8  | 18 | 9  | 10 | 17 | 10 | 7  | 8  |   |    |
| FP need unsatisfied            | 4  | 10 | 16 | 14 | 17 | 12 | 15 | 12 | 17 | 20 | 4  | 19 | 18 | 11 | 4  | 16 | 9  | 15 | 15 | 18 | 15 | 16 | 14 | 12 | 17 | 7  | 17 | 3  | 16 | 19 | 9  | 8  | 16 | 20 | 10 |   |    |
| No vit A supplement            | 13 | 15 | 13 | 10 | 9  | 6  | 20 | 1  | 18 | 10 | 16 | 11 | 16 | 6  | 12 | 15 | 17 | 7  | 12 | 6  | 12 | 17 | 17 | 6  | 4  | 2  | 19 | 14 | 15 | 12 | 18 | 15 | 11 | 12 | 17 |   |    |
| No iodized salt                | 16 | 12 | 4  | 20 | 20 | 3  | 9  | 17 | 9  | 12 | 5  | 18 | 14 | 5  | 16 | 3  | 18 | 17 | 7  | 19 | 14 | 6  | 6  | 19 | 20 | 16 | 11 | 2  | 13 | 11 | 7  | 13 | 14 | 18 | 3  |   |    |
| Unsafe water                   | 12 | 11 | 9  | 11 | 14 | 8  | 19 | 9  | 7  | 15 | 15 | 17 | 11 | 13 | 17 | 13 | 20 | 12 | 16 | 7  | 8  | 15 | 10 | 14 | 19 | 9  | 5  | 11 | 14 | 17 | 15 | 16 | 7  | 17 | 15 |   |    |
| No care seeking for susp pneu  | 18 | 14 | 11 | 16 | 4  | 9  | 13 | 11 | 4  | 17 | 14 | 20 | 12 | 14 | 20 | 5  | 11 | 11 | 6  | 17 | 20 | 10 | 19 | 16 | 12 | 11 | 14 | 7  | 11 | 13 | 13 | 18 | 20 | 15 | 11 |   |    |

**Label:** Rank 1<sup>st</sup> Rank 2<sup>nd</sup> Rank 3<sup>rd</sup>-4<sup>th</sup> Rank 5<sup>th</sup>-7<sup>th</sup> Rank 8<sup>th</sup>-12<sup>nd</sup> Rank 13<sup>th</sup>-20<sup>th</sup>

**D) Underweight, children 24-59 months old, total n=222,491**

|                                | BJ | BF | BI | CM | CI | CD | ET | GM | GH | GN | HT | IN | KE | KG | KM | LS | LR | MW | ML | MZ | MM | NA | NP | NE | PE | ST | SL | SZ | TD | TJ | TZ | TG | UG | ZM | ZW |
|--------------------------------|----|----|----|----|----|----|----|----|----|----|----|----|----|----|----|----|----|----|----|----|----|----|----|----|----|----|----|----|----|----|----|----|----|----|----|
| Short maternal stature         | 2  | 1  | 2  | 3  | 4  | 1  | 2  | 2  | 3  | 11 | 1  | 1  | 2  | 12 | 4  | 2  | 2  | 1  | 1  | 2  | 1  | 14 | 2  | 2  | 1  | 2  | 1  | 1  | 8  | 2  | 1  | 3  | 2  | 1  | 2  |
| Lack of maternal education     | 1  | 3  | 5  | 6  | 2  | 19 | 4  | 12 | 1  | 7  | 4  | 3  | 4  | 13 | 1  | 4  | 17 | 17 | 2  | 4  | 19 | 15 | 8  | 4  | 5  | 18 | 3  | 3  | 3  | 20 | 6  | 6  | 1  | 6  | 3  |
| Poorest HH wealth              | 4  | 4  | 3  | 2  | 6  | 2  | 6  | 5  | 19 | 12 | 15 | 4  | 3  | 17 | 9  | 3  | 3  | 3  | 7  | 3  | 12 | 3  | 6  | 7  | 2  | 1  | 18 | 2  | 7  | 6  | 4  | 19 | 4  | 3  | 19 |
| Low maternal BMI               | 3  | 2  | 1  | 1  | 1  | 3  | 3  | 3  | 2  | 1  | 3  | 2  | 1  | 1  | 2  | 1  | 1  | 2  | 3  | 1  | 2  | 7  | 1  | 1  | 4  | 3  | 2  | 4  | 1  | 1  | 2  | 2  | 3  | 2  | 1  |
| Poor dietary diversity         | 13 | 15 | 16 | 4  | 14 | 9  | 5  | 19 | 12 | 2  | 19 | 5  | 18 | 14 | 20 | 19 | 14 | 4  | 8  | 5  | 3  | 11 | 18 | 15 | 20 | 14 | 16 | 18 | 9  | 12 | 12 | 9  | 5  | 18 | 20 |
| No SBA                         | 5  | 8  | 7  | 10 | 15 | 10 | 16 | 6  | 5  | 3  | 11 | 9  | 6  | 11 | 8  | 6  | 9  | 11 | 10 | 20 | 5  | 6  | 12 | 17 | 18 | 12 | 17 | 5  | 5  | 9  | 18 | 12 | 7  | 8  | 12 |
| Less than four ANC visits      | 6  | 7  | 18 | 5  | 20 | 20 | 1  | 4  | 13 | 19 | 8  | 8  | 13 | 15 | 15 | 16 | 16 | 15 | 6  | 18 | 6  | 19 | 20 | 11 | 13 | 13 | 5  | 20 | 2  | 3  | 20 | 17 | 18 | 4  | 15 |
| Unimproved sanitation          | 18 | 12 | 15 | 18 | 9  | 14 | 10 | 13 | 7  | 15 | 10 | 10 | 10 | 3  | 19 | 13 | 7  | 19 | 12 | 10 | 9  | 16 | 3  | 14 | 7  | 15 | 6  | 9  | 10 | 10 | 17 | 14 | 19 | 10 | 7  |
| Had diarrhea, but not used ORT | 8  | 5  | 9  | 7  | 19 | 7  | 7  | 7  | 17 | 4  | 6  | 6  | 9  | 10 | 6  | 7  | 5  | 20 | 4  | 8  | 20 | 2  | 10 | 19 | 8  | 10 | 13 | 8  | 4  | 4  | 5  | 4  | 15 | 16 | 18 |
| Unsafe stool disposal          | 15 | 11 | 11 | 9  | 13 | 5  | 12 | 17 | 9  | 10 | 16 | 7  | 12 | 5  | 5  | 5  | 6  | 5  | 9  | 12 | 4  | 5  | 14 | 5  | 11 | 4  | 19 | 12 | 12 | 18 | 8  | 7  | 6  | 19 | 11 |
| High indoor pollution          | 14 | 6  | 20 | 20 | 8  | 15 | 20 | 1  | 6  | 6  | 2  | 14 | 5  | 4  | 16 | 14 | 19 | 14 | 5  | 7  | 15 | 1  | 7  | 6  | 12 | 19 | 15 | 19 | 11 | 13 | 3  | 1  | 13 | 9  | 4  |
| Not fully vaccinated           | 17 | 9  | 4  | 11 | 11 | 16 | 8  | 11 | 8  | 14 | 12 | 13 | 16 | 9  | 3  | 15 | 11 | 10 | 13 | 14 | 13 | 12 | 19 | 16 | 19 | 5  | 8  | 7  | 6  | 17 | 9  | 5  | 12 | 7  | 16 |
| Infectious disease             | 7  | 13 | 19 | 14 | 5  | 8  | 19 | 20 | 4  | 17 | 20 | 11 | 11 | 2  | 18 | 12 | 8  | 8  | 20 | 9  | 7  | 20 | 4  | 3  | 9  | 17 | 20 | 6  | 16 | 8  | 11 | 15 | 20 | 5  | 6  |
| Child marriage                 | 16 | 16 | 13 | 15 | 12 | 11 | 14 | 15 | 18 | 18 | 14 | 15 | 19 | 16 | 13 | 11 | 13 | 12 | 16 | 15 | 8  | 18 | 16 | 12 | 15 | 7  | 12 | 13 | 19 | 15 | 16 | 8  | 11 | 13 | 9  |
| Delayed breastfeeding          | 12 | 18 | 12 | 19 | 18 | 17 | 15 | 16 | 15 | 20 | 13 | 17 | 17 | 8  | 12 | 8  | 10 | 6  | 14 | 17 | 17 | 9  | 13 | 10 | 17 | 9  | 14 | 14 | 15 | 14 | 19 | 16 | 10 | 12 | 13 |
| FP need unsatisfied            | 10 | 10 | 14 | 13 | 7  | 18 | 11 | 14 | 14 | 8  | 17 | 16 | 7  | 7  | 10 | 10 | 4  | 13 | 15 | 11 | 16 | 10 | 17 | 13 | 14 | 20 | 9  | 15 | 14 | 7  | 7  | 10 | 14 | 11 | 5  |
| No vit A supplement            | 9  | 19 | 10 | 12 | 10 | 12 | 18 | 9  | 11 | 5  | 7  | 12 | 15 | 6  | 14 | 18 | 12 | 18 | 18 | 19 | 11 | 8  | 5  | 8  | 6  | 6  | 10 | 16 | 18 | 19 | 13 | 13 | 9  | 20 | 17 |
| No iodized salt                | 20 | 17 | 6  | 8  | 3  | 4  | 9  | 18 | 10 | 9  | 9  | 19 | 20 | 18 | 17 | 9  | 20 | 7  | 19 | 16 | 18 | 17 | 15 | 9  | 3  | 8  | 11 | 11 | 17 | 5  | 10 | 18 | 8  | 17 | 8  |
| Unsafe water                   | 19 | 14 | 17 | 16 | 17 | 13 | 17 | 10 | 16 | 16 | 18 | 18 | 8  | 19 | 7  | 17 | 15 | 9  | 17 | 13 | 10 | 13 | 9  | 18 | 10 | 11 | 7  | 10 | 20 | 16 | 14 | 11 | 17 | 14 | 10 |
| No care seeking for susp pneu  | 11 | 20 | 8  | 17 | 16 | 6  | 13 | 8  | 20 | 13 | 5  | 20 | 14 | 20 | 11 | 20 | 18 | 16 | 11 | 6  | 14 | 4  | 11 | 20 | 16 | 16 | 4  | 17 | 13 | 11 | 15 | 20 | 16 | 15 | 14 |

**Label:** Rank 1<sup>st</sup> Rank 2<sup>nd</sup> Rank 3<sup>rd</sup>-4<sup>th</sup> Rank 5<sup>th</sup>-7<sup>th</sup> Rank 8<sup>th</sup>-12<sup>nd</sup> Rank 13<sup>th</sup>-20<sup>th</sup>

**E) Wasting, children 12-23 months old, total n=76,862**

|                                | BJ | BF | BI | CM | CI | CD | ET | GM | GH | GN | HT | IN | KE | KG | KM | LS | LR | MW | ML | MZ | MM | NA | NP | NE | PE | ST | SL | SZ | TD | TJ | TZ | TG | UG | ZM | ZW |
|--------------------------------|----|----|----|----|----|----|----|----|----|----|----|----|----|----|----|----|----|----|----|----|----|----|----|----|----|----|----|----|----|----|----|----|----|----|----|
| Short maternal stature         | 15 | 4  | 18 | 6  | 9  | 2  | 4  | 12 | 11 | 9  | 14 | 2  | 15 | 9  | 2  | 2  | 12 | 1  | 12 | 1  | 9  | 8  | 18 | 3  | 9  | 11 | 19 | 4  | 8  | 14 | 9  | 1  | 3  | 8  | 2  |
| Lack of maternal education     | 17 | 3  | 20 | 4  | 1  | 9  | 20 | 11 | 12 | 6  | 13 | 6  | 3  | 2  | 18 | 12 | 18 | 12 | 1  | 5  | 20 | 1  | 5  | 19 | 14 | 4  | 17 | 6  | 11 | 7  | 3  | 6  | 4  | 13 | 10 |
| Poorest HH wealth              | 20 | 16 | 7  | 18 | 5  | 19 | 3  | 3  | 3  | 5  | 12 | 3  | 5  | 17 | 6  | 15 | 20 | 14 | 14 | 2  | 1  | 10 | 19 | 1  | 18 | 18 | 18 | 11 | 16 | 11 | 15 | 3  | 1  | 1  | 1  |
| Low maternal BMI               | 1  | 2  | 11 | 2  | 2  | 1  | 7  | 6  | 5  | 3  | 3  | 1  | 10 | 14 | 5  | 9  | 11 | 7  | 4  | 7  | 3  | 4  | 9  | 2  | 1  | 3  | 1  | 12 | 1  | 2  | 7  | 2  | 9  | 6  | 5  |
| Poor dietary diversity         | 5  | 1  | 13 | 3  | 7  | 11 | 5  | 2  | 18 | 1  | 19 | 4  | 4  | 19 | 1  | 11 | 16 | 6  | 5  | 8  | 7  | 14 | 2  | 17 | 4  | 1  | 4  | 2  | 6  | 12 | 1  | 18 | 16 | 10 | 4  |
| No SBA                         | 7  | 5  | 1  | 1  | 15 | 7  | 9  | 18 | 13 | 14 | 7  | 9  | 6  | 8  | 15 | 18 | 5  | 4  | 9  | 19 | 4  | 6  | 13 | 16 | 6  | 14 | 12 | 8  | 19 | 9  | 14 | 4  | 13 | 3  | 15 |
| Less than four ANC visits      | 19 | 20 | 12 | 20 | 20 | 10 | 2  | 1  | 4  | 18 | 5  | 13 | 1  | 15 | 17 | 16 | 6  | 20 | 20 | 20 | 8  | 2  | 4  | 20 | 11 | 2  | 16 | 14 | 13 | 1  | 13 | 20 | 6  | 17 | 3  |
| Unimproved sanitation          | 11 | 15 | 5  | 5  | 11 | 16 | 19 | 9  | 8  | 12 | 16 | 5  | 16 | 1  | 7  | 5  | 15 | 19 | 6  | 18 | 13 | 20 | 14 | 12 | 7  | 9  | 2  | 20 | 7  | 16 | 20 | 9  | 17 | 11 | 6  |
| Had diarrhea, but not used ORT | 8  | 10 | 3  | 11 | 12 | 4  | 11 | 17 | 1  | 13 | 18 | 8  | 2  | 11 | 9  | 1  | 1  | 2  | 16 | 11 | 19 | 12 | 3  | 4  | 17 | 5  | 3  | 13 | 20 | 4  | 19 | 12 | 18 | 2  | 9  |
| Unsafe stool disposal          | 18 | 6  | 9  | 15 | 10 | 20 | 10 | 7  | 16 | 17 | 10 | 15 | 12 | 16 | 10 | 3  | 14 | 18 | 8  | 12 | 12 | 16 | 6  | 8  | 12 | 16 | 5  | 9  | 4  | 8  | 6  | 17 | 20 | 18 | 13 |
| High indoor pollution          | 2  | 18 | 19 | 7  | 3  | 13 | 1  | 20 | 20 | 2  | 15 | 16 | 11 | 18 | 8  | 4  | 10 | 16 | 2  | 3  | 17 | 5  | 11 | 9  | 2  | 13 | 13 | 19 | 2  | 20 | 11 | 19 | 10 | 20 | 18 |
| Not fully vaccinated           | 6  | 12 | 14 | 8  | 19 | 8  | 18 | 10 | 9  | 11 | 6  | 10 | 7  | 3  | 4  | 10 | 7  | 9  | 15 | 10 | 2  | 11 | 15 | 10 | 5  | 19 | 6  | 16 | 5  | 10 | 5  | 11 | 12 | 9  | 17 |
| Infectious disease             | 9  | 7  | 16 | 13 | 4  | 5  | 6  | 8  | 19 | 4  | 20 | 11 | 18 | 20 | 11 | 13 | 19 | 15 | 3  | 6  | 5  | 18 | 10 | 5  | 3  | 20 | 10 | 1  | 3  | 19 | 2  | 8  | 5  | 19 | 16 |
| Child marriage                 | 12 | 17 | 10 | 14 | 8  | 12 | 8  | 14 | 6  | 7  | 17 | 17 | 19 | 12 | 20 | 20 | 17 | 13 | 11 | 16 | 11 | 13 | 17 | 7  | 10 | 10 | 7  | 15 | 14 | 6  | 17 | 5  | 15 | 7  | 7  |
| Delayed breastfeeding          | 10 | 8  | 8  | 9  | 18 | 15 | 15 | 16 | 17 | 20 | 4  | 14 | 13 | 6  | 19 | 14 | 4  | 17 | 13 | 15 | 14 | 9  | 16 | 15 | 13 | 8  | 9  | 5  | 9  | 5  | 4  | 16 | 11 | 4  | 12 |
| FP need unsatisfied            | 16 | 11 | 17 | 12 | 6  | 17 | 14 | 15 | 14 | 19 | 8  | 19 | 17 | 7  | 3  | 7  | 13 | 5  | 18 | 17 | 16 | 17 | 7  | 13 | 16 | 15 | 15 | 7  | 15 | 17 | 10 | 10 | 8  | 12 | 20 |
| No vit A supplement            | 4  | 9  | 15 | 17 | 16 | 3  | 17 | 4  | 2  | 16 | 9  | 12 | 9  | 4  | 14 | 8  | 8  | 8  | 17 | 4  | 18 | 15 | 20 | 6  | 19 | 7  | 20 | 3  | 18 | 13 | 8  | 13 | 14 | 16 | 19 |
| No iodized salt                | 3  | 19 | 2  | 19 | 17 | 6  | 16 | 19 | 15 | 10 | 1  | 18 | 20 | 13 | 13 | 17 | 2  | 3  | 10 | 13 | 10 | 7  | 1  | 18 | 20 | 6  | 14 | 17 | 10 | 3  | 18 | 7  | 19 | 5  | 11 |
| Unsafe water                   | 14 | 13 | 4  | 16 | 14 | 14 | 12 | 13 | 10 | 15 | 11 | 7  | 8  | 5  | 12 | 19 | 9  | 10 | 19 | 14 | 6  | 19 | 12 | 11 | 8  | 17 | 11 | 18 | 17 | 18 | 16 | 14 | 2  | 15 | 8  |
| No care seeking for susp pneu  | 13 | 14 | 6  | 10 | 13 | 18 | 13 | 5  | 7  | 8  | 2  | 20 | 14 | 10 | 16 | 6  | 3  | 11 | 7  | 9  | 15 | 3  | 8  | 14 | 15 | 12 | 8  | 10 | 12 | 15 | 12 | 15 | 7  | 14 | 14 |

**Label:** Rank 1<sup>st</sup> Rank 2<sup>nd</sup> Rank 3<sup>rd</sup>-4<sup>th</sup> Rank 5<sup>th</sup>-7<sup>th</sup> Rank 8<sup>th</sup>-12<sup>nd</sup> Rank 13<sup>th</sup>-20<sup>th</sup>



**F) Wasting, children 24-59 months old, total n=222,491**

|                                | BJ | BF | BI | CM | CI | CD | ET | GM | GH | GN | HT | IN | KE | KG | KM | LS | LR | MW | ML | MZ | MM | NA | NP | NE | PE | ST | SL | SZ | TD | TJ | TZ | TG | UG | ZM | ZW |
|--------------------------------|----|----|----|----|----|----|----|----|----|----|----|----|----|----|----|----|----|----|----|----|----|----|----|----|----|----|----|----|----|----|----|----|----|----|----|
| Short maternal stature         | 2  | 3  | 17 | 13 | 11 | 4  | 13 | 5  | 10 | 6  | 5  | 5  | 12 | 9  | 15 | 11 | 20 | 1  | 20 | 6  | 16 | 12 | 20 | 1  | 2  | 18 | 20 | 5  | 1  | 8  | 2  | 11 | 5  | 1  | 1  |
| Lack of maternal education     | 16 | 9  | 19 | 18 | 1  | 7  | 3  | 9  | 17 | 12 | 7  | 2  | 1  | 19 | 1  | 10 | 2  | 20 | 3  | 5  | 19 | 1  | 6  | 19 | 12 | 9  | 4  | 6  | 6  | 7  | 15 | 2  | 19 | 20 | 8  |
| Poorest HH wealth              | 19 | 7  | 2  | 1  | 18 | 1  | 8  | 19 | 20 | 20 | 3  | 6  | 2  | 5  | 2  | 17 | 1  | 17 | 5  | 3  | 12 | 4  | 18 | 7  | 15 | 17 | 18 | 18 | 16 | 20 | 18 | 3  | 2  | 13 | 20 |
| Low maternal BMI               | 1  | 2  | 1  | 10 | 2  | 11 | 1  | 2  | 1  | 7  | 1  | 1  | 4  | 1  | 12 | 2  | 4  | 3  | 1  | 2  | 2  | 20 | 3  | 3  | 1  | 13 | 7  | 9  | 2  | 1  | 1  | 1  | 3  | 12 | 3  |
| Poor dietary diversity         | 18 | 16 | 20 | 4  | 17 | 5  | 18 | 11 | 4  | 2  | 20 | 4  | 20 | 4  | 7  | 7  | 6  | 15 | 19 | 4  | 1  | 19 | 7  | 17 | 20 | 19 | 1  | 8  | 14 | 16 | 6  | 10 | 15 | 8  | 5  |
| No SBA                         | 8  | 14 | 15 | 6  | 16 | 2  | 7  | 8  | 6  | 3  | 12 | 16 | 8  | 8  | 17 | 5  | 7  | 7  | 11 | 18 | 7  | 5  | 12 | 16 | 14 | 11 | 10 | 20 | 7  | 18 | 5  | 16 | 7  | 3  | 15 |
| Less than four ANC visits      | 20 | 20 | 18 | 20 | 20 | 20 | 4  | 1  | 2  | 1  | 13 | 20 | 5  | 18 | 16 | 12 | 18 | 11 | 2  | 1  | 6  | 15 | 19 | 11 | 19 | 3  | 2  | 10 | 3  | 3  | 19 | 4  | 20 | 19 | 11 |
| Unimproved sanitation          | 14 | 11 | 16 | 14 | 13 | 17 | 16 | 16 | 5  | 9  | 4  | 7  | 18 | 10 | 5  | 8  | 9  | 10 | 9  | 12 | 11 | 2  | 2  | 8  | 9  | 4  | 11 | 4  | 4  | 9  | 11 | 19 | 8  | 6  | 10 |
| Had diarrhea, but not used ORT | 5  | 4  | 5  | 5  | 19 | 19 | 2  | 18 | 9  | 4  | 6  | 17 | 6  | 11 | 4  | 9  | 15 | 18 | 7  | 20 | 13 | 13 | 13 | 18 | 5  | 20 | 17 | 12 | 5  | 2  | 20 | 20 | 11 | 18 | 7  |
| Unsafe stool disposal          | 17 | 1  | 14 | 17 | 4  | 6  | 6  | 10 | 16 | 11 | 17 | 10 | 3  | 13 | 3  | 19 | 12 | 6  | 12 | 9  | 4  | 8  | 8  | 4  | 10 | 8  | 13 | 19 | 8  | 11 | 10 | 13 | 4  | 16 | 9  |
| High indoor pollution          | 4  | 19 | 13 | 19 | 8  | 8  | 5  | 4  | 11 | 14 | 15 | 9  | 10 | 6  | 19 | 1  | 11 | 9  | 4  | 19 | 10 | 9  | 4  | 2  | 6  | 16 | 14 | 7  | 12 | 4  | 7  | 9  | 18 | 7  | 2  |
| Not fully vaccinated           | 7  | 17 | 4  | 8  | 12 | 13 | 10 | 17 | 19 | 18 | 10 | 12 | 9  | 7  | 8  | 4  | 13 | 12 | 10 | 8  | 18 | 11 | 16 | 10 | 4  | 5  | 16 | 17 | 11 | 17 | 4  | 6  | 17 | 15 | 18 |
| Infectious disease             | 10 | 13 | 9  | 11 | 3  | 3  | 20 | 20 | 18 | 19 | 8  | 14 | 17 | 20 | 18 | 6  | 17 | 4  | 15 | 10 | 14 | 17 | 5  | 20 | 18 | 10 | 12 | 3  | 19 | 13 | 3  | 15 | 13 | 4  | 4  |
| Child marriage                 | 9  | 10 | 3  | 16 | 9  | 16 | 15 | 14 | 7  | 16 | 18 | 15 | 15 | 3  | 11 | 14 | 10 | 5  | 17 | 14 | 9  | 3  | 15 | 15 | 13 | 7  | 8  | 15 | 10 | 14 | 16 | 12 | 9  | 10 | 12 |
| Delayed breastfeeding          | 15 | 15 | 12 | 2  | 15 | 9  | 14 | 12 | 15 | 17 | 9  | 18 | 16 | 16 | 13 | 13 | 14 | 13 | 6  | 11 | 5  | 7  | 10 | 14 | 7  | 6  | 15 | 1  | 9  | 5  | 14 | 5  | 10 | 17 | 17 |
| FP need unsatisfied            | 13 | 8  | 11 | 7  | 14 | 15 | 19 | 15 | 8  | 15 | 11 | 13 | 13 | 14 | 10 | 20 | 5  | 14 | 13 | 16 | 17 | 18 | 17 | 9  | 8  | 15 | 5  | 2  | 18 | 12 | 12 | 17 | 16 | 9  | 19 |
| No vit A supplement            | 12 | 6  | 10 | 9  | 7  | 12 | 17 | 7  | 14 | 5  | 2  | 8  | 7  | 2  | 9  | 15 | 8  | 19 | 16 | 7  | 20 | 14 | 1  | 5  | 17 | 2  | 9  | 16 | 15 | 19 | 17 | 7  | 12 | 5  | 16 |
| No iodized salt                | 11 | 18 | 6  | 3  | 6  | 18 | 9  | 13 | 12 | 8  | 19 | 11 | 19 | 15 | 20 | 18 | 19 | 2  | 14 | 13 | 15 | 16 | 11 | 13 | 16 | 1  | 19 | 11 | 20 | 15 | 9  | 18 | 1  | 2  | 14 |
| Unsafe water                   | 6  | 12 | 8  | 15 | 5  | 14 | 11 | 6  | 13 | 13 | 14 | 3  | 14 | 17 | 14 | 3  | 16 | 8  | 18 | 17 | 8  | 10 | 14 | 12 | 3  | 14 | 6  | 13 | 17 | 6  | 8  | 8  | 14 | 11 | 13 |
| No care seeking for susp pneu  | 3  | 5  | 7  | 12 | 10 | 10 | 12 | 3  | 3  | 10 | 16 | 19 | 11 | 12 | 6  | 16 | 3  | 16 | 8  | 15 | 3  | 6  | 9  | 6  | 11 | 12 | 3  | 14 | 13 | 10 | 13 | 14 | 6  | 14 | 6  |

**Label:** Rank 1<sup>st</sup> Rank 2<sup>nd</sup> Rank 3<sup>rd</sup>-4<sup>th</sup> Rank 5<sup>th</sup>-7<sup>th</sup> Rank 8<sup>th</sup>-12<sup>nd</sup> Rank 13<sup>th</sup>-20<sup>th</sup>

**eFigure 12. Country-Specific Odds Ratios for 20 Factors Associated With Child Anthropometric Failures From Fully Adjusted Models, Stratified by Children's Age**  
**A) stunting among children 12-23 months old, B) stunting among children 24-59 months old, C) underweight among children 12-23 months old, D) underweight among children 24-59 months old, E) wasting among children 12-23 months old, and F) wasting among children 24-59 months old**

**A) Stunting, children 12-23 months old, total n=76,862**

|                                | BJ   | BF  | BI   | CM   | CI  | CD  | ET  | GM  | GH   | GN  | HT  | IN  | KE  | KG  | KM  | LS   | LR  | MW   | ML  | MZ  | MM  | NA    | NP   | NE  | PE   | ST   | SL  | SZ   | TD  | TJ  | TZ  | TG  | UG   | ZM  | ZW   |
|--------------------------------|------|-----|------|------|-----|-----|-----|-----|------|-----|-----|-----|-----|-----|-----|------|-----|------|-----|-----|-----|-------|------|-----|------|------|-----|------|-----|-----|-----|-----|------|-----|------|
| Short maternal stature         | 11.1 | 1.5 | 33.0 | 1.0  | 2.3 | 3.5 | 4.0 | 6.1 | 11.8 | 1.2 | 3.8 | 4.0 | 3.2 | 1.6 | 0.9 | 3.6  | 5.2 | 13.0 | 1.0 | 5.0 | 2.6 | 1.0   | 17.8 | 2.6 | 10.0 | 12.7 | 1.5 | 3.8  | 3.5 | 1.9 | 4.8 | 1.0 | 3.4  | 3.1 | 20.1 |
| Lack of maternal education     | 2.6  | 3.4 | 0.8  | 12.2 | 1.5 | 3.6 | 3.6 | 0.4 | 0.8  | 1.5 | 1.5 | 1.9 | 1.6 | 0.8 | 2.1 | 2.1  | 0.7 | 3.7  | 3.4 | 9.1 | 1.3 | 0.0   | 1.4  | 1.9 | 2.9  | 1.4  | 0.9 | 2.8  | 0.9 | 2.8 | 0.7 | 0.5 | 21.3 | 1.3 | 52.5 |
| Poorest HH wealth              | 1.2  | 1.1 | 3.7  | 2.7  | 0.6 | 1.8 | 2.0 | 0.7 | 2.1  | 1.8 | 7.8 | 1.2 | 1.9 | 1.1 | 3.2 | 31.1 | 6.1 | 1.2  | 5.5 | 1.4 | 0.3 | 168.8 | 6.6  | 0.6 | 5.4  | 6.7  | 1.1 | 9.2  | 0.7 | 0.7 | 2.1 | 1.4 | 0.8  | 1.0 | 3.6  |
| Low maternal BMI               | 1.3  | 1.7 | 2.0  | 1.8  | 3.3 | 1.6 | 1.9 | 2.6 | 0.2  | 1.5 | 1.4 | 1.4 | 1.0 | 5.3 | 3.4 | 21.2 | 0.8 | 7.1  | 2.1 | 0.9 | 2.3 | 2.5   | 0.5  | 3.3 | 1.6  | 2.8  | 0.8 | 1.0  | 1.1 | 1.4 | 1.7 | 3.5 | 1.4  | 2.1 | 2.7  |
| Poor dietary diversity         | 0.9  | 1.7 | 1.4  | 1.1  | 0.6 | 0.8 | 1.6 | 1.1 | 0.8  | 1.1 | 2.2 | 1.0 | 0.7 | 2.0 | 0.7 | 2.6  | 0.6 | 0.8  | 1.5 | 1.1 | 0.5 | 1.1   | 1.7  | 2.2 | 1.5  | 10.1 | 0.5 | 0.3  | 1.3 | 1.6 | 2.4 | 1.3 | 0.6  | 1.1 | 0.4  |
| No SBA                         | 1.2  | 1.2 | 1.6  | 1.3  | 0.6 | 1.1 | 1.3 | 0.9 | 2.0  | 0.9 | 1.2 | 1.1 | 1.2 | 1.0 | 0.6 | 1.9  | 1.0 | 1.4  | 1.1 | 1.4 | 1.6 | 0.3   | 1.0  | 0.8 | 1.8  | 0.9  | 1.3 | 0.9  | 1.2 | 0.7 | 0.9 | 1.2 | 0.9  | 2.1 | 1.1  |
| Less than four ANC visits      | 4.1  | 0.4 | 0.0  | 1.8  | 3.3 | 1.9 | 0.4 | 1.6 | 3.5  | 8.3 | 0.8 | 1.2 | 1.2 | 0.4 | 1.3 | 4.0  | 1.1 | 0.2  | 0.8 | 1.3 | 1.8 | 81.1  | 1.3  | 1.2 | 1.4  | 0.5  | 1.1 | 0.3  | 0.2 | 1.3 | 2.0 | 6.5 | 5.0  | 1.2 | 2.5  |
| Unimproved sanitation          | 1.1  | 1.2 | 0.9  | 0.8  | 0.8 | 1.0 | 1.7 | 1.6 | 0.5  | 1.4 | 1.2 | 1.2 | 1.1 | 1.1 | 1.3 | 0.4  | 1.0 | 1.0  | 0.7 | 1.1 | 0.7 | 0.8   | 1.1  | 0.8 | 0.8  | 0.9  | 1.3 | 0.8  | 1.1 | 1.3 | 1.0 | 0.8 | 1.2  | 1.2 | 1.3  |
| Had diarrhea, but not used ORT | 1.2  | 0.5 | 1.1  | 1.1  | 2.0 | 0.8 | 1.1 | 1.0 | 0.5  | 0.6 | 0.9 | 1.0 | 1.2 | 1.0 | 1.5 | 7.5  | 0.8 | 2.5  | 0.8 | 1.2 | 1.0 | 14.9  | 0.6  | 0.9 | 1.2  | 3.5  | 0.3 | 1.0  | 1.3 | 2.5 | 1.6 | 0.6 | 0.9  | 0.8 | 0.6  |
| Unsafe stool disposal          | 1.0  | 1.2 | 1.6  | 1.3  | 1.5 | 0.9 | 0.8 | 1.3 | 1.3  | 0.8 | 1.2 | 1.0 | 1.0 | 0.7 | 0.9 | 0.5  | 1.0 | 1.3  | 1.1 | 0.9 | 0.8 | 57.3  | 1.7  | 1.2 | 0.7  | 1.0  | 1.2 | 0.8  | 1.1 | 2.1 | 1.0 | 1.2 | 1.4  | 1.1 | 0.9  |
| High indoor pollution          | 1.7  | 0.8 | 1.0  | 2.2  | 1.9 | 0.7 | 0.4 | 0.6 | 1.5  | 0.6 | 0.7 | 1.1 | 1.2 | 1.2 | 0.6 | 0.4  | 1.0 | 0.4  | 1.2 | 2.7 | 1.7 | 0.4   | 0.8  | 0.6 | 0.8  | 0.5  | 1.0 | 0.2  | 1.2 | 0.7 | 1.1 | 1.0 | 0.2  | 1.8 | 1.0  |
| Not fully vaccinated           | 1.1  | 1.0 | 0.9  | 1.1  | 0.7 | 0.9 | 0.9 | 0.8 | 1.2  | 0.8 | 1.0 | 1.0 | 1.1 | 1.0 | 2.1 | 0.9  | 1.3 | 0.9  | 0.9 | 0.9 | 0.9 | 11.8  | 0.8  | 1.0 | 0.9  | 3.6  | 1.2 | 2.1  | 1.1 | 0.8 | 1.0 | 1.3 | 0.8  | 0.9 | 0.9  |
| Infectious disease             | 1.2  | 1.7 | 1.1  | 1.0  | 0.5 | 1.1 | 1.1 | 1.1 | 0.7  | 1.4 | 1.0 | 1.0 | 1.0 | 0.2 | 1.3 | 0.6  | 0.7 | 0.7  | 1.4 | 1.1 | 0.8 | 3.5   | 1.3  | 1.2 | 0.6  | 1.5  | 1.6 | 0.6  | 0.7 | 0.3 | 0.8 | 0.7 | 1.1  | 1.1 | 1.8  |
| Child marriage                 | 1.1  | 0.9 | 1.1  | 0.6  | 1.1 | 1.1 | 0.6 | 0.7 | 0.8  | 0.8 | 0.4 | 1.1 | 1.0 | 0.8 | 1.1 | 0.8  | 1.1 | 0.8  | 0.8 | 1.0 | 1.3 | 0.3   | 0.9  | 1.2 | 0.9  | 1.3  | 0.7 | 1.6  | 1.0 | 0.7 | 0.7 | 0.9 | 0.8  | 1.0 | 1.0  |
| Delayed breastfeeding          | 1.0  | 0.8 | 1.0  | 0.9  | 1.0 | 1.4 | 1.2 | 1.0 | 1.0  | 1.0 | 1.7 | 1.0 | 1.1 | 1.1 | 1.0 | 1.5  | 1.2 | 1.1  | 1.0 | 1.1 | 1.6 | 0.9   | 0.7  | 1.1 | 0.8  | 0.8  | 1.8 | 1.0  | 0.8 | 1.1 | 0.9 | 1.0 | 1.2  | 1.1 | 1.1  |
| FP need unsatisfied            | 1.2  | 1.1 | 1.1  | 0.9  | 0.9 | 0.8 | 1.2 | 1.3 | 0.7  | 0.9 | 1.5 | 1.0 | 0.9 | 1.3 | 1.3 | 0.2  | 1.1 | 1.0  | 1.0 | 0.9 | 1.0 | 0.5   | 1.6  | 1.1 | 1.5  | 0.6  | 1.1 | 0.8  | 1.0 | 1.0 | 1.0 | 1.6 | 0.8  | 0.8 | 1.0  |
| No vit A supplement            | 0.8  | 1.0 | 1.0  | 1.0  | 1.9 | 1.5 | 0.7 | 3.7 | 1.0  | 1.2 | 0.8 | 1.0 | 0.8 | 0.8 | 1.3 | 0.3  | 1.0 | 1.1  | 1.0 | 0.9 | 2.0 | 0.1   | 1.2  | 1.5 | 1.5  | 6.4  | 1.6 | 16.2 | 1.1 | 0.7 | 0.7 | 1.4 | 0.9  | 0.9 | 1.0  |
| No iodized salt                | 1.0  | 0.8 | 0.8  | 1.5  | 1.8 | 0.6 | 1.1 | 0.6 | 1.8  | 0.9 | 1.0 | 0.9 | 1.0 | 0.4 | 0.7 | 1.1  | 0.9 | 1.1  | 1.1 | 1.0 | 1.1 | 0.7   | 1.3  | 0.7 | 1.0  | 0.6  | 0.9 | 0.4  | 0.9 | 0.6 | 1.2 | 1.1 | 0.9  | 0.7 | 0.9  |
| Unsafe water                   | 1.0  | 1.0 | 1.0  | 1.2  | 1.1 | 0.9 | 1.0 | 0.7 | 0.8  | 1.1 | 1.0 | 0.9 | 1.2 | 1.0 | 0.4 | 1.2  | 1.0 | 0.6  | 1.0 | 1.3 | 1.3 | 0.6   | 1.3  | 1.1 | 0.8  | 0.9  | 1.2 | 1.1  | 1.0 | 1.1 | 1.0 | 1.5 | 1.3  | 0.9 | 0.6  |
| No care seeking for susp pneu  | 0.8  | 1.1 | 0.9  | 1.0  | 1.1 | 1.0 | 1.0 | 0.6 | 1.8  | 1.0 | 1.1 | 0.9 | 1.0 | 1.2 | 0.7 | 0.7  | 1.3 | 1.1  | 1.7 | 0.8 | 0.9 | 1.8   | 0.5  | 0.6 | 1.0  | 1.0  | 0.5 | 1.2  | 1.0 | 1.0 | 1.0 | 2.4 | 0.7  | 1.0 | 0.9  |

**Label: odds ratios**

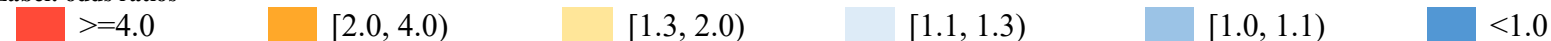

**Note:**

1. BJ= Benin, BF= Burkina Faso, BI= Burundi, CM=Cameroon, CI=Côte d'Ivoire, CD=The Democratic Republic of the Congo, ET=Ethiopia, GM=Gambia, GH=Ghana, GN=Guinea, HT=Haiti, IN=India, KE=Kenya, KG=Kyrgyzstan, KM=Comoros, LS=Lesotho, LR=Liberia, MW=Malawi, ML=Mali, MZ=Mozambique, MM=Myanmar, NA=Namibia, NP=Nepal, NE=Niger, PE=Peru, ST= São Tomé and Príncipe, SL=Sierra Leone, SZ=Swaziland, TD=Chad, TJ=Tajikistan, TZ=Tanzania, TG=Togo, UG=Uganda, ZM=Zambia, ZW=Zimbabwe.
2. Short maternal stature: maternal height <145cm; low maternal BMI: maternal BMI <18.5 kg/m2; child marriage: mother's age at marriage <18 years old; delayed breastfeeding: child was not initially breastfed within one hour after born; infectious disease: child was caught by infectious diseases two weeks prior to the survey.
3. Abbreviations - HH: household, BMI: body mass index; SBA: skilled birth attendant; ANC: antenatal care; ORT: oral rehydration therapy; FP: family planning; vit: vitamin; susp pneu: suspected pneumonia.



**B) Stunting, children 24-59 months old, total n=222,491**

|                                | BJ  | BF   | BI  | CM  | CI  | CD  | ET  | GM  | GH   | GN  | HT   | IN  | KE  | KG  | KM  | LS   | LR  | MW  | ML  | MZ  | MM  | NA  | NP  | NE  | PE  | ST   | SL   | SZ   | TD  | TJ  | TZ  | TG   | UG   | ZM  | ZW  |     |
|--------------------------------|-----|------|-----|-----|-----|-----|-----|-----|------|-----|------|-----|-----|-----|-----|------|-----|-----|-----|-----|-----|-----|-----|-----|-----|------|------|------|-----|-----|-----|------|------|-----|-----|-----|
| Short maternal stature         | 7.6 | 17.7 | 7.6 | 9.2 | 3.3 | 3.4 | 2.6 | 0.7 | 3.7  | 0.7 | 30.5 | 4.6 | 4.3 | 4.4 | 1.3 | 2.0  | 4.5 | 6.5 | 2.9 | 4.5 | 6.5 | 2.3 | 9.0 | 1.5 | 9.3 | 2.6  | 3.6  | 14.1 | 1.2 | 5.5 | 6.6 | 11.8 | 15.0 | 6.2 | 4.4 |     |
| Lack of maternal education     | 1.9 | 4.4  | 5.9 | 2.1 | 7.5 | 1.1 | 1.7 | 1.2 | 12.6 | 1.2 | 1.5  | 2.0 | 1.1 | 0.8 | 2.6 | 9.8  | 2.0 | 4.7 | 3.9 | 1.8 | 1.2 | 1.0 | 1.4 | 4.0 | 3.6 | 0.8  | 15.9 | 4.0  | 4.0 | 1.0 | 4.7 | 1.2  | 2.9  | 2.0 | 3.3 |     |
| Poorest HH wealth              | 2.9 | 2.7  | 2.3 | 5.0 | 1.7 | 3.0 | 2.3 | 2.1 | 1.9  | 1.8 | 3.4  | 1.6 | 3.1 | 1.2 | 1.3 | 25.7 | 2.2 | 2.1 | 3.0 | 3.1 | 1.9 | 4.0 | 3.0 | 1.1 | 8.6 | 12.3 | 1.8  | 1.8  | 1.1 | 1.3 | 2.1 | 3.2  | 3.3  | 2.1 | 1.5 |     |
| Low maternal BMI               | 1.9 | 2.0  | 2.2 | 1.9 | 2.6 | 1.6 | 1.6 | 0.7 | 2.2  | 0.7 | 2.0  | 1.7 | 1.5 | 2.3 | 1.7 | 2.5  | 2.9 | 2.0 | 2.1 | 2.3 | 1.7 | 3.0 | 2.0 | 1.3 | 2.4 | 1.4  | 1.8  | 6.5  | 1.6 | 1.6 | 1.9 | 2.5  | 1.5  | 2.0 | 1.8 |     |
| Poor dietary diversity         | 1.0 | 1.3  | 1.0 | 2.3 | 0.8 | 1.5 | 2.5 | 1.3 | 1.0  | 3.9 | 0.7  | 1.3 | 1.3 | 1.1 | 0.6 | 0.5  | 1.4 | 1.0 | 2.5 | 1.6 | 1.2 | 0.6 | 0.5 | 1.3 | 1.1 | 1.6  | 1.7  | 0.4  | 1.3 | 1.6 | 1.4 | 1.3  | 2.3  | 0.9 | 1.1 |     |
| No SBA                         | 1.4 | 1.4  | 1.1 | 1.0 | 0.9 | 0.9 | 0.9 | 1.3 | 1.8  | 1.4 | 1.1  | 1.1 | 1.4 | 0.3 | 1.2 | 1.4  | 0.9 | 1.1 | 1.2 | 1.0 | 1.5 | 1.6 | 1.0 | 1.1 | 1.5 | 1.1  | 0.9  | 2.7  | 1.2 | 1.3 | 1.1 | 1.0  | 1.1  | 0.9 | 1.3 |     |
| Less than four ANC visits      | 2.1 | 0.9  | 1.0 | 1.4 | 0.8 | 0.4 | 1.3 | 1.0 | 0.8  | 1.0 | 1.7  | 1.2 | 1.2 | 0.9 | 1.1 | 1.6  | 1.0 | 0.6 | 2.2 | 1.8 | 1.2 | 0.7 | 0.7 | 5.0 | 0.7 | 0.5  | 1.1  | 1.8  | 2.3 | 1.1 | 0.5 | 0.7  | 2.4  | 0.8 | 1.0 |     |
| Unimproved sanitation          | 1.0 | 0.9  | 1.2 | 0.9 | 1.5 | 0.9 | 1.2 | 1.3 | 0.9  | 1.0 | 1.2  | 1.1 | 1.2 | 1.3 | 0.9 | 0.7  | 1.1 | 1.0 | 1.0 | 1.1 | 1.2 | 1.6 | 1.8 | 1.0 | 1.3 | 0.4  | 0.9  | 0.8  | 0.8 | 1.0 | 1.2 | 0.9  | 0.8  | 1.0 | 1.2 |     |
| Had diarrhea, but not used ORT | 1.3 | 1.8  | 0.9 | 1.1 | 0.6 | 1.2 | 1.0 | 0.6 | 0.5  | 2.3 | 1.2  | 1.2 | 1.0 | 0.9 | 1.6 | 7.1  | 1.2 | 0.9 | 1.5 | 1.1 | 0.9 | 2.9 | 0.6 | 0.8 | 0.9 | 0.4  | 0.5  | 0.8  | 1.3 | 1.5 | 1.3 | 1.0  | 0.8  | 1.2 | 0.7 |     |
| Unsafe stool disposal          | 1.1 | 1.1  | 1.2 | 1.2 | 1.3 | 1.2 | 0.7 | 1.2 | 1.4  | 1.3 | 1.1  | 1.1 | 0.9 | 1.3 | 0.9 | 1.1  | 0.9 | 0.9 | 1.4 | 0.8 | 1.3 | 1.3 | 1.2 | 1.4 | 1.2 | 2.5  | 0.8  | 1.0  | 1.2 | 1.0 | 1.0 | 1.6  | 1.1  | 0.9 | 1.1 |     |
| High indoor pollution          | 1.4 | 0.9  | 1.0 | 1.2 | 1.6 | 6.9 | 1.1 | 0.5 | 0.7  | 0.6 | 1.7  | 1.1 | 0.9 | 1.3 | 0.7 | 0.5  | 1.0 | 2.3 | 0.3 | 1.9 | 0.8 | 2.5 | 1.1 | 2.0 | 1.0 | 1.0  | 0.4  | 0.9  | 1.5 | 1.2 | 1.5 | 1.9  | 1.0  | 1.2 | 1.8 |     |
| Not fully vaccinated           | 0.9 | 1.2  | 1.8 | 1.0 | 1.6 | 0.9 | 1.0 | 1.5 | 1.7  | 1.2 | 1.1  | 1.0 | 1.0 | 1.2 | 1.2 | 0.7  | 0.9 | 1.1 | 1.1 | 0.9 | 1.1 | 1.4 | 0.8 | 1.1 | 1.0 | 1.6  | 1.0  | 1.7  | 1.0 | 0.6 | 1.0 | 1.4  | 0.8  | 1.0 | 1.4 |     |
| Infectious disease             | 1.0 | 0.8  | 1.1 | 1.2 | 1.4 | 0.9 | 1.2 | 0.9 | 1.4  | 1.0 | 0.9  | 1.1 | 1.0 | 2.0 | 0.8 | 0.4  | 1.3 | 0.9 | 0.8 | 1.3 | 1.1 | 1.3 | 1.1 | 1.4 | 1.1 | 1.8  | 0.7  | 0.8  | 1.2 | 1.0 | 0.9 | 1.2  | 0.7  | 1.0 | 1.2 |     |
| Child marriage                 | 1.0 | 1.0  | 1.1 | 1.0 | 1.1 | 1.2 | 1.1 | 1.2 | 1.2  | 0.9 | 1.1  | 1.1 | 1.1 | 1.1 | 1.0 | 1.0  | 0.8 | 1.0 | 1.1 | 1.0 | 1.1 | 0.7 | 0.9 | 1.0 | 1.0 | 1.4  | 1.1  | 1.2  | 0.9 | 0.8 | 0.9 | 1.2  | 0.8  | 1.2 | 1.2 |     |
| Delayed breastfeeding          | 1.0 | 1.0  | 1.1 | 1.0 | 0.9 | 1.1 | 1.1 | 1.0 | 0.8  | 0.8 | 1.0  | 1.1 | 1.1 | 1.5 | 1.0 | 1.1  | 1.3 | 1.5 | 1.0 | 0.8 | 0.9 | 1.2 | 1.0 | 1.0 | 1.0 | 1.2  | 1.1  | 1.2  | 0.9 | 0.8 | 0.9 | 1.1  | 0.9  | 1.0 | 1.0 |     |
| FP need unsatisfied            | 1.2 | 1.0  | 0.9 | 1.2 | 1.0 | 1.1 | 1.1 | 1.2 | 0.8  | 1.0 | 1.0  | 1.0 | 0.9 | 1.3 | 1.3 | 0.9  | 1.1 | 1.3 | 1.2 | 1.0 | 1.1 | 1.3 | 0.8 | 0.9 | 0.9 | 0.6  | 1.2  | 1.6  | 1.1 | 1.0 | 0.9 | 0.9  | 1.0  | 1.1 | 1.0 |     |
| No vit A supplement            | 1.0 | 0.8  | 1.3 | 1.2 | 1.3 | 1.3 | 0.9 | 1.0 | 1.0  | 1.1 | 1.0  | 1.0 | 0.9 | 1.1 | 0.9 | 0.8  | 1.2 | 0.9 | 1.4 | 0.8 | 1.0 | 2.4 | 1.0 | 1.4 | 1.3 | 0.6  | 1.0  | 1.4  | 0.9 | 0.5 | 1.2 | 1.1  | 0.8  | 0.9 | 1.3 |     |
| No iodized salt                | 0.9 | 0.8  | 0.9 | 1.4 | 1.5 | 1.1 | 0.9 | 1.0 | 1.0  | 1.1 | 1.1  | 1.0 | 1.0 | 0.9 | 1.8 | 1.5  | 0.5 | 0.8 | 1.1 | 0.9 | 1.0 | 0.6 | 0.5 | 1.0 | 0.9 | 0.7  | 1.7  | 2.3  | 1.1 | 0.9 | 1.1 | 0.8  | 1.0  | 0.9 | 0.8 |     |
| Unsafe water                   | 0.9 | 0.9  | 0.9 | 1.2 | 0.8 | 1.1 | 1.0 | 0.8 | 0.6  | 1.0 | 0.9  | 0.9 | 1.0 | 1.3 | 1.3 | 0.7  | 0.9 | 1.2 | 1.2 | 1.0 | 1.3 | 0.9 | 1.3 | 0.9 | 0.8 | 1.1  | 1.0  | 1.2  | 0.9 | 1.0 | 1.1 | 0.9  | 0.9  | 1.1 | 1.1 |     |
| No care seeking for susp pneu  | 1.0 | 1.3  | 1.0 | 1.0 | 1.1 | 1.5 | 1.0 | 0.9 | 0.4  | 1.0 | 1.2  | 1.0 | 1.0 | 0.5 | 1.4 | 2.3  | 0.7 | 1.1 | 0.9 | 0.8 | 1.0 | 1.3 | 1.0 | 0.7 | 1.0 | 1.0  | 1.1  | 1.0  | 1.0 | 1.0 | 1.0 | 1.0  | 0.7  | 0.6 | 1.0 | 0.9 |

Label: odds ratios

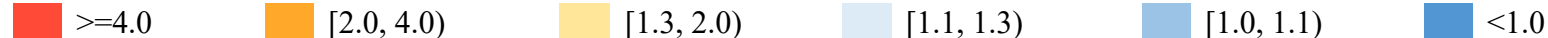

**C) Underweight, children 12-23 months old, total n=76,862**

|                                | BJ  | BF  | BI  | CM  | CI  | CD   | ET  | GM  | GH  | GN  | HT   | IN  | KE  | KG   | KM  | LS   | LR   | MW   | ML  | MZ  | MM  | NA   | NP  | NE  | PE   | ST   | SL  | SZ   | TD  | TJ  | TZ  | TG  | UG  | ZM  | ZW  |
|--------------------------------|-----|-----|-----|-----|-----|------|-----|-----|-----|-----|------|-----|-----|------|-----|------|------|------|-----|-----|-----|------|-----|-----|------|------|-----|------|-----|-----|-----|-----|-----|-----|-----|
| Short maternal stature         | 4.3 | 2.5 | 5.6 | 2.1 | 1.0 | 1.8  | 8.3 | 1.0 | 5.6 | 4.5 | 17.2 | 3.6 | 7.6 | 1.0  | 2.6 | 1.5  | 26.9 | 8.1  | 0.0 | 7.3 | 5.7 | 1.0  | 3.7 | 0.3 | 2.5  | 1.0  | 1.8 | 0.3  | 0.0 | 1.0 | 5.0 | 9.6 | 3.8 | 6.3 | 1.0 |
| Lack of maternal education     | 1.3 | 1.6 | 0.2 | 2.3 | 2.8 | 11.0 | 4.9 | 0.5 | 1.0 | 2.0 | 0.5  | 2.0 | 2.5 | 1.5  | 1.0 | 1.0  | 3.4  | 1.1  | 8.0 | 3.4 | 1.7 | 18.6 | 1.1 | 1.2 | 1.1  | 3.8  | 0.0 | 17.5 | 1.3 | 3.1 | 1.0 | 1.4 | 3.9 | 1.9 | 2.9 |
| Poorest HH wealth              | 0.7 | 0.8 | 3.1 | 0.8 | 0.8 | 0.8  | 3.2 | 0.6 | 3.2 | 2.3 | 9.8  | 1.6 | 2.7 | 1.5  | 5.1 | 1.5  | 1.5  | 1.0  | 1.7 | 1.1 | 0.6 | 1.0  | 1.2 | 0.8 | 1.0  | 5.6  | 2.5 | 50.0 | 1.0 | 1.0 | 1.5 | 8.0 | 2.9 | 1.5 | 2.5 |
| Low maternal BMI               | 6.0 | 4.2 | 7.6 | 4.6 | 6.4 | 3.1  | 2.0 | 2.5 | 6.3 | 4.1 | 11.3 | 2.6 | 1.6 | 2.1  | 5.3 | 1.0  | 8.7  | 12.6 | 3.5 | 2.6 | 3.8 | 0.5  | 1.9 | 3.8 | 14.4 | 34.3 | 1.2 | 1.0  | 1.9 | 4.8 | 2.0 | 3.0 | 6.5 | 4.4 | 4.5 |
| Poor dietary diversity         | 1.3 | 1.2 | 1.7 | 3.1 | 1.3 | 1.9  | 2.7 | 5.2 | 1.4 | 2.2 | 1.8  | 1.5 | 0.8 | 8.0  | 4.9 | 1.0  | 3.3  | 0.8  | 2.3 | 1.8 | 0.4 | 0.5  | 3.5 | 1.8 | 2.2  | 1.0  | 1.3 | 1.8  | 1.3 | 4.4 | 1.4 | 1.1 | 2.6 | 1.0 | 0.3 |
| No SBA                         | 1.3 | 1.8 | 1.9 | 1.7 | 0.9 | 1.5  | 1.1 | 1.3 | 1.6 | 1.2 | 0.4  | 1.2 | 1.4 | 1.0  | 0.5 | 1.6  | 1.3  | 2.0  | 1.1 | 0.9 | 1.6 | 0.4  | 1.0 | 1.1 | 1.2  | 1.5  | 1.5 | 0.2  | 1.2 | 1.2 | 0.8 | 2.1 | 0.9 | 1.3 | 1.7 |
| Less than four ANC visits      | 0.8 | 0.1 | 0.8 | 1.5 | 1.3 | 1.0  | 1.1 | 2.6 | 1.0 | 1.4 | 1.2  | 1.1 | 2.5 | 0.6  | 1.4 | 0.7  | 1.1  | 0.2  | 0.6 | 1.2 | 2.6 | 20.9 | 4.2 | 0.7 | 0.7  | 1.0  | 1.2 | 0.0  | 0.7 | 1.5 | 1.0 | 3.3 | 2.0 | 3.6 | 3.0 |
| Unimproved sanitation          | 1.0 | 1.5 | 1.2 | 1.3 | 1.1 | 1.1  | 2.3 | 1.7 | 0.6 | 0.9 | 1.6  | 1.3 | 0.8 | 21.2 | 1.7 | 0.2  | 1.4  | 0.8  | 1.1 | 0.9 | 0.6 | 0.0  | 1.6 | 1.1 | 1.4  | 0.6  | 1.5 | 0.1  | 0.8 | 1.5 | 0.9 | 0.7 | 0.6 | 1.3 | 1.2 |
| Had diarrhea, but not used ORT | 1.2 | 0.8 | 1.7 | 1.0 | 1.8 | 1.0  | 2.4 | 1.4 | 1.3 | 1.3 | 0.5  | 1.1 | 1.7 | 1.0  | 1.7 | 11.5 | 1.5  | 6.7  | 0.6 | 2.2 | 0.6 | 5.9  | 0.7 | 1.8 | 1.2  | 3.8  | 2.3 | 1.0  | 1.3 | 5.2 | 0.7 | 0.7 | 1.3 | 0.8 | 0.6 |
| Unsafe stool disposal          | 0.9 | 1.2 | 1.4 | 1.0 | 1.6 | 0.8  | 1.3 | 2.2 | 1.6 | 0.9 | 1.7  | 1.1 | 1.2 | 1.5  | 0.7 | 2.6  | 0.9  | 0.6  | 1.2 | 1.2 | 0.8 | 1.5  | 0.9 | 1.7 | 0.8  | 0.4  | 1.1 | 6.6  | 1.4 | 2.3 | 1.4 | 0.9 | 1.4 | 1.1 | 0.8 |
| High indoor pollution          | 2.3 | 2.2 | 0.3 | 4.7 | 3.7 | 1.0  | 1.1 | 0.1 | 1.0 | 6.1 | 1.0  | 1.1 | 2.5 | 2.2  | 0.7 | 0.3  | 1.0  | 1.0  | 0.3 | 1.4 | 2.2 | 0.7  | 2.4 | 0.9 | 0.8  | 0.3  | 1.0 | 0.0  | 1.1 | 0.9 | 2.1 | 2.0 | 1.0 | 3.5 | 0.7 |
| Not fully vaccinated           | 1.2 | 0.8 | 1.0 | 1.8 | 1.0 | 0.9  | 0.8 | 0.4 | 0.8 | 1.0 | 1.3  | 1.0 | 1.4 | 0.3  | 2.9 | 0.2  | 1.0  | 1.5  | 1.1 | 1.2 | 1.1 | 3.7  | 1.0 | 1.1 | 1.2  | 1.0  | 1.4 | 12.5 | 1.5 | 0.8 | 1.2 | 1.2 | 0.8 | 1.0 | 1.0 |
| Infectious disease             | 1.2 | 1.4 | 0.8 | 1.1 | 0.7 | 0.7  | 1.0 | 0.9 | 1.0 | 1.2 | 1.3  | 1.0 | 0.9 | 0.0  | 1.4 | 0.1  | 1.5  | 0.6  | 2.4 | 1.2 | 1.4 | 0.1  | 0.8 | 1.2 | 1.2  | 0.3  | 1.7 | 0.0  | 1.1 | 0.2 | 1.0 | 1.7 | 0.6 | 1.0 | 1.0 |
| Child marriage                 | 1.1 | 1.0 | 1.0 | 0.9 | 0.6 | 1.2  | 0.8 | 0.8 | 0.5 | 1.5 | 0.4  | 1.0 | 0.7 | 1.0  | 0.5 | 1.5  | 1.3  | 1.2  | 1.0 | 1.1 | 1.2 | 0.0  | 1.0 | 1.5 | 0.9  | 1.0  | 0.7 | 1.9  | 1.0 | 1.5 | 0.6 | 1.2 | 0.5 | 1.1 | 1.3 |
| Delayed breastfeeding          | 1.0 | 0.8 | 1.3 | 1.6 | 1.0 | 1.0  | 0.9 | 0.6 | 0.5 | 1.1 | 1.6  | 1.0 | 0.8 | 1.1  | 1.5 | 5.7  | 2.7  | 0.5  | 0.9 | 0.9 | 1.3 | 21.4 | 0.9 | 0.9 | 1.3  | 2.5  | 1.7 | 5.4  | 0.8 | 1.4 | 1.1 | 0.7 | 1.2 | 1.4 | 1.2 |
| FP need unsatisfied            | 1.3 | 1.1 | 0.8 | 1.1 | 0.8 | 1.1  | 0.9 | 0.9 | 0.6 | 0.6 | 2.4  | 0.9 | 0.8 | 1.1  | 3.0 | 0.3  | 1.4  | 0.7  | 0.9 | 0.9 | 0.7 | 0.3  | 1.0 | 1.0 | 0.8  | 2.2  | 0.8 | 23.5 | 0.8 | 0.7 | 1.2 | 1.6 | 0.7 | 0.8 | 1.2 |
| No vit A supplement            | 1.0 | 0.9 | 1.2 | 1.3 | 1.1 | 1.5  | 0.6 | 7.4 | 0.5 | 1.2 | 0.7  | 1.1 | 0.8 | 1.7  | 1.2 | 0.4  | 0.9  | 1.1  | 1.0 | 1.5 | 1.0 | 0.1  | 0.9 | 1.3 | 1.4  | 20.9 | 0.6 | 1.0  | 0.9 | 1.2 | 0.8 | 0.8 | 1.1 | 1.1 | 0.8 |
| No iodized salt                | 0.9 | 1.0 | 2.7 | 0.7 | 0.4 | 2.3  | 1.1 | 0.5 | 1.4 | 1.2 | 2.1  | 0.9 | 0.8 | 1.9  | 0.6 | 2.6  | 0.9  | 0.6  | 1.3 | 0.9 | 0.8 | 2.2  | 1.8 | 0.7 | 0.5  | 0.9  | 1.3 | 26.2 | 1.0 | 1.2 | 1.3 | 1.1 | 0.8 | 0.8 | 3.0 |
| Unsafe water                   | 1.0 | 1.1 | 1.3 | 1.3 | 0.9 | 1.4  | 0.7 | 1.2 | 1.4 | 1.1 | 0.8  | 1.0 | 1.0 | 1.0  | 0.5 | 0.7  | 0.9  | 0.9  | 0.9 | 1.4 | 1.3 | 0.3  | 1.0 | 0.9 | 0.6  | 1.2  | 1.7 | 1.1  | 1.0 | 0.9 | 0.9 | 0.7 | 1.7 | 0.9 | 0.9 |
| No care seeking for susp pneu  | 0.9 | 0.9 | 1.2 | 1.0 | 2.0 | 1.2  | 1.0 | 1.0 | 3.0 | 1.0 | 0.9  | 0.9 | 1.0 | 1.0  | 0.2 | 2.4  | 1.3  | 1.0  | 1.7 | 0.9 | 0.4 | 1.0  | 0.8 | 0.8 | 1.0  | 1.0  | 1.2 | 6.1  | 1.0 | 1.0 | 1.0 | 0.7 | 0.4 | 1.0 | 1.1 |

Label: odds ratios

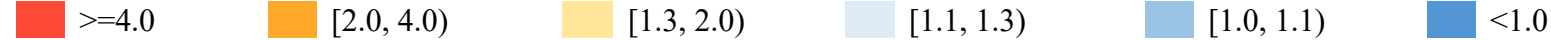

**D) Underweight, children 24-59 months old, total n=222,491**

|                                | BJ  | BF  | BI  | CM  | CI  | CD  | ET  | GM  | GH  | GN  | HT  | IN  | KE  | KG  | KM  | LS  | LR  | MW  | ML  | MZ  | MM  | NA  | NP  | NE  | PE   | ST   | SL  | SZ   | TD  | TJ  | TZ  | TG  | UG  | ZM  | ZW  |
|--------------------------------|-----|-----|-----|-----|-----|-----|-----|-----|-----|-----|-----|-----|-----|-----|-----|-----|-----|-----|-----|-----|-----|-----|-----|-----|------|------|-----|------|-----|-----|-----|-----|-----|-----|-----|
| Short maternal stature         | 4.2 | 7.6 | 3.4 | 3.4 | 3.9 | 4.0 | 3.3 | 3.3 | 1.8 | 1.2 | 6.7 | 3.4 | 3.6 | 1.0 | 1.5 | 7.6 | 4.6 | 6.4 | 2.7 | 3.4 | 4.4 | 1.0 | 2.2 | 3.1 | 19.3 | 6.5  | 3.0 | 12.0 | 1.3 | 2.5 | 6.5 | 5.0 | 7.1 | 4.0 | 5.1 |
| Lack of maternal education     | 4.4 | 1.8 | 1.7 | 2.4 | 7.2 | 0.7 | 2.3 | 1.1 | 6.2 | 1.7 | 2.2 | 1.7 | 1.9 | 1.0 | 3.5 | 4.6 | 0.6 | 0.7 | 2.5 | 2.3 | 0.6 | 1.0 | 1.2 | 1.5 | 3.9  | 0.5  | 1.8 | 4.3  | 1.6 | 0.5 | 1.4 | 1.3 | 8.9 | 1.3 | 2.9 |
| Poorest HH wealth              | 1.7 | 1.5 | 2.8 | 5.0 | 1.4 | 4.0 | 1.7 | 1.4 | 0.6 | 1.1 | 1.0 | 1.6 | 2.6 | 0.7 | 1.3 | 5.1 | 1.7 | 2.3 | 1.5 | 3.1 | 1.0 | 5.0 | 1.4 | 1.4 | 5.5  | 13.3 | 0.9 | 5.8  | 1.3 | 1.1 | 2.2 | 0.8 | 2.8 | 2.0 | 0.5 |
| Low maternal BMI               | 3.0 | 3.4 | 6.7 | 6.8 | 9.2 | 2.4 | 2.8 | 1.8 | 3.4 | 2.6 | 3.9 | 2.6 | 4.1 | 7.0 | 3.3 | 8.2 | 6.0 | 2.6 | 2.3 | 7.8 | 3.7 | 1.7 | 4.5 | 3.2 | 5.2  | 3.8  | 2.5 | 3.4  | 3.1 | 2.8 | 4.1 | 6.4 | 3.2 | 2.3 | 7.5 |
| Poor dietary diversity         | 1.0 | 1.0 | 1.0 | 3.0 | 0.9 | 1.2 | 1.7 | 0.6 | 1.1 | 2.4 | 0.7 | 1.3 | 0.9 | 1.0 | 0.6 | 0.4 | 0.8 | 1.8 | 1.4 | 1.6 | 3.3 | 1.1 | 0.8 | 1.0 | 0.5  | 1.1  | 1.0 | 0.4  | 1.2 | 0.9 | 1.1 | 1.2 | 2.1 | 0.8 | 0.3 |
| No SBA                         | 1.7 | 1.3 | 1.4 | 1.2 | 0.7 | 1.1 | 1.0 | 1.3 | 1.6 | 2.2 | 1.4 | 1.1 | 1.3 | 1.0 | 1.3 | 1.1 | 1.1 | 1.2 | 1.3 | 0.7 | 1.6 | 1.7 | 1.0 | 1.0 | 1.0  | 1.2  | 0.9 | 2.5  | 1.4 | 1.1 | 1.0 | 1.1 | 1.4 | 1.2 | 1.0 |
| Less than four ANC visits      | 1.5 | 1.3 | 0.8 | 2.9 | 0.2 | 0.3 | 3.3 | 1.8 | 1.0 | 0.8 | 1.6 | 1.1 | 1.0 | 0.9 | 1.0 | 0.7 | 0.6 | 0.9 | 1.8 | 0.8 | 1.5 | 0.3 | 0.5 | 1.0 | 1.0  | 1.2  | 1.6 | 0.3  | 1.9 | 1.4 | 0.7 | 0.9 | 0.8 | 1.4 | 0.7 |
| Unimproved sanitation          | 0.9 | 1.1 | 1.1 | 0.9 | 1.3 | 1.0 | 1.1 | 1.0 | 1.3 | 1.0 | 1.5 | 1.1 | 1.1 | 1.5 | 0.7 | 0.7 | 1.2 | 0.7 | 1.1 | 1.1 | 1.2 | 0.9 | 2.0 | 1.0 | 1.3  | 1.0  | 1.5 | 0.9  | 1.2 | 1.1 | 1.0 | 1.0 | 0.8 | 1.1 | 1.4 |
| Had diarrhea, but not used ORT | 1.2 | 1.4 | 1.3 | 1.7 | 0.4 | 1.3 | 1.5 | 1.3 | 0.7 | 2.2 | 1.7 | 1.2 | 1.1 | 1.0 | 1.4 | 1.1 | 1.5 | 0.4 | 2.0 | 1.2 | 0.4 | 6.1 | 1.2 | 0.7 | 1.3  | 1.2  | 1.1 | 1.0  | 1.5 | 1.4 | 1.7 | 1.5 | 0.9 | 1.0 | 0.5 |
| Unsafe stool disposal          | 1.0 | 1.1 | 1.2 | 1.3 | 1.0 | 1.3 | 1.0 | 0.8 | 1.3 | 1.3 | 1.0 | 1.1 | 1.0 | 1.4 | 1.5 | 1.2 | 1.2 | 1.8 | 1.3 | 1.1 | 1.6 | 3.2 | 0.9 | 1.5 | 1.1  | 2.2  | 0.7 | 0.8  | 1.1 | 0.6 | 1.3 | 1.3 | 1.6 | 0.8 | 1.1 |
| High indoor pollution          | 1.0 | 1.3 | 0.3 | 0.6 | 1.3 | 1.0 | 0.6 | 4.2 | 1.5 | 1.8 | 6.0 | 1.0 | 1.6 | 1.4 | 0.7 | 0.7 | 0.3 | 1.0 | 2.0 | 1.4 | 0.9 | 9.1 | 1.3 | 1.4 | 1.1  | 0.5  | 1.0 | 0.3  | 1.2 | 0.9 | 2.3 | 6.7 | 1.0 | 1.1 | 2.1 |
| Not fully vaccinated           | 0.9 | 1.2 | 2.0 | 1.2 | 1.3 | 1.0 | 1.3 | 1.1 | 1.3 | 1.0 | 1.4 | 1.0 | 0.9 | 1.0 | 1.5 | 0.7 | 1.0 | 1.2 | 1.1 | 0.9 | 1.0 | 1.1 | 0.7 | 1.0 | 0.8  | 2.0  | 1.3 | 1.4  | 1.4 | 0.7 | 1.2 | 1.4 | 1.0 | 1.3 | 0.7 |
| Infectious disease             | 1.3 | 1.1 | 0.8 | 1.1 | 3.2 | 1.3 | 0.9 | 0.5 | 1.6 | 0.9 | 0.5 | 1.0 | 1.0 | 3.9 | 0.7 | 0.8 | 1.2 | 1.2 | 0.7 | 1.2 | 1.4 | 0.2 | 1.8 | 1.7 | 1.3  | 0.9  | 0.6 | 2.2  | 0.9 | 1.1 | 1.2 | 1.0 | 0.7 | 1.4 | 1.5 |
| Child marriage                 | 0.9 | 1.0 | 1.1 | 1.0 | 1.0 | 1.1 | 1.0 | 1.0 | 0.6 | 0.8 | 1.0 | 1.0 | 0.9 | 0.9 | 1.2 | 0.9 | 0.8 | 1.1 | 1.0 | 0.9 | 1.3 | 0.5 | 0.9 | 1.0 | 1.0  | 1.5  | 1.1 | 0.7  | 0.8 | 0.8 | 1.0 | 1.3 | 1.0 | 1.0 | 1.3 |
| Delayed breastfeeding          | 1.1 | 1.0 | 1.1 | 0.9 | 0.5 | 0.9 | 1.0 | 0.9 | 0.8 | 0.8 | 1.1 | 1.0 | 0.9 | 1.1 | 1.2 | 1.0 | 1.0 | 1.5 | 1.1 | 0.8 | 0.9 | 1.3 | 0.9 | 1.0 | 1.0  | 1.3  | 1.0 | 0.6  | 0.9 | 0.9 | 0.9 | 1.0 | 1.2 | 1.1 | 1.0 |
| FP need unsatisfied            | 1.1 | 1.2 | 1.1 | 1.2 | 1.4 | 0.8 | 1.1 | 1.0 | 0.9 | 1.4 | 0.8 | 1.0 | 1.1 | 1.2 | 1.2 | 0.9 | 1.5 | 1.1 | 1.0 | 1.1 | 0.9 | 1.2 | 0.8 | 1.0 | 1.0  | 0.5  | 1.3 | 0.6  | 1.0 | 1.1 | 1.4 | 1.1 | 1.0 | 1.1 | 1.5 |
| No vit A supplement            | 1.2 | 0.9 | 1.3 | 1.2 | 1.3 | 1.1 | 0.9 | 1.2 | 1.2 | 1.9 | 1.6 | 1.0 | 1.0 | 1.3 | 1.0 | 0.6 | 0.9 | 0.7 | 1.0 | 0.7 | 1.0 | 1.7 | 1.7 | 1.3 | 1.6  | 1.8  | 1.3 | 0.4  | 0.8 | 0.5 | 1.1 | 1.0 | 1.2 | 0.8 | 0.7 |
| No iodized salt                | 0.8 | 1.0 | 1.5 | 1.6 | 4.8 | 1.6 | 1.2 | 0.8 | 1.2 | 1.4 | 1.5 | 0.9 | 0.7 | 0.7 | 0.7 | 1.0 | 0.2 | 1.3 | 0.9 | 0.8 | 0.8 | 0.6 | 0.9 | 1.0 | 5.4  | 1.4  | 1.2 | 0.8  | 0.8 | 1.2 | 1.2 | 0.8 | 1.2 | 0.9 | 1.4 |
| Unsafe water                   | 0.9 | 1.0 | 1.0 | 1.0 | 0.6 | 1.1 | 1.0 | 1.1 | 0.8 | 0.9 | 0.8 | 1.0 | 1.1 | 0.5 | 1.4 | 0.6 | 0.7 | 1.2 | 1.0 | 1.0 | 1.2 | 1.1 | 1.2 | 0.9 | 1.2  | 1.2  | 1.4 | 0.8  | 0.8 | 0.7 | 1.0 | 1.1 | 0.9 | 1.0 | 1.1 |
| No care seeking for susp pneu  | 1.1 | 0.9 | 1.4 | 1.0 | 0.6 | 1.3 | 1.0 | 1.2 | 0.4 | 1.0 | 2.1 | 0.9 | 1.0 | 0.4 | 1.2 | 0.3 | 0.6 | 0.8 | 1.3 | 1.6 | 0.9 | 4.0 | 1.1 | 0.6 | 1.0  | 1.0  | 1.7 | 0.4  | 1.0 | 1.0 | 1.0 | 0.6 | 0.9 | 1.0 | 0.8 |

Label: odds ratios

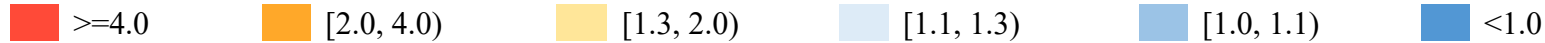

**E) Wasting, children 12-23 months old, total n=76,862**

|                                | BJ   | BF  | BI  | CM  | CI  | CD  | ET   | GM   | GH   | GN  | HT  | IN  | KE  | KG   | KM   | LS  | LR   | MW  | ML  | MZ  | MM  | NA   | NP  | NE  | PE   | ST   | SL  | SZ  | TD  | TJ  | TZ  | TG   | UG  | ZM  | ZW   |
|--------------------------------|------|-----|-----|-----|-----|-----|------|------|------|-----|-----|-----|-----|------|------|-----|------|-----|-----|-----|-----|------|-----|-----|------|------|-----|-----|-----|-----|-----|------|-----|-----|------|
| Short maternal stature         | 1.0  | 2.4 | 0.5 | 2.4 | 1.0 | 3.2 | 3.9  | 1.0  | 1.0  | 1.0 | 1.0 | 1.5 | 1.0 | 1.0  | 4.5  | 1.0 | 1.0  | 6.5 | 1.0 | 3.7 | 0.9 | 1.0  | 0.6 | 2.1 | 1.4  | 1.0  | 0.4 | 1.0 | 1.3 | 1.0 | 1.2 | 21.8 | 3.0 | 1.2 | 5.7  |
| Lack of maternal education     | 0.8  | 2.9 | 0.0 | 2.9 | 7.9 | 1.1 | 0.7  | 1.0  | 1.0  | 1.2 | 1.1 | 1.1 | 1.9 | 6.2  | 0.7  | 1.0 | 0.3  | 1.0 | 4.8 | 1.6 | 0.5 | 26.6 | 1.9 | 0.6 | 1.0  | 8.1  | 0.8 | 1.0 | 1.0 | 1.6 | 2.0 | 1.9  | 1.3 | 1.0 | 1.0  |
| Poorest HH wealth              | 0.5  | 0.9 | 1.2 | 0.6 | 1.9 | 0.6 | 6.2  | 2.4  | 3.3  | 1.3 | 1.1 | 1.4 | 1.8 | 0.4  | 1.7  | 0.0 | 0.3  | 0.8 | 1.0 | 2.4 | 3.0 | 1.0  | 0.5 | 3.3 | 0.2  | 0.4  | 0.5 | 1.0 | 0.9 | 1.3 | 0.8 | 3.3  | 5.3 | 5.9 | 32.0 |
| Low maternal BMI               | 10.4 | 3.1 | 1.0 | 4.2 | 6.5 | 4.2 | 1.7  | 1.9  | 3.3  | 2.8 | 4.0 | 2.1 | 1.2 | 0.8  | 1.7  | 1.0 | 1.0  | 2.5 | 2.1 | 1.2 | 1.5 | 18.2 | 1.5 | 3.2 | 28.3 | 9.0  | 4.7 | 1.0 | 5.2 | 2.8 | 1.3 | 7.4  | 1.0 | 1.3 | 2.9  |
| Poor dietary diversity         | 1.5  | 4.8 | 1.0 | 3.5 | 1.1 | 1.1 | 3.0  | 2.6  | 0.3  | 9.1 | 0.3 | 1.4 | 1.8 | 0.0  | 14.0 | 1.0 | 0.4  | 2.5 | 1.4 | 1.2 | 1.0 | 0.2  | 6.2 | 0.8 | 2.6  | 12.5 | 1.8 | 1.0 | 1.4 | 1.2 | 6.1 | 0.5  | 0.5 | 1.1 | 2.9  |
| No SBA                         | 1.4  | 1.6 | 2.6 | 4.9 | 0.6 | 1.4 | 1.4  | 0.6  | 0.9  | 0.8 | 1.6 | 1.1 | 1.7 | 1.0  | 0.9  | 0.0 | 2.0  | 2.9 | 1.1 | 0.7 | 1.4 | 2.2  | 1.0 | 0.8 | 2.5  | 0.8  | 1.1 | 1.0 | 0.8 | 1.4 | 0.9 | 2.6  | 0.8 | 2.3 | 0.7  |
| Less than four ANC visits      | 0.6  | 0.3 | 1.0 | 0.4 | 0.4 | 1.1 | 7.9  | 19.0 | 3.3  | 0.5 | 1.9 | 1.0 | 7.9 | 0.6  | 0.8  | 0.0 | 1.8  | 0.3 | 0.6 | 0.2 | 1.0 | 26.4 | 2.2 | 0.4 | 1.2  | 10.9 | 0.8 | 0.0 | 1.0 | 2.8 | 0.9 | 0.1  | 1.2 | 0.8 | 4.0  |
| Unimproved sanitation          | 1.3  | 0.9 | 1.3 | 2.4 | 0.8 | 0.8 | 0.7  | 1.2  | 1.1  | 0.8 | 0.9 | 1.2 | 0.7 | 18.8 | 1.5  | 1.0 | 0.9  | 0.3 | 1.4 | 0.8 | 0.8 | 0.0  | 0.9 | 0.9 | 1.9  | 1.0  | 4.0 | 0.0 | 1.4 | 1.0 | 0.3 | 1.3  | 0.5 | 1.1 | 1.4  |
| Had diarrhea, but not used ORT | 1.3  | 1.1 | 2.2 | 1.0 | 0.8 | 1.8 | 1.2  | 0.7  | 43.3 | 0.8 | 0.3 | 1.1 | 2.6 | 1.0  | 1.1  | 1.0 | 13.5 | 6.2 | 0.8 | 1.1 | 0.6 | 0.4  | 2.8 | 1.8 | 0.4  | 2.6  | 3.0 | 1.0 | 0.8 | 2.1 | 0.5 | 1.1  | 0.5 | 2.9 | 1.0  |
| Unsafe stool disposal          | 0.7  | 1.5 | 1.0 | 0.7 | 0.9 | 0.4 | 1.2  | 1.5  | 0.5  | 0.5 | 1.3 | 1.0 | 1.0 | 0.5  | 1.1  | 1.0 | 0.9  | 0.4 | 1.2 | 1.1 | 0.8 | 0.1  | 1.8 | 1.2 | 1.1  | 0.6  | 1.7 | 1.0 | 1.6 | 1.5 | 1.5 | 0.6  | 0.3 | 0.8 | 0.8  |
| High indoor pollution          | 2.4  | 0.7 | 0.2 | 1.8 | 5.0 | 1.0 | 10.8 | 0.1  | 0.1  | 6.2 | 1.0 | 1.0 | 1.0 | 0.4  | 1.5  | 1.0 | 1.0  | 0.5 | 2.7 | 1.8 | 0.7 | 7.5  | 1.3 | 1.1 | 7.0  | 0.8  | 1.0 | 0.0 | 2.3 | 0.6 | 1.0 | 0.4  | 1.0 | 0.4 | 0.5  |
| Not fully vaccinated           | 1.4  | 1.1 | 0.9 | 1.4 | 0.5 | 1.2 | 0.7  | 1.1  | 1.1  | 1.0 | 1.8 | 1.0 | 1.3 | 4.0  | 1.8  | 1.0 | 1.5  | 1.6 | 0.9 | 1.1 | 2.3 | 0.6  | 0.9 | 1.1 | 2.5  | 0.4  | 1.7 | 0.0 | 1.5 | 1.3 | 1.6 | 1.1  | 0.9 | 1.1 | 0.6  |
| Infectious disease             | 1.3  | 1.5 | 0.8 | 0.8 | 2.4 | 1.6 | 1.7  | 1.5  | 0.1  | 2.3 | 0.1 | 1.0 | 0.7 | 0.0  | 1.1  | 0.0 | 0.3  | 0.7 | 2.2 | 1.4 | 1.4 | 0.0  | 1.4 | 1.5 | 6.3  | 0.1  | 1.2 | 1.0 | 1.7 | 0.6 | 2.3 | 1.5  | 1.2 | 0.5 | 0.6  |
| Child marriage                 | 1.2  | 0.8 | 1.0 | 0.7 | 1.1 | 1.1 | 1.4  | 0.8  | 1.2  | 1.1 | 0.7 | 1.0 | 0.7 | 1.0  | 0.3  | 0.0 | 0.4  | 1.0 | 1.1 | 0.8 | 0.9 | 0.2  | 0.8 | 1.2 | 1.4  | 1.0  | 1.7 | 0.0 | 0.9 | 1.7 | 0.7 | 2.6  | 0.5 | 1.3 | 1.2  |
| Delayed breastfeeding          | 1.3  | 1.2 | 1.1 | 1.2 | 0.5 | 0.9 | 0.8  | 0.7  | 0.5  | 0.4 | 2.0 | 1.0 | 1.0 | 1.4  | 0.5  | 0.0 | 3.3  | 0.4 | 1.0 | 0.9 | 0.8 | 1.0  | 0.8 | 0.9 | 1.1  | 1.1  | 1.4 | 1.0 | 1.3 | 1.8 | 1.7 | 0.8  | 0.9 | 1.6 | 0.8  |
| FP need unsatisfied            | 1.0  | 1.1 | 0.8 | 0.9 | 1.2 | 0.8 | 0.9  | 0.8  | 0.8  | 0.5 | 1.5 | 1.0 | 0.7 | 1.3  | 2.4  | 1.0 | 0.9  | 2.7 | 0.7 | 0.8 | 0.7 | 0.1  | 1.6 | 0.9 | 0.8  | 0.7  | 0.8 | 1.0 | 0.9 | 0.8 | 1.0 | 1.2  | 1.0 | 1.0 | 0.3  |
| No vit A supplement            | 1.5  | 1.2 | 0.9 | 0.6 | 0.6 | 2.4 | 0.8  | 2.2  | 5.9  | 0.7 | 1.3 | 1.0 | 1.2 | 3.0  | 0.9  | 1.0 | 1.3  | 2.1 | 0.7 | 1.7 | 0.7 | 0.1  | 0.3 | 1.3 | 0.1  | 2.2  | 0.3 | 1.0 | 0.9 | 1.0 | 1.2 | 1.0  | 0.7 | 0.9 | 0.4  |
| No iodized salt                | 1.7  | 0.6 | 2.6 | 0.4 | 0.5 | 1.4 | 0.8  | 0.4  | 0.7  | 1.0 | 5.6 | 1.0 | 0.6 | 1.0  | 0.9  | 0.0 | 6.1  | 5.0 | 1.1 | 1.0 | 0.9 | 1.0  | 8.9 | 0.7 | 0.1  | 2.6  | 0.9 | 0.0 | 1.0 | 2.1 | 0.7 | 1.7  | 0.3 | 1.4 | 0.9  |
| Unsafe water                   | 1.1  | 1.0 | 1.8 | 0.7 | 0.7 | 0.9 | 1.1  | 0.9  | 1.0  | 0.8 | 1.1 | 1.1 | 1.2 | 1.7  | 1.1  | 0.0 | 1.1  | 1.6 | 0.7 | 0.9 | 1.3 | 0.0  | 1.1 | 1.0 | 1.7  | 0.5  | 1.2 | 0.0 | 0.9 | 0.7 | 0.7 | 1.0  | 3.7 | 1.0 | 1.2  |
| No care seeking for susp pneu  | 1.1  | 1.0 | 1.3 | 1.0 | 0.7 | 0.8 | 1.0  | 2.0  | 1.2  | 1.0 | 4.4 | 0.8 | 1.0 | 1.0  | 0.9  | 1.0 | 4.6  | 1.4 | 1.3 | 1.2 | 0.8 | 22.7 | 1.5 | 0.9 | 1.0  | 1.0  | 1.6 | 1.0 | 1.0 | 1.0 | 1.0 | 0.9  | 1.1 | 1.0 | 0.7  |

Label: odds ratios

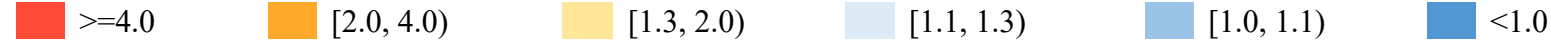

**F) Wasting, children 24-59 months old, total n=222,491**

|                                | BJ  | BF  | BI  | CM   | CI  | CD  | ET  | GM   | GH  | GN  | HT  | IN  | KE  | KG  | KM  | LS   | LR  | MW   | ML  | MZ  | MM  | NA   | NP  | NE  | PE   | ST   | SL  | SZ   | TD  | TJ  | TZ  | TG  | UG   | ZM  | ZW  |
|--------------------------------|-----|-----|-----|------|-----|-----|-----|------|-----|-----|-----|-----|-----|-----|-----|------|-----|------|-----|-----|-----|------|-----|-----|------|------|-----|------|-----|-----|-----|-----|------|-----|-----|
| Short maternal stature         | 2.7 | 2.0 | 0.4 | 1.0  | 1.0 | 1.2 | 1.0 | 1.8  | 1.0 | 2.0 | 1.3 | 1.1 | 1.0 | 1.0 | 0.8 | 1.0  | 0.0 | 10.3 | 0.0 | 2.0 | 0.7 | 1.0  | 0.3 | 3.8 | 7.5  | 0.8  | 0.2 | 1.0  | 6.0 | 1.0 | 2.4 | 1.0 | 1.5  | 1.7 | 5.5 |
| Lack of maternal education     | 0.7 | 1.2 | 0.3 | 0.5  | 3.4 | 1.0 | 1.7 | 1.4  | 0.6 | 0.9 | 1.3 | 1.2 | 7.3 | 0.2 | 2.0 | 1.0  | 1.9 | 0.1  | 1.5 | 2.3 | 0.5 | 17.6 | 1.8 | 0.6 | 1.0  | 1.5  | 1.6 | 1.0  | 1.6 | 1.0 | 0.8 | 4.8 | 0.1  | 0.5 | 1.0 |
| Poorest HH wealth              | 0.5 | 1.3 | 3.4 | 27.1 | 0.5 | 3.6 | 1.2 | 0.4  | 0.2 | 0.5 | 1.7 | 1.1 | 3.8 | 1.6 | 1.8 | 0.3  | 5.1 | 0.7  | 1.4 | 2.8 | 0.8 | 2.2  | 0.5 | 1.3 | 0.7  | 0.8  | 0.7 | 0.2  | 0.9 | 0.2 | 0.7 | 4.0 | 6.7  | 1.1 | 0.2 |
| Low maternal BMI               | 3.8 | 2.5 | 9.7 | 1.3  | 2.4 | 0.9 | 4.7 | 3.6  | 6.3 | 1.7 | 3.3 | 2.4 | 1.6 | 5.3 | 0.9 | 31.0 | 1.7 | 2.9  | 3.8 | 3.7 | 2.4 | 0.2  | 2.8 | 2.8 | 22.1 | 0.8  | 1.3 | 1.0  | 4.3 | 5.4 | 3.8 | 5.2 | 4.7  | 1.1 | 3.8 |
| Poor dietary diversity         | 0.5 | 0.7 | 0.3 | 2.1  | 0.5 | 1.1 | 0.7 | 1.2  | 3.4 | 2.5 | 0.0 | 1.1 | 0.5 | 1.8 | 1.3 | 1.0  | 1.2 | 0.7  | 0.5 | 2.7 | 7.8 | 0.2  | 1.7 | 0.8 | 0.4  | 0.7  | 4.6 | 1.0  | 0.9 | 0.7 | 1.5 | 1.0 | 0.5  | 1.2 | 1.5 |
| No SBA                         | 1.1 | 0.8 | 1.0 | 1.6  | 0.6 | 2.0 | 1.2 | 1.4  | 2.1 | 2.4 | 0.8 | 0.9 | 1.1 | 1.0 | 0.6 | 2.1  | 1.1 | 1.2  | 1.0 | 0.5 | 1.4 | 2.0  | 1.0 | 0.8 | 0.7  | 1.1  | 1.1 | 0.1  | 1.2 | 0.6 | 1.6 | 0.6 | 1.3  | 1.4 | 0.7 |
| Less than four ANC visits      | 0.4 | 0.0 | 0.3 | 0.4  | 0.1 | 0.5 | 1.4 | 16.5 | 5.2 | 4.6 | 0.8 | 0.9 | 1.3 | 0.2 | 0.7 | 1.0  | 0.2 | 1.0  | 2.3 | 4.2 | 1.4 | 1.0  | 0.4 | 1.0 | 0.4  | 2.9  | 1.7 | 1.0  | 2.6 | 2.0 | 0.5 | 1.6 | 0.1  | 0.6 | 0.9 |
| Unimproved sanitation          | 0.9 | 0.8 | 0.9 | 0.8  | 0.9 | 0.7 | 0.9 | 0.8  | 2.9 | 1.2 | 1.6 | 1.1 | 0.7 | 1.0 | 1.5 | 1.0  | 1.1 | 1.1  | 1.2 | 1.1 | 0.9 | 17.5 | 3.3 | 1.2 | 1.1  | 2.1  | 1.1 | 1.0  | 1.8 | 1.0 | 1.2 | 0.5 | 1.3  | 1.3 | 0.9 |
| Had diarrhea, but not used ORT | 2.2 | 1.6 | 1.5 | 1.9  | 0.3 | 0.5 | 2.0 | 0.5  | 1.0 | 2.2 | 1.3 | 0.9 | 1.3 | 1.0 | 1.5 | 1.0  | 0.6 | 0.6  | 1.3 | 0.3 | 0.8 | 1.0  | 1.0 | 0.7 | 1.5  | 0.4  | 0.7 | 1.0  | 1.7 | 2.6 | 0.3 | 0.4 | 0.8  | 0.6 | 1.0 |
| Unsafe stool disposal          | 0.6 | 2.5 | 1.0 | 0.7  | 1.7 | 1.0 | 1.3 | 1.3  | 0.6 | 0.9 | 0.5 | 1.0 | 1.8 | 1.0 | 1.5 | 0.1  | 0.9 | 1.3  | 1.0 | 1.5 | 1.5 | 1.4  | 1.5 | 1.4 | 1.0  | 1.6  | 1.0 | 0.1  | 1.2 | 1.0 | 1.3 | 0.8 | 2.1  | 0.8 | 0.9 |
| High indoor pollution          | 2.5 | 0.5 | 1.0 | 0.5  | 1.2 | 1.0 | 1.3 | 3.0  | 1.0 | 0.9 | 0.5 | 1.0 | 1.0 | 1.1 | 0.5 | 42.1 | 1.0 | 1.1  | 1.4 | 0.5 | 0.9 | 1.3  | 2.3 | 3.0 | 1.3  | 0.8  | 1.0 | 1.0  | 1.0 | 1.3 | 1.4 | 1.1 | 0.2  | 1.2 | 4.9 |
| Not fully vaccinated           | 1.1 | 0.7 | 1.7 | 1.5  | 1.0 | 0.9 | 1.1 | 0.6  | 0.2 | 0.6 | 0.9 | 1.0 | 1.0 | 1.0 | 1.3 | 2.2  | 0.7 | 1.0  | 1.1 | 1.6 | 0.6 | 1.1  | 0.6 | 1.1 | 1.5  | 2.0  | 0.7 | 0.2  | 1.1 | 0.6 | 1.7 | 1.5 | 0.4  | 1.0 | 0.4 |
| Infectious disease             | 1.1 | 0.8 | 1.2 | 1.1  | 2.0 | 1.2 | 0.3 | 0.3  | 0.5 | 0.5 | 1.2 | 1.0 | 0.8 | 0.0 | 0.6 | 1.2  | 0.5 | 2.6  | 0.8 | 1.2 | 0.7 | 0.3  | 2.1 | 0.6 | 0.6  | 1.4  | 1.1 | 2.2  | 0.6 | 0.9 | 1.8 | 0.8 | 0.7  | 1.3 | 2.0 |
| Child marriage                 | 1.1 | 1.1 | 1.9 | 0.8  | 1.2 | 0.8 | 1.0 | 1.1  | 1.1 | 0.7 | 0.5 | 1.0 | 0.9 | 2.8 | 1.1 | 0.5  | 1.0 | 1.4  | 0.8 | 0.7 | 1.1 | 2.3  | 1.0 | 0.8 | 0.9  | 1.7  | 1.1 | 0.2  | 1.2 | 0.9 | 0.8 | 0.9 | 1.2  | 1.1 | 0.9 |
| Delayed breastfeeding          | 0.8 | 0.7 | 1.2 | 2.6  | 0.7 | 1.0 | 1.0 | 1.2  | 0.8 | 0.6 | 1.1 | 0.9 | 0.9 | 0.5 | 0.9 | 0.9  | 0.7 | 0.9  | 1.4 | 1.1 | 1.5 | 1.5  | 1.2 | 0.9 | 1.2  | 1.9  | 0.8 | 12.6 | 1.2 | 1.3 | 1.0 | 1.5 | 1.1  | 0.7 | 0.6 |
| FP need unsatisfied            | 0.9 | 1.3 | 1.2 | 1.5  | 0.7 | 0.8 | 0.7 | 1.0  | 1.1 | 0.8 | 0.9 | 1.0 | 0.9 | 0.7 | 1.2 | 0.0  | 1.3 | 0.8  | 0.9 | 0.6 | 0.6 | 0.2  | 0.6 | 1.1 | 1.1  | 0.8  | 1.4 | 4.0  | 0.8 | 0.9 | 1.0 | 0.6 | 0.5  | 1.1 | 0.4 |
| No vit A supplement            | 1.0 | 1.4 | 1.2 | 1.3  | 1.3 | 0.9 | 0.8 | 1.5  | 0.9 | 2.2 | 2.2 | 1.1 | 1.1 | 4.2 | 1.3 | 0.5  | 1.1 | 0.5  | 0.8 | 1.6 | 0.4 | 1.0  | 3.4 | 1.3 | 0.6  | 7.3  | 1.1 | 0.2  | 0.9 | 0.5 | 0.7 | 1.4 | 0.8  | 1.3 | 0.6 |
| No iodized salt                | 1.1 | 0.7 | 1.5 | 2.4  | 1.3 | 0.6 | 1.2 | 1.1  | 0.9 | 1.3 | 0.4 | 1.0 | 0.5 | 0.6 | 0.3 | 0.2  | 0.0 | 3.4  | 0.9 | 1.0 | 0.7 | 0.6  | 1.1 | 0.9 | 0.7  | 12.0 | 0.6 | 1.0  | 0.6 | 0.9 | 1.4 | 0.6 | 11.5 | 1.5 | 0.8 |
| Unsafe water                   | 1.2 | 0.8 | 1.3 | 0.8  | 1.5 | 0.9 | 1.0 | 1.7  | 0.9 | 0.9 | 0.7 | 1.1 | 0.9 | 0.3 | 0.8 | 3.7  | 0.6 | 1.2  | 0.6 | 0.6 | 1.1 | 1.2  | 1.0 | 0.9 | 2.4  | 0.8  | 1.3 | 0.7  | 0.8 | 1.1 | 1.4 | 1.2 | 0.5  | 1.1 | 0.8 |
| No care seeking for susp pneu  | 2.5 | 1.5 | 1.5 | 1.0  | 1.1 | 0.9 | 1.0 | 3.2  | 4.2 | 1.0 | 0.5 | 0.9 | 1.0 | 1.0 | 1.4 | 0.4  | 1.8 | 0.7  | 1.2 | 0.6 | 1.6 | 1.5  | 1.4 | 1.3 | 1.0  | 1.0  | 1.6 | 0.3  | 1.0 | 1.0 | 1.0 | 0.8 | 1.4  | 1.0 | 1.2 |

Label: odds ratios

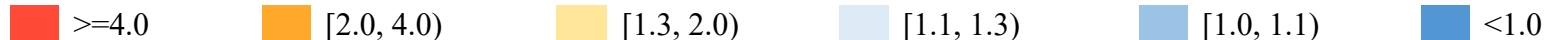



**eFigure 13. Relative Ranking of 20 Factors Associated With Child Anthropometric Failures From Fully Adjusted Models for Pooled Sample, Stratified by Place of Residence**

**A) stunting, B) underweight, and C) wasting, odds ratio (OR) and 95% confidence interval (CI)**

**A) Stunting**

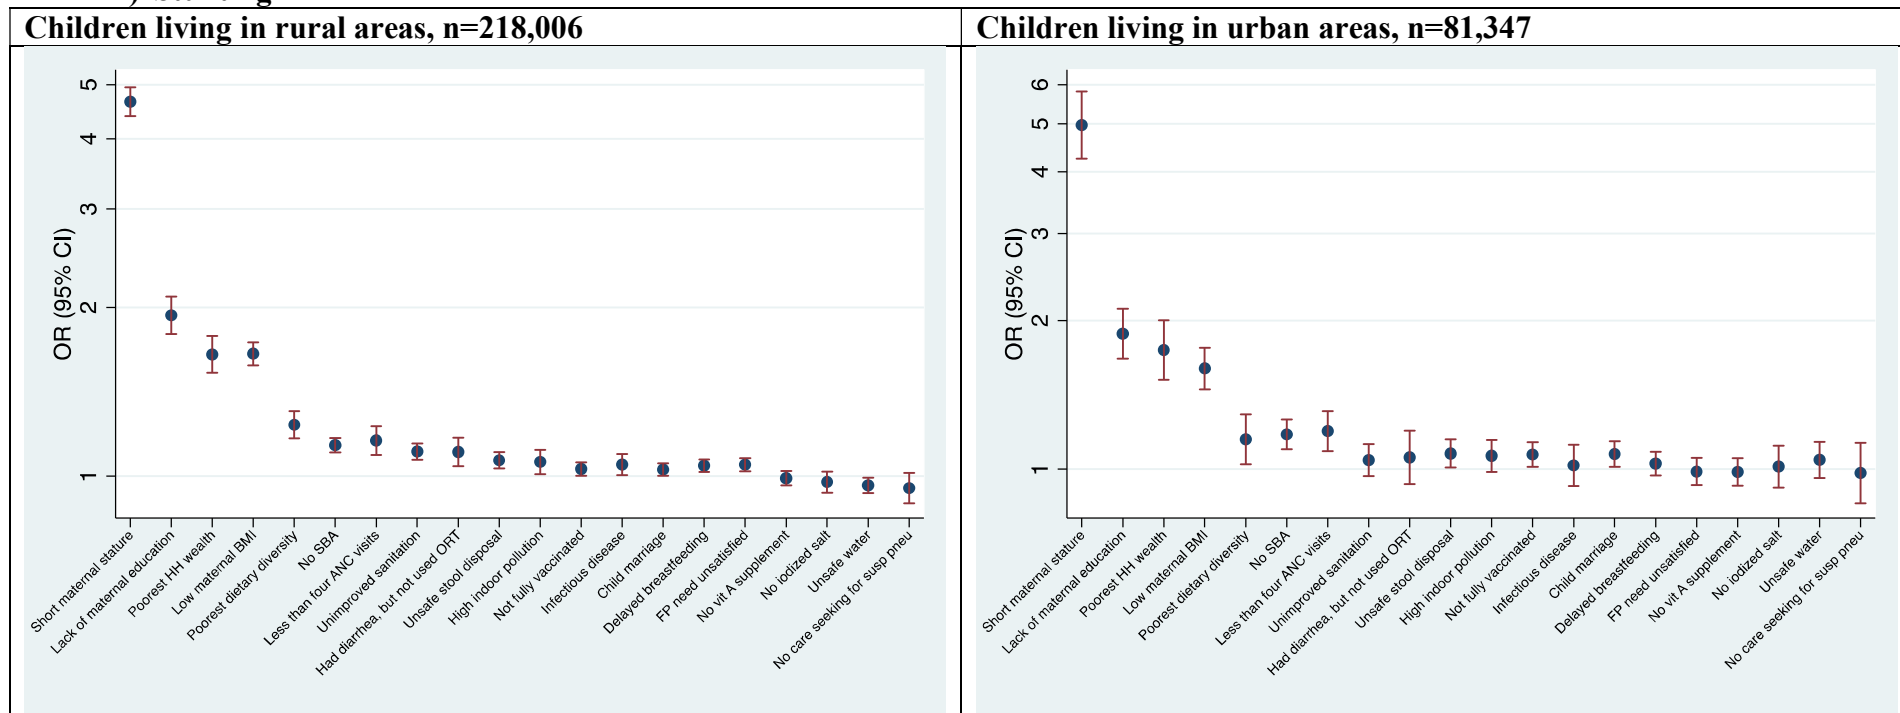

**Note:**

1. We use logarithmic scale for the y axis.
2. Short maternal stature: maternal height <145cm; low maternal BMI: maternal BMI <18.5 kg/m<sup>2</sup>; child marriage: mother's age at marriage <18 years old; delayed breastfeeding: child was not initially breastfed within one hour after born; infectious disease: child was caught by infectious diseases two weeks prior to the survey.
3. Abbreviations - HH: household, BMI: body mass index; SBA: skilled birth attendant; ANC: antenatal care; ORT: oral rehydration therapy; FP: family planning; vit: vitamin; susp pneu: suspected pneumonia.

**B) Underweight**

**Children living in rural areas, n=218,006**

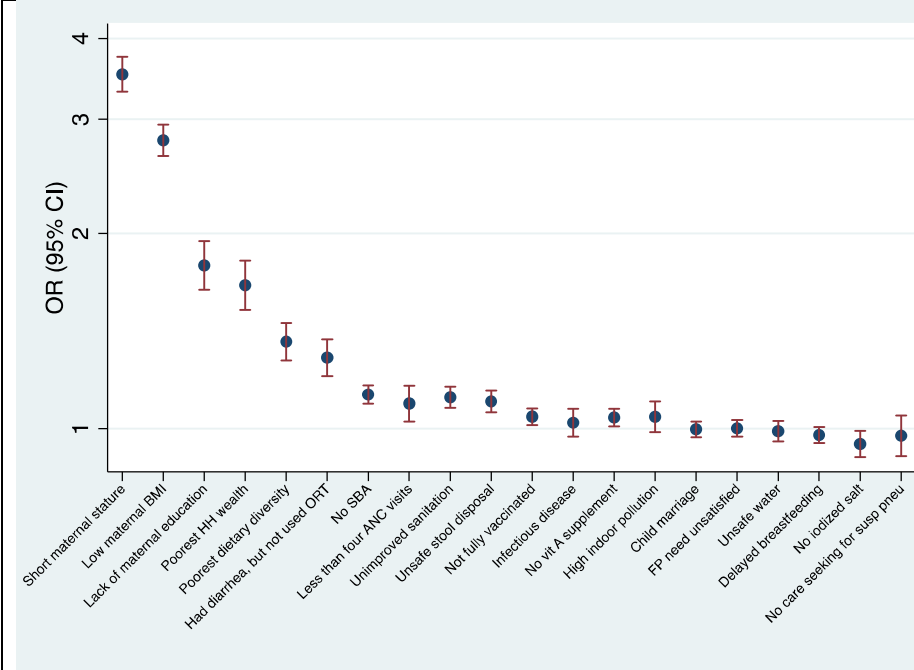

**Children living in urban areas, n=81,347**

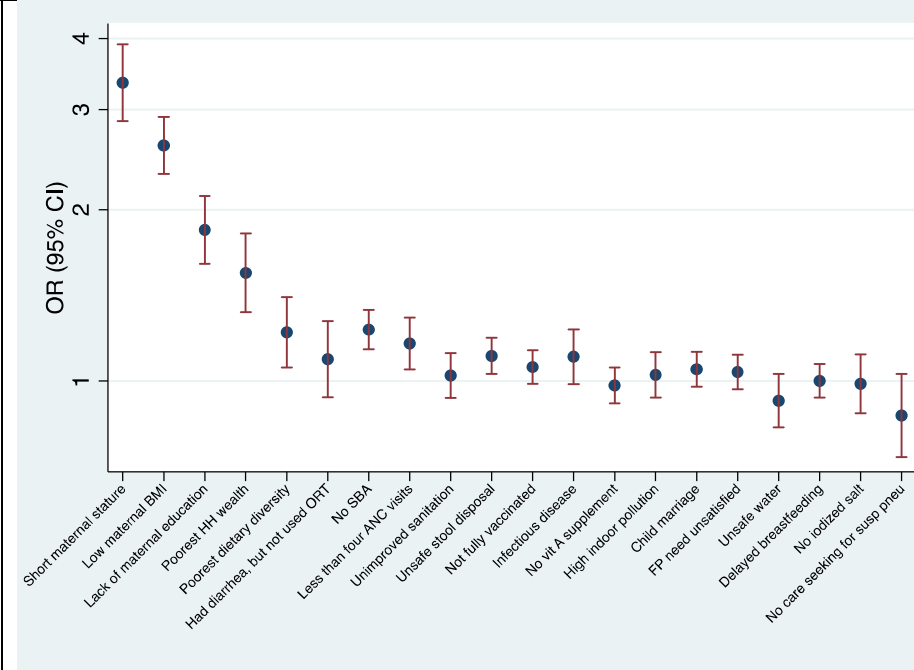

### C) Wasting

Children living in rural areas, n=218,006

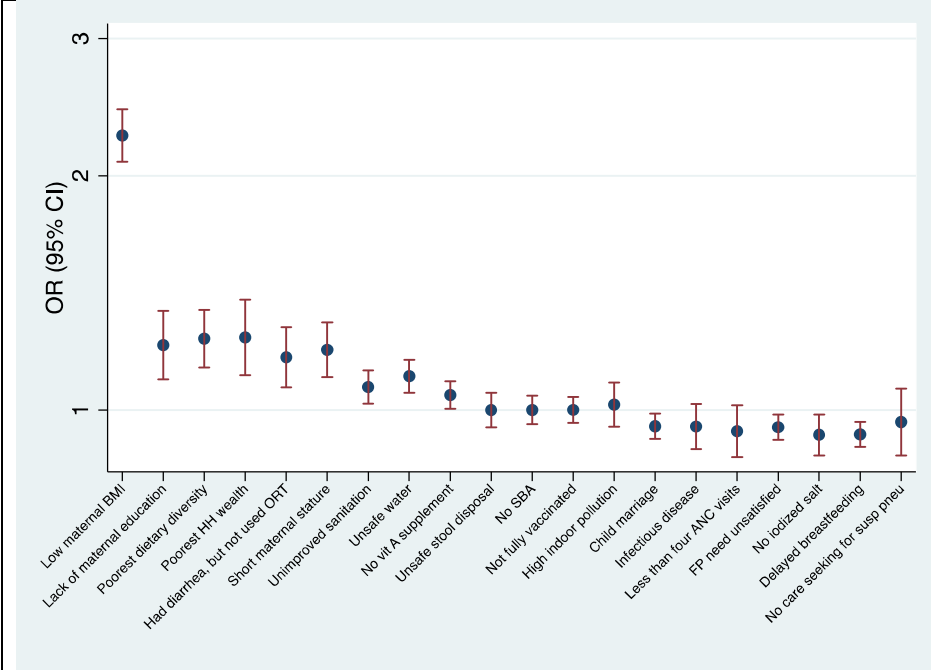

Children living in urban areas, n=81,347

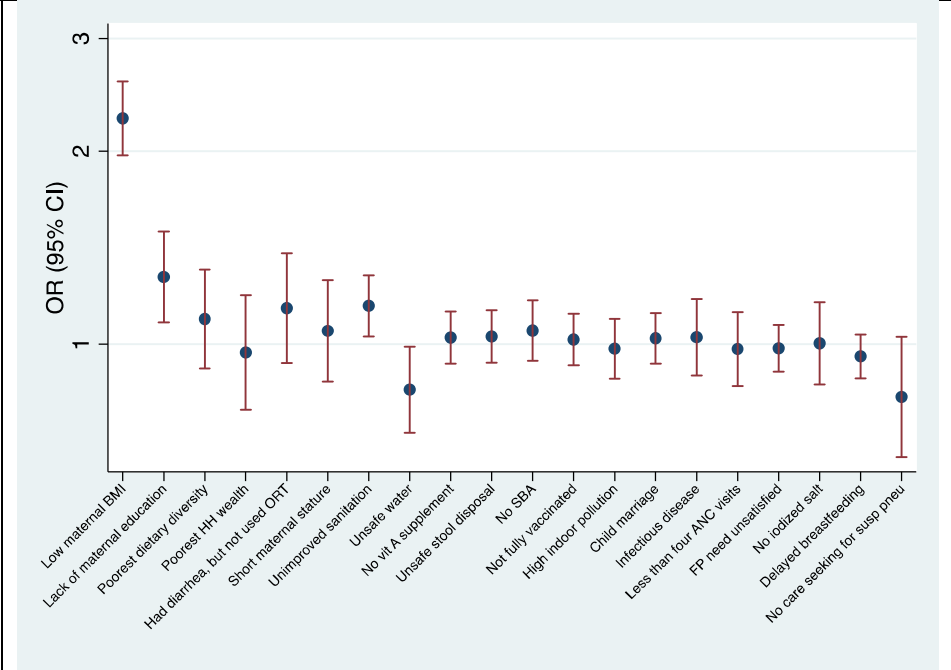

**eFigure 14. Country-Specific Ranking of 20 Factors Associated With Child Anthropometric Failures From Fully Adjusted Models, Stratified by Place of Residence**  
**A) stunting among children living in rural areas, B) stunting among children living in urban areas, C) underweight among children living in rural areas, D) underweight among children living in urban areas, E) wasting among children living in rural areas, and F) wasting among children living in urban areas**

**A) Stunting, children living in rural areas, total n=218,006**

|                                | BJ | BF | BI | CM | CI | CD | ET | GM | GH | GN | HT | IN | KE | KG | KM | LS | LR | MW | ML | MZ | MM | NA | NP | NE | PE | ST | SL | SZ | TD | TJ | TZ | TG | UG | ZM | ZW |
|--------------------------------|----|----|----|----|----|----|----|----|----|----|----|----|----|----|----|----|----|----|----|----|----|----|----|----|----|----|----|----|----|----|----|----|----|----|----|
| Short maternal stature         | 1  | 1  | 1  | 2  | 5  | 2  | 1  | 3  | 1  | 20 | 1  | 1  | 1  | 1  | 7  | 3  | 2  | 1  | 7  | 1  | 1  | 2  | 1  | 8  | 1  | 1  | 1  | 3  | 8  | 1  | 1  | 2  | 1  | 1  | 1  |
| Lack of maternal education     | 5  | 2  | 3  | 7  | 3  | 1  | 4  | 4  | 2  | 7  | 8  | 2  | 8  | 17 | 1  | 6  | 9  | 2  | 1  | 14 | 5  | 17 | 19 | 5  | 2  | 15 | 7  | 14 | 20 | 7  | 2  | 6  | 3  | 2  | 2  |
| Poorest HH wealth              | 4  | 3  | 2  | 1  | 4  | 3  | 3  | 12 | 18 | 1  | 2  | 4  | 2  | 12 | 3  | 1  | 1  | 4  | 2  | 3  | 7  | 6  | 2  | 11 | 3  | 2  | 2  | 1  | 18 | 19 | 3  | 4  | 4  | 4  | 20 |
| Low maternal BMI               | 6  | 4  | 4  | 4  | 2  | 4  | 6  | 9  | 5  | 19 | 4  | 3  | 4  | 2  | 2  | 4  | 3  | 3  | 4  | 4  | 2  | 8  | 6  | 1  | 20 | 8  | 4  | 2  | 2  | 3  | 4  | 3  | 6  | 3  | 3  |
| Poor dietary diversity         | 17 | 5  | 17 | 3  | 6  | 8  | 2  | 20 | 11 | 3  | 9  | 5  | 18 | 11 | 18 | 13 | 4  | 10 | 3  | 5  | 20 | 11 | 18 | 2  | 5  | 3  | 6  | 19 | 3  | 2  | 7  | 9  | 5  | 9  | 17 |
| No SBA                         | 8  | 6  | 5  | 12 | 19 | 14 | 11 | 10 | 3  | 12 | 12 | 10 | 5  | 3  | 9  | 8  | 10 | 11 | 12 | 9  | 3  | 12 | 14 | 13 | 4  | 13 | 13 | 5  | 4  | 8  | 6  | 17 | 10 | 12 | 10 |
| Less than four ANC visits      | 2  | 20 | 20 | 6  | 20 | 20 | 19 | 2  | 10 | 2  | 10 | 6  | 7  | 19 | 15 | 5  | 17 | 20 | 5  | 2  | 6  | 4  | 4  | 3  | 19 | 20 | 14 | 16 | 5  | 6  | 20 | 1  | 2  | 5  | 5  |
| Unimproved sanitation          | 16 | 15 | 9  | 18 | 13 | 16 | 10 | 7  | 14 | 8  | 6  | 7  | 10 | 16 | 16 | 16 | 8  | 14 | 17 | 6  | 16 | 20 | 3  | 10 | 7  | 18 | 16 | 17 | 13 | 14 | 13 | 13 | 14 | 18 | 7  |
| Had diarrhea, but not used ORT | 7  | 10 | 12 | 9  | 18 | 9  | 5  | 17 | 15 | 14 | 5  | 8  | 16 | 20 | 4  | 2  | 18 | 7  | 8  | 10 | 19 | 7  | 8  | 18 | 16 | 10 | 19 | 4  | 6  | 5  | 5  | 10 | 13 | 19 | 19 |
| Unsafe stool disposal          | 13 | 8  | 6  | 8  | 11 | 7  | 18 | 8  | 4  | 10 | 16 | 9  | 17 | 7  | 19 | 9  | 12 | 12 | 6  | 20 | 8  | 14 | 5  | 7  | 17 | 9  | 17 | 15 | 9  | 4  | 8  | 7  | 7  | 14 | 13 |
| High indoor pollution          | 3  | 19 | 13 | 20 | 1  | 15 | 20 | 6  | 17 | 5  | 3  | 13 | 3  | 8  | 20 | 19 | 11 | 5  | 20 | 11 | 14 | 1  | 12 | 20 | 8  | 6  | 20 | 20 | 1  | 9  | 19 | 16 | 11 | 6  | 4  |
| Not fully vaccinated           | 12 | 11 | 7  | 13 | 9  | 19 | 14 | 5  | 6  | 9  | 15 | 16 | 12 | 5  | 6  | 14 | 14 | 18 | 19 | 16 | 17 | 3  | 10 | 14 | 13 | 4  | 12 | 6  | 10 | 17 | 17 | 5  | 17 | 8  | 9  |
| Infectious disease             | 10 | 9  | 11 | 17 | 15 | 18 | 9  | 16 | 7  | 4  | 14 | 11 | 19 | 9  | 12 | 20 | 6  | 19 | 18 | 7  | 13 | 13 | 11 | 6  | 11 | 5  | 18 | 18 | 7  | 18 | 16 | 18 | 19 | 7  | 6  |
| Child marriage                 | 11 | 16 | 10 | 19 | 10 | 11 | 16 | 18 | 9  | 18 | 19 | 12 | 11 | 14 | 10 | 12 | 13 | 16 | 15 | 17 | 9  | 19 | 17 | 12 | 14 | 11 | 11 | 10 | 15 | 16 | 18 | 8  | 15 | 10 | 11 |
| Delayed breastfeeding          | 14 | 13 | 15 | 16 | 16 | 12 | 7  | 14 | 13 | 17 | 7  | 14 | 6  | 4  | 14 | 11 | 5  | 6  | 16 | 13 | 15 | 16 | 15 | 9  | 9  | 19 | 5  | 13 | 19 | 13 | 15 | 11 | 16 | 15 | 14 |
| FP need unsatisfied            | 9  | 12 | 14 | 10 | 14 | 17 | 8  | 11 | 16 | 13 | 13 | 15 | 14 | 6  | 5  | 18 | 7  | 9  | 13 | 15 | 12 | 9  | 13 | 16 | 10 | 17 | 8  | 9  | 11 | 10 | 11 | 14 | 9  | 13 | 8  |
| No vit A supplement            | 19 | 18 | 8  | 15 | 7  | 5  | 17 | 1  | 8  | 6  | 20 | 17 | 20 | 13 | 17 | 17 | 15 | 15 | 9  | 18 | 11 | 10 | 7  | 4  | 6  | 7  | 10 | 8  | 17 | 20 | 14 | 12 | 12 | 17 | 16 |
| No iodized salt                | 18 | 17 | 19 | 5  | 8  | 10 | 15 | 15 | 12 | 11 | 17 | 19 | 13 | 15 | 8  | 10 | 16 | 17 | 14 | 12 | 10 | 18 | 20 | 15 | 15 | 16 | 3  | 12 | 12 | 15 | 10 | 15 | 20 | 20 | 12 |
| Unsafe water                   | 15 | 14 | 18 | 11 | 17 | 13 | 13 | 19 | 19 | 16 | 18 | 20 | 9  | 10 | 13 | 15 | 19 | 13 | 11 | 8  | 4  | 15 | 9  | 17 | 18 | 12 | 9  | 11 | 16 | 12 | 9  | 20 | 8  | 11 | 15 |
| No care seeking for susp pneu  | 20 | 7  | 16 | 14 | 12 | 6  | 12 | 13 | 20 | 15 | 11 | 18 | 15 | 18 | 11 | 7  | 20 | 8  | 10 | 19 | 18 | 5  | 16 | 19 | 12 | 14 | 15 | 7  | 14 | 11 | 12 | 19 | 18 | 16 | 18 |

**Label:**  
■ Rank 1<sup>st</sup>    ■ Rank 2<sup>nd</sup>    ■ Rank 3<sup>rd</sup>-4<sup>th</sup>    ■ Rank 5<sup>th</sup>-7<sup>th</sup>    ■ Rank 8<sup>th</sup>-12<sup>nd</sup>    ■ Rank 13<sup>th</sup>-20<sup>th</sup>

- Note:**
1. BJ= Benin, BF= Burkina Faso, BI= Burundi, CM=Cameroon, CI=Côte d'Ivoire, CD=The Democratic Republic of the Congo, ET=Ethiopia, GM=Gambia, GH=Ghana, GN=Guinea, HT=Haiti, IN=India, KE=Kenya, KG=Kyrgyzstan, KM=Comoros, LS=Lesotho, LR=Liberia, MW=Malawi, ML=Mali, MZ=Mozambique, MM=Myanmar, NA=Namibia, NP=Nepal, NE=Niger, PE=Peru, ST= São Tomé and Príncipe, SL=Sierra Leone, SZ=Swaziland, TD=Chad, TJ=Tajikistan, TZ=Tanzania, TG=Togo, UG=Uganda, ZM=Zambia, ZW=Zimbabwe.
  2. Short maternal stature: maternal height <145cm; low maternal BMI: maternal BMI <18.5 kg/m<sup>2</sup>; child marriage: mother's age at marriage <18 years old; delayed breastfeeding: child was not initially breastfed within one hour after born; infectious disease: child was caught by infectious diseases two weeks prior to the survey.
  3. Abbreviations - HH: household, BMI: body mass index; SBA: skilled birth attendant; ANC: antenatal care; ORT: oral rehydration therapy; FP: family planning; vit: vitamin; susp pneu: suspected pneumonia.

**B) Stunting, children living in urban areas, total n=81,347**

|                                | BJ | BF | BI | CM | CI | CD | ET | GM | GH | GN | HT | IN | KE | KG | KM | LS | LR | MW | ML | MZ | MM | NA | NP | NE | PE | ST | SL | SZ | TD | TJ | TZ | TG | UG | ZM | ZW |
|--------------------------------|----|----|----|----|----|----|----|----|----|----|----|----|----|----|----|----|----|----|----|----|----|----|----|----|----|----|----|----|----|----|----|----|----|----|----|
| Short maternal stature         | 1  | 14 | 1  | 16 | 2  | 1  | 18 | 8  | 1  | 18 | 15 | 1  | 20 | 2  | 17 | 18 | 2  | 1  | 20 | 1  | 1  | 2  | 1  | 10 | 1  | 8  | 11 | 17 | 1  | 1  | 1  | 14 | 2  | 1  | 2  |
| Lack of maternal education     | 5  | 2  | 2  | 1  | 1  | 4  | 6  | 15 | 2  | 1  | 6  | 2  | 13 | 10 | 1  | 9  | 1  | 7  | 1  | 4  | 20 | 4  | 2  | 1  | 4  | 7  | 1  | 2  | 2  | 19 | 6  | 6  | 3  | 3  | 1  |
| Poorest HH wealth              | 3  | 4  | 4  | 15 | 15 | 3  | 2  | 4  | 17 | 7  | 1  | 4  | 1  | 20 | 6  | 10 | 6  | 8  | 6  | 2  | 18 | 17 | 3  | 19 | 2  | 1  | 14 | 14 | 6  | 17 | 3  | 3  | 8  | 5  | 13 |
| Low maternal BMI               | 4  | 3  | 6  | 4  | 4  | 6  | 1  | 14 | 11 | 9  | 2  | 3  | 8  | 1  | 2  | 11 | 3  | 4  | 11 | 3  | 3  | 1  | 4  | 4  | 3  | 2  | 2  | 13 | 3  | 7  | 5  | 1  | 5  | 2  | 3  |
| Poor dietary diversity         | 20 | 5  | 3  | 8  | 20 | 5  | 12 | 5  | 15 | 6  | 17 | 7  | 2  | 4  | 20 | 7  | 10 | 19 | 2  | 6  | 10 | 19 | 18 | 7  | 17 | 14 | 20 | 20 | 7  | 4  | 2  | 2  | 14 | 16 | 4  |
| No SBA                         | 9  | 9  | 13 | 10 | 13 | 17 | 11 | 6  | 3  | 3  | 12 | 8  | 4  | 13 | 19 | 5  | 17 | 6  | 4  | 10 | 6  | 13 | 11 | 11 | 5  | 12 | 16 | 19 | 10 | 6  | 16 | 7  | 10 | 10 | 6  |
| Less than four ANC visits      | 2  | 1  | 19 | 3  | 3  | 20 | 8  | 18 | 4  | 8  | 4  | 5  | 7  | 12 | 3  | 4  | 9  | 20 | 10 | 9  | 12 | 20 | 15 | 2  | 7  | 15 | 4  | 8  | 4  | 12 | 12 | 8  | 4  | 20 | 14 |
| Unimproved sanitation          | 12 | 13 | 12 | 19 | 6  | 18 | 5  | 3  | 18 | 11 | 8  | 18 | 3  | 3  | 5  | 20 | 14 | 14 | 18 | 16 | 5  | 5  | 5  | 16 | 9  | 20 | 5  | 15 | 20 | 8  | 9  | 19 | 11 | 6  | 17 |
| Had diarrhea, but not used ORT | 14 | 12 | 15 | 13 | 11 | 16 | 20 | 17 | 20 | 2  | 20 | 11 | 5  | 14 | 7  | 1  | 4  | 2  | 5  | 15 | 13 | 3  | 20 | 14 | 12 | 13 | 18 | 16 | 11 | 5  | 13 | 20 | 15 | 4  | 16 |
| Unsafe stool disposal          | 16 | 7  | 16 | 18 | 9  | 15 | 15 | 7  | 14 | 10 | 3  | 9  | 17 | 15 | 13 | 16 | 11 | 5  | 17 | 7  | 9  | 11 | 8  | 3  | 8  | 3  | 3  | 18 | 8  | 13 | 17 | 10 | 7  | 15 | 18 |
| High indoor pollution          | 6  | 15 | 11 | 6  | 7  | 2  | 7  | 20 | 9  | 19 | 10 | 12 | 14 | 8  | 11 | 19 | 13 | 11 | 19 | 5  | 14 | 6  | 10 | 9  | 16 | 18 | 19 | 7  | 5  | 3  | 8  | 4  | 19 | 7  | 7  |
| Not fully vaccinated           | 13 | 8  | 14 | 12 | 14 | 13 | 17 | 11 | 5  | 17 | 13 | 10 | 15 | 16 | 4  | 15 | 7  | 3  | 3  | 12 | 4  | 9  | 16 | 6  | 11 | 6  | 8  | 12 | 19 | 20 | 7  | 11 | 13 | 18 | 12 |
| Infectious disease             | 18 | 16 | 9  | 7  | 16 | 8  | 9  | 16 | 10 | 14 | 16 | 16 | 11 | 6  | 8  | 17 | 18 | 18 | 14 | 13 | 15 | 7  | 7  | 8  | 19 | 4  | 7  | 10 | 18 | 10 | 15 | 5  | 6  | 17 | 11 |
| Child marriage                 | 11 | 17 | 10 | 9  | 18 | 7  | 14 | 2  | 6  | 16 | 9  | 14 | 6  | 7  | 9  | 8  | 19 | 12 | 12 | 8  | 2  | 10 | 6  | 5  | 13 | 9  | 15 | 11 | 15 | 14 | 18 | 17 | 16 | 8  | 10 |
| Delayed breastfeeding          | 10 | 18 | 7  | 20 | 19 | 10 | 10 | 10 | 19 | 20 | 18 | 13 | 12 | 19 | 12 | 3  | 8  | 17 | 7  | 19 | 8  | 8  | 14 | 18 | 20 | 5  | 13 | 5  | 13 | 16 | 14 | 15 | 9  | 13 | 8  |
| FP need unsatisfied            | 7  | 10 | 20 | 11 | 12 | 12 | 4  | 1  | 13 | 15 | 7  | 20 | 19 | 9  | 18 | 12 | 16 | 9  | 15 | 14 | 11 | 12 | 13 | 13 | 10 | 16 | 6  | 9  | 9  | 18 | 20 | 12 | 18 | 11 | 20 |
| No vit A supplement            | 15 | 11 | 17 | 5  | 10 | 9  | 19 | 19 | 8  | 4  | 14 | 17 | 16 | 11 | 10 | 13 | 5  | 10 | 13 | 20 | 7  | 15 | 12 | 12 | 6  | 11 | 9  | 6  | 17 | 9  | 19 | 13 | 17 | 19 | 9  |
| No iodized salt                | 17 | 6  | 18 | 17 | 8  | 19 | 3  | 13 | 7  | 12 | 11 | 6  | 18 | 18 | 14 | 6  | 20 | 13 | 16 | 18 | 19 | 14 | 17 | 17 | 15 | 17 | 12 | 1  | 14 | 15 | 4  | 18 | 1  | 9  | 19 |
| Unsafe water                   | 19 | 19 | 5  | 2  | 17 | 14 | 16 | 9  | 12 | 5  | 19 | 15 | 9  | 5  | 15 | 2  | 12 | 15 | 9  | 17 | 17 | 16 | 9  | 15 | 18 | 19 | 10 | 4  | 16 | 2  | 10 | 9  | 12 | 12 | 15 |
| No care seeking for susp pneu  | 8  | 20 | 8  | 14 | 5  | 11 | 13 | 12 | 16 | 13 | 5  | 19 | 10 | 17 | 16 | 14 | 15 | 16 | 8  | 11 | 16 | 18 | 19 | 20 | 14 | 10 | 17 | 3  | 12 | 11 | 11 | 16 | 20 | 14 | 5  |

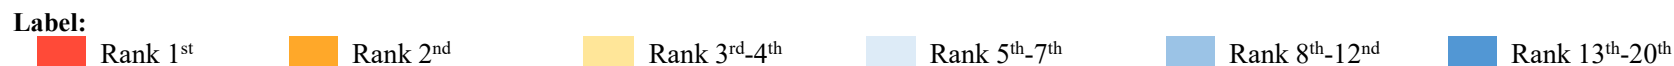

**C) Underweight, children living in rural areas, total n=218,006**

|                                | BJ | BF | BI | CM | CI | CD | ET | GM | GH | GN | HT | IN | KE | KG | KM | LS | LR | MW | ML | MZ | MM | NA | NP | NE | PE | ST | SL | SZ | TD | TJ | TZ | TG | UG | ZM | ZW |
|--------------------------------|----|----|----|----|----|----|----|----|----|----|----|----|----|----|----|----|----|----|----|----|----|----|----|----|----|----|----|----|----|----|----|----|----|----|----|
| Short maternal stature         | 1  | 1  | 2  | 6  | 4  | 1  | 2  | 1  | 2  | 2  | 1  | 1  | 1  | 14 | 3  | 2  | 2  | 1  | 7  | 2  | 1  | 14 | 2  | 7  | 2  | 4  | 1  | 1  | 10 | 3  | 1  | 1  | 2  | 1  | 2  |
| Lack of maternal education     | 11 | 4  | 19 | 5  | 3  | 3  | 1  | 20 | 5  | 7  | 3  | 3  | 4  | 20 | 6  | 3  | 12 | 20 | 4  | 7  | 19 | 16 | 7  | 3  | 3  | 19 | 6  | 6  | 2  | 18 | 5  | 3  | 1  | 8  | 15 |
| Poorest HH wealth              | 8  | 3  | 3  | 4  | 6  | 2  | 4  | 13 | 20 | 20 | 16 | 4  | 2  | 4  | 2  | 5  | 18 | 3  | 2  | 3  | 11 | 4  | 5  | 9  | 1  | 5  | 17 | 4  | 15 | 1  | 3  | 19 | 3  | 4  | 20 |
| Low maternal BMI               | 2  | 2  | 1  | 2  | 1  | 5  | 5  | 3  | 1  | 1  | 2  | 2  | 3  | 1  | 1  | 4  | 1  | 2  | 1  | 1  | 2  | 5  | 1  | 1  | 4  | 1  | 2  | 2  | 1  | 2  | 2  | 2  | 4  | 2  | 1  |
| Poor dietary diversity         | 15 | 16 | 16 | 3  | 13 | 6  | 3  | 14 | 6  | 8  | 7  | 5  | 19 | 6  | 9  | 15 | 3  | 4  | 3  | 5  | 6  | 15 | 8  | 6  | 20 | 8  | 5  | 17 | 7  | 5  | 15 | 18 | 5  | 18 | 19 |
| No SBA                         | 4  | 5  | 5  | 8  | 18 | 10 | 11 | 7  | 4  | 3  | 17 | 10 | 6  | 13 | 13 | 8  | 5  | 8  | 8  | 19 | 4  | 8  | 15 | 16 | 14 | 10 | 14 | 8  | 6  | 8  | 7  | 9  | 9  | 5  | 9  |
| Less than four ANC visits      | 10 | 20 | 17 | 1  | 16 | 20 | 6  | 2  | 16 | 4  | 14 | 9  | 7  | 15 | 18 | 11 | 19 | 19 | 19 | 20 | 3  | 9  | 6  | 13 | 19 | 3  | 4  | 20 | 4  | 6  | 20 | 16 | 10 | 3  | 4  |
| Unimproved sanitation          | 19 | 7  | 12 | 18 | 7  | 11 | 8  | 11 | 10 | 19 | 4  | 7  | 15 | 3  | 17 | 10 | 4  | 18 | 10 | 14 | 15 | 20 | 4  | 14 | 6  | 12 | 8  | 18 | 9  | 7  | 18 | 6  | 19 | 7  | 7  |
| Had diarrhea, but not used ORT | 5  | 11 | 6  | 7  | 5  | 7  | 7  | 4  | 19 | 9  | 5  | 6  | 9  | 12 | 5  | 1  | 11 | 10 | 6  | 4  | 20 | 12 | 10 | 10 | 12 | 2  | 18 | 3  | 5  | 4  | 10 | 5  | 11 | 15 | 17 |
| Unsafe stool disposal          | 16 | 9  | 9  | 11 | 9  | 9  | 10 | 8  | 8  | 10 | 18 | 8  | 13 | 5  | 11 | 9  | 9  | 5  | 9  | 12 | 5  | 3  | 20 | 4  | 10 | 9  | 20 | 9  | 8  | 9  | 6  | 4  | 7  | 17 | 16 |
| High indoor pollution          | 3  | 19 | 20 | 20 | 10 | 16 | 20 | 18 | 3  | 14 | 13 | 12 | 5  | 7  | 4  | 20 | 13 | 14 | 20 | 13 | 10 | 1  | 3  | 2  | 17 | 18 | 15 | 19 | 20 | 13 | 19 | 15 | 14 | 20 | 3  |
| Not fully vaccinated           | 9  | 10 | 7  | 13 | 17 | 17 | 16 | 9  | 9  | 12 | 6  | 15 | 14 | 8  | 8  | 17 | 8  | 7  | 14 | 9  | 14 | 10 | 12 | 15 | 9  | 6  | 9  | 7  | 3  | 16 | 8  | 7  | 15 | 6  | 12 |
| Infectious disease             | 7  | 6  | 18 | 16 | 15 | 15 | 15 | 19 | 12 | 11 | 15 | 13 | 10 | 2  | 16 | 19 | 10 | 13 | 12 | 11 | 7  | 19 | 14 | 5  | 15 | 20 | 19 | 12 | 12 | 20 | 11 | 17 | 20 | 9  | 11 |
| Child marriage                 | 14 | 15 | 13 | 19 | 11 | 13 | 17 | 16 | 18 | 18 | 19 | 14 | 18 | 16 | 14 | 7  | 14 | 11 | 15 | 16 | 9  | 18 | 19 | 12 | 11 | 17 | 16 | 11 | 18 | 11 | 17 | 10 | 17 | 10 | 8  |
| Delayed breastfeeding          | 17 | 17 | 11 | 12 | 20 | 18 | 12 | 17 | 14 | 17 | 11 | 17 | 16 | 17 | 12 | 12 | 6  | 6  | 11 | 17 | 13 | 13 | 17 | 11 | 8  | 11 | 11 | 14 | 17 | 14 | 16 | 11 | 8  | 11 | 13 |
| FP need unsatisfied            | 6  | 8  | 15 | 9  | 14 | 19 | 14 | 12 | 13 | 13 | 12 | 18 | 11 | 10 | 7  | 18 | 7  | 15 | 13 | 15 | 16 | 7  | 18 | 19 | 16 | 13 | 10 | 5  | 14 | 15 | 4  | 8  | 16 | 12 | 10 |
| No vit A supplement            | 12 | 18 | 10 | 14 | 8  | 12 | 19 | 5  | 11 | 5  | 10 | 11 | 17 | 9  | 15 | 16 | 15 | 17 | 17 | 10 | 12 | 6  | 13 | 8  | 7  | 7  | 13 | 16 | 16 | 19 | 13 | 14 | 6  | 16 | 18 |
| No iodized salt                | 20 | 14 | 4  | 10 | 2  | 4  | 9  | 15 | 7  | 6  | 9  | 19 | 20 | 11 | 20 | 14 | 20 | 12 | 16 | 18 | 17 | 17 | 9  | 17 | 5  | 15 | 12 | 13 | 13 | 10 | 9  | 13 | 13 | 19 | 5  |
| Unsafe water                   | 18 | 12 | 14 | 17 | 19 | 14 | 18 | 10 | 15 | 16 | 20 | 16 | 8  | 18 | 10 | 13 | 16 | 9  | 18 | 8  | 8  | 11 | 11 | 18 | 18 | 16 | 3  | 10 | 19 | 17 | 12 | 12 | 12 | 13 | 14 |
| No care seeking for susp pneu  | 13 | 13 | 8  | 15 | 12 | 8  | 13 | 6  | 17 | 15 | 8  | 20 | 12 | 19 | 19 | 6  | 17 | 16 | 5  | 6  | 18 | 2  | 16 | 20 | 13 | 14 | 7  | 15 | 11 | 12 | 14 | 20 | 18 | 14 | 6  |

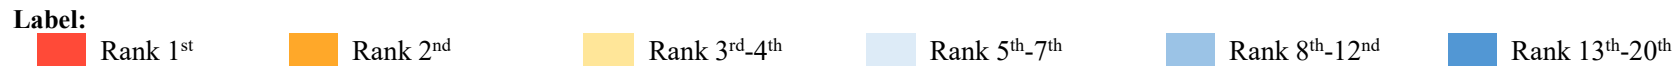

**D) Underweight, children living in urban areas, total n=81,347**

|                                | BJ | BF | BI | CM | CI | CD | ET | GM | GH | GN | HT | IN | KE | KG | KM | LS | LR | MW | ML | MZ | MM | NA | NP | NE | PE | ST | SL | SZ | TD | TJ | TZ | TG | UG | ZM | ZW |
|--------------------------------|----|----|----|----|----|----|----|----|----|----|----|----|----|----|----|----|----|----|----|----|----|----|----|----|----|----|----|----|----|----|----|----|----|----|----|
| Short maternal stature         | 2  | 13 | 1  | 13 | 1  | 17 | 20 | 10 | 10 | 15 | 1  | 1  | 20 | 12 | 19 | 9  | 1  | 10 | 20 | 2  | 2  | 14 | 2  | 1  | 3  | 3  | 9  | 14 | 2  | 11 | 7  | 3  | 2  | 1  | 13 |
| Lack of maternal education     | 3  | 7  | 19 | 3  | 9  | 5  | 7  | 8  | 1  | 9  | 14 | 3  | 13 | 4  | 1  | 14 | 17 | 16 | 1  | 4  | 19 | 7  | 16 | 6  | 5  | 8  | 12 | 8  | 5  | 13 | 4  | 7  | 1  | 5  | 10 |
| Poorest HH wealth              | 4  | 5  | 5  | 15 | 10 | 2  | 10 | 19 | 4  | 2  | 18 | 4  | 2  | 9  | 20 | 12 | 12 | 13 | 18 | 11 | 18 | 12 | 12 | 20 | 2  | 1  | 17 | 15 | 3  | 20 | 6  | 4  | 4  | 2  | 11 |
| Low maternal BMI               | 1  | 1  | 2  | 1  | 2  | 1  | 1  | 1  | 6  | 10 | 2  | 2  | 1  | 1  | 2  | 10 | 2  | 1  | 3  | 1  | 1  | 2  | 1  | 3  | 1  | 2  | 4  | 7  | 1  | 4  | 2  | 1  | 5  | 3  | 1  |
| Poor dietary diversity         | 5  | 3  | 4  | 2  | 13 | 13 | 15 | 2  | 15 | 3  | 20 | 5  | 6  | 3  | 18 | 13 | 3  | 19 | 19 | 5  | 14 | 5  | 18 | 14 | 19 | 18 | 20 | 9  | 4  | 5  | 5  | 8  | 20 | 18 | 19 |
| No SBA                         | 8  | 6  | 6  | 11 | 11 | 7  | 13 | 6  | 14 | 8  | 13 | 6  | 15 | 13 | 4  | 4  | 7  | 5  | 13 | 16 | 9  | 6  | 13 | 9  | 7  | 15 | 16 | 18 | 8  | 10 | 20 | 10 | 6  | 12 | 8  |
| Less than four ANC visits      | 6  | 20 | 14 | 20 | 18 | 20 | 6  | 3  | 3  | 5  | 7  | 7  | 12 | 11 | 5  | 1  | 5  | 20 | 9  | 3  | 4  | 19 | 10 | 12 | 10 | 19 | 6  | 10 | 6  | 2  | 8  | 2  | 10 | 4  | 16 |
| Unimproved sanitation          | 15 | 12 | 16 | 16 | 7  | 18 | 12 | 4  | 13 | 11 | 9  | 13 | 11 | 15 | 14 | 18 | 9  | 15 | 10 | 13 | 5  | 9  | 4  | 13 | 12 | 16 | 5  | 13 | 14 | 1  | 10 | 14 | 19 | 13 | 17 |
| Had diarrhea, but not used ORT | 18 | 9  | 3  | 8  | 17 | 19 | 2  | 17 | 12 | 1  | 17 | 18 | 4  | 10 | 10 | 20 | 4  | 7  | 14 | 10 | 20 | 13 | 20 | 19 | 4  | 7  | 1  | 1  | 7  | 6  | 17 | 19 | 17 | 19 | 20 |
| Unsafe stool disposal          | 19 | 8  | 9  | 17 | 15 | 16 | 5  | 14 | 5  | 18 | 5  | 8  | 5  | 8  | 12 | 6  | 11 | 2  | 5  | 6  | 15 | 11 | 6  | 4  | 16 | 10 | 2  | 6  | 11 | 8  | 14 | 16 | 7  | 17 | 14 |
| High indoor pollution          | 13 | 2  | 12 | 12 | 8  | 12 | 11 | 11 | 11 | 4  | 3  | 17 | 3  | 16 | 16 | 3  | 14 | 11 | 2  | 15 | 11 | 4  | 5  | 10 | 9  | 20 | 14 | 3  | 9  | 14 | 1  | 5  | 9  | 6  | 7  |
| Not fully vaccinated           | 14 | 14 | 8  | 4  | 4  | 15 | 8  | 20 | 16 | 13 | 12 | 9  | 7  | 19 | 6  | 17 | 16 | 14 | 6  | 19 | 7  | 10 | 17 | 11 | 20 | 13 | 7  | 20 | 16 | 19 | 9  | 12 | 15 | 16 | 15 |
| Infectious disease             | 7  | 15 | 18 | 6  | 3  | 3  | 19 | 16 | 2  | 19 | 19 | 11 | 18 | 20 | 8  | 2  | 15 | 6  | 8  | 7  | 3  | 18 | 3  | 2  | 11 | 14 | 8  | 19 | 12 | 16 | 11 | 6  | 3  | 7  | 9  |
| Child marriage                 | 16 | 11 | 13 | 10 | 19 | 8  | 9  | 9  | 17 | 12 | 16 | 10 | 9  | 18 | 15 | 19 | 18 | 17 | 12 | 14 | 6  | 16 | 11 | 7  | 18 | 4  | 15 | 11 | 15 | 18 | 16 | 9  | 13 | 10 | 5  |
| Delayed breastfeeding          | 9  | 17 | 17 | 19 | 16 | 10 | 17 | 5  | 18 | 20 | 8  | 14 | 17 | 7  | 7  | 5  | 8  | 8  | 11 | 18 | 13 | 8  | 15 | 15 | 17 | 9  | 11 | 2  | 17 | 9  | 15 | 17 | 14 | 8  | 6  |
| FP need unsatisfied            | 12 | 16 | 11 | 18 | 5  | 14 | 4  | 12 | 20 | 7  | 11 | 16 | 8  | 6  | 9  | 8  | 6  | 4  | 17 | 8  | 16 | 17 | 14 | 5  | 13 | 17 | 10 | 17 | 10 | 7  | 12 | 11 | 18 | 14 | 2  |
| No vit A supplement            | 11 | 10 | 7  | 7  | 12 | 6  | 18 | 15 | 8  | 6  | 15 | 15 | 10 | 5  | 13 | 15 | 13 | 18 | 7  | 20 | 10 | 15 | 9  | 16 | 8  | 6  | 13 | 4  | 18 | 17 | 19 | 15 | 16 | 20 | 18 |
| No iodized salt                | 10 | 4  | 20 | 9  | 20 | 9  | 3  | 18 | 9  | 16 | 6  | 12 | 14 | 17 | 3  | 16 | 20 | 3  | 15 | 17 | 12 | 3  | 19 | 17 | 14 | 11 | 3  | 12 | 19 | 3  | 3  | 13 | 11 | 9  | 4  |
| Unsafe water                   | 20 | 18 | 10 | 5  | 14 | 4  | 16 | 7  | 7  | 17 | 10 | 20 | 19 | 2  | 11 | 7  | 19 | 9  | 4  | 9  | 8  | 20 | 7  | 8  | 6  | 5  | 18 | 5  | 20 | 15 | 18 | 18 | 12 | 15 | 3  |
| No care seeking for susp pneu  | 17 | 19 | 15 | 14 | 6  | 11 | 14 | 13 | 19 | 14 | 4  | 19 | 16 | 14 | 17 | 11 | 10 | 12 | 16 | 12 | 17 | 1  | 8  | 18 | 15 | 12 | 19 | 16 | 13 | 12 | 13 | 20 | 8  | 11 | 12 |

**Label:** Rank 1<sup>st</sup> Rank 2<sup>nd</sup> Rank 3<sup>rd</sup>-4<sup>th</sup> Rank 5<sup>th</sup>-7<sup>th</sup> Rank 8<sup>th</sup>-12<sup>nd</sup> Rank 13<sup>th</sup>-20<sup>th</sup>

**E) Wasting, children living in rural areas, total n=218,006**

|                                | BJ | BF | BI | CM | CI | CD | ET | GM | GH | GN | HT | IN | KE | KG | KM | LS | LR | MW | ML | MZ | MM | NA | NP | NE | PE | ST | SL | SZ | TD | TJ | TZ | TG | UG | ZM | ZW |
|--------------------------------|----|----|----|----|----|----|----|----|----|----|----|----|----|----|----|----|----|----|----|----|----|----|----|----|----|----|----|----|----|----|----|----|----|----|----|
| Short maternal stature         | 15 | 4  | 20 | 6  | 12 | 2  | 2  | 3  | 11 | 5  | 3  | 4  | 10 | 9  | 4  | 12 | 5  | 2  | 13 | 4  | 19 | 11 | 20 | 1  | 7  | 19 | 20 | 12 | 2  | 12 | 1  | 12 | 9  | 4  | 1  |
| Lack of maternal education     | 8  | 5  | 19 | 9  | 7  | 4  | 20 | 10 | 12 | 3  | 1  | 5  | 2  | 19 | 18 | 8  | 19 | 20 | 10 | 6  | 11 | 5  | 3  | 6  | 11 | 16 | 3  | 18 | 8  | 20 | 8  | 2  | 19 | 18 | 12 |
| Poorest HH wealth              | 20 | 11 | 3  | 1  | 13 | 1  | 3  | 14 | 17 | 20 | 20 | 3  | 1  | 2  | 1  | 14 | 9  | 10 | 8  | 1  | 7  | 1  | 19 | 3  | 17 | 14 | 18 | 2  | 6  | 4  | 9  | 20 | 1  | 1  | 11 |
| Low maternal BMI               | 1  | 2  | 1  | 7  | 1  | 12 | 1  | 6  | 1  | 2  | 2  | 1  | 4  | 3  | 9  | 1  | 2  | 1  | 1  | 5  | 1  | 6  | 5  | 2  | 12 | 4  | 2  | 11 | 3  | 1  | 3  | 1  | 2  | 11 | 3  |
| Poor dietary diversity         | 14 | 1  | 17 | 2  | 16 | 9  | 4  | 13 | 20 | 1  | 13 | 2  | 19 | 7  | 2  | 6  | 18 | 4  | 16 | 2  | 8  | 3  | 2  | 16 | 20 | 8  | 1  | 7  | 12 | 8  | 5  | 19 | 13 | 16 | 4  |
| No SBA                         | 6  | 17 | 6  | 3  | 17 | 3  | 6  | 7  | 8  | 4  | 5  | 15 | 9  | 10 | 17 | 11 | 8  | 8  | 11 | 18 | 4  | 9  | 12 | 19 | 14 | 17 | 8  | 20 | 13 | 15 | 4  | 7  | 8  | 2  | 17 |
| Less than four ANC visits      | 12 | 19 | 13 | 5  | 20 | 20 | 5  | 1  | 3  | 10 | 16 | 19 | 3  | 18 | 16 | 19 | 13 | 19 | 19 | 19 | 2  | 2  | 7  | 20 | 3  | 6  | 10 | 19 | 1  | 7  | 20 | 14 | 20 | 19 | 5  |
| Unimproved sanitation          | 19 | 15 | 11 | 10 | 3  | 16 | 19 | 12 | 5  | 8  | 4  | 7  | 18 | 4  | 7  | 7  | 6  | 14 | 4  | 14 | 14 | 20 | 10 | 9  | 16 | 7  | 4  | 10 | 4  | 11 | 16 | 4  | 11 | 6  | 7  |
| Had diarrhea, but not used ORT | 2  | 6  | 4  | 8  | 8  | 6  | 7  | 9  | 7  | 6  | 8  | 10 | 7  | 8  | 3  | 9  | 3  | 11 | 7  | 15 | 18 | 13 | 4  | 4  | 18 | 3  | 17 | 13 | 7  | 2  | 19 | 18 | 18 | 5  | 9  |
| Unsafe stool disposal          | 17 | 3  | 15 | 17 | 10 | 19 | 8  | 4  | 16 | 15 | 18 | 12 | 6  | 17 | 5  | 18 | 17 | 18 | 9  | 9  | 3  | 8  | 18 | 8  | 6  | 9  | 13 | 9  | 5  | 6  | 7  | 9  | 15 | 17 | 16 |
| High indoor pollution          | 3  | 20 | 18 | 13 | 11 | 10 | 14 | 20 | 18 | 11 | 12 | 9  | 5  | 13 | 12 | 15 | 10 | 12 | 2  | 20 | 10 | 15 | 6  | 11 | 1  | 12 | 12 | 5  | 20 | 14 | 13 | 13 | 10 | 20 | 2  |
| Not fully vaccinated           | 9  | 16 | 8  | 12 | 18 | 15 | 17 | 15 | 19 | 18 | 7  | 11 | 12 | 12 | 6  | 4  | 12 | 6  | 12 | 7  | 15 | 12 | 14 | 7  | 2  | 10 | 15 | 14 | 10 | 16 | 6  | 17 | 16 | 12 | 19 |
| Infectious disease             | 16 | 10 | 10 | 20 | 5  | 5  | 16 | 19 | 15 | 7  | 14 | 14 | 14 | 20 | 19 | 16 | 20 | 5  | 6  | 8  | 12 | 16 | 16 | 17 | 5  | 20 | 9  | 8  | 17 | 19 | 2  | 8  | 7  | 14 | 14 |
| Child marriage                 | 7  | 12 | 7  | 18 | 4  | 14 | 11 | 11 | 13 | 13 | 19 | 17 | 15 | 6  | 14 | 13 | 16 | 9  | 14 | 16 | 13 | 10 | 9  | 13 | 9  | 11 | 7  | 17 | 11 | 3  | 18 | 5  | 12 | 9  | 8  |
| Delayed breastfeeding          | 13 | 13 | 12 | 4  | 19 | 11 | 12 | 18 | 14 | 19 | 9  | 18 | 17 | 15 | 15 | 10 | 14 | 16 | 5  | 10 | 5  | 7  | 11 | 15 | 13 | 5  | 14 | 3  | 9  | 9  | 12 | 6  | 6  | 15 | 13 |
| FP need unsatisfied            | 18 | 9  | 16 | 11 | 14 | 17 | 18 | 16 | 2  | 17 | 6  | 16 | 16 | 16 | 8  | 20 | 11 | 17 | 17 | 17 | 16 | 19 | 13 | 14 | 4  | 13 | 11 | 6  | 16 | 18 | 11 | 16 | 17 | 7  | 20 |
| No vit A supplement            | 5  | 8  | 14 | 15 | 9  | 7  | 15 | 8  | 4  | 16 | 10 | 8  | 13 | 5  | 11 | 2  | 7  | 13 | 18 | 3  | 20 | 18 | 17 | 5  | 19 | 1  | 16 | 1  | 15 | 10 | 17 | 3  | 14 | 10 | 18 |
| No iodized salt                | 11 | 18 | 2  | 16 | 2  | 8  | 9  | 17 | 10 | 9  | 11 | 13 | 20 | 11 | 20 | 17 | 1  | 3  | 15 | 12 | 17 | 17 | 8  | 18 | 15 | 2  | 19 | 4  | 19 | 5  | 10 | 11 | 3  | 3  | 6  |
| Unsafe water                   | 10 | 14 | 5  | 19 | 15 | 18 | 10 | 5  | 9  | 14 | 17 | 6  | 8  | 14 | 13 | 5  | 15 | 7  | 20 | 13 | 6  | 14 | 15 | 12 | 8  | 18 | 6  | 15 | 18 | 17 | 15 | 10 | 4  | 8  | 10 |
| No care seeking for susp pneu  | 4  | 7  | 9  | 14 | 6  | 13 | 13 | 2  | 6  | 12 | 15 | 20 | 11 | 1  | 10 | 3  | 4  | 15 | 3  | 11 | 9  | 4  | 1  | 10 | 10 | 15 | 5  | 16 | 14 | 13 | 14 | 15 | 5  | 13 | 15 |





**F) Wasting, children living in urban areas, total n=81,347**

|                                | BJ | BF | BI | CM | CI | CD | ET | GM | GH | GN | HT | IN | KE | KG | KM | LS | LR | MW | ML | MZ | MM | NA | NP | NE | PE | ST | SL | SZ | TD | TJ | TZ | TG | UG | ZM | ZW |
|--------------------------------|----|----|----|----|----|----|----|----|----|----|----|----|----|----|----|----|----|----|----|----|----|----|----|----|----|----|----|----|----|----|----|----|----|----|----|
| Short maternal stature         | 1  | 11 | 3  | 11 | 10 | 4  | 20 | 8  | 12 | 14 | 13 | 5  | 16 | 11 | 20 | NA | 10 | 13 | 20 | 1  | 13 | 11 | 18 | 1  | 3  | 13 | 16 | NA | 20 | 15 | 12 | 1  | 8  | 20 | 10 |
| Lack of maternal education     | 17 | 7  | 20 | 4  | 2  | 18 | 10 | 6  | 1  | 8  | 20 | 2  | 2  | 6  | 1  | NA | 15 | 10 | 5  | 5  | 18 | 14 | 7  | 16 | 15 | 3  | 3  | NA | 2  | 14 | 1  | 3  | 6  | 18 | 12 |
| Poorest HH wealth              | 20 | 4  | 13 | 9  | 9  | 12 | 6  | 18 | 17 | 13 | 1  | 13 | 9  | 7  | 19 | NA | 2  | 3  | 1  | 3  | 6  | 15 | 8  | 14 | 18 | 18 | 18 | NA | 5  | 10 | 18 | 10 | 20 | 17 | 11 |
| Low maternal BMI               | 2  | 6  | 1  | 3  | 5  | 1  | 1  | 2  | 18 | 9  | 12 | 1  | 5  | 2  | 12 | NA | 9  | 7  | 7  | 2  | 2  | 6  | 3  | 3  | 1  | 19 | 5  | NA | 1  | 4  | 8  | 2  | 11 | 2  | 1  |
| Poor dietary diversity         | 9  | 2  | 10 | 5  | 15 | 16 | 3  | 3  | 11 | 2  | 14 | 4  | 6  | 19 | 3  | NA | 12 | 4  | 18 | 7  | 1  | 7  | 13 | 6  | 2  | 17 | 19 | NA | 8  | 20 | 19 | 16 | 12 | 3  | 9  |
| No SBA                         | 14 | 3  | 6  | 7  | 14 | 2  | 11 | 20 | 5  | 7  | 16 | 12 | 7  | 9  | 7  | NA | 7  | 16 | 19 | 6  | 19 | 8  | 10 | 8  | 6  | 4  | 15 | NA | 12 | 8  | 14 | 8  | 3  | 6  | 13 |
| Less than four ANC visits      | 19 | 20 | 17 | 20 | 20 | 14 | 4  | 1  | 2  | 1  | 6  | 17 | 10 | 17 | 13 | NA | 3  | 9  | 12 | 20 | 15 | 3  | 16 | 13 | 14 | 1  | 7  | NA | 11 | 1  | 10 | 20 | 1  | 1  | 14 |
| Unimproved sanitation          | 8  | 13 | 19 | 6  | 16 | 17 | 13 | 17 | 8  | 17 | 8  | 3  | 13 | 14 | 8  | NA | 19 | 18 | 3  | 13 | 14 | 5  | 2  | 9  | 7  | 7  | 11 | NA | 4  | 13 | 15 | 9  | 4  | 16 | 18 |
| Had diarrhea, but not used ORT | 13 | 8  | 2  | 14 | 19 | 20 | 2  | 19 | 4  | 4  | 18 | 6  | 1  | 13 | 2  | NA | 16 | 5  | 16 | 10 | 10 | 9  | 14 | 15 | 5  | 20 | 1  | NA | 7  | 18 | 20 | 6  | 7  | 19 | 8  |
| Unsafe stool disposal          | 18 | 5  | 5  | 17 | 12 | 9  | 5  | 12 | 6  | 19 | 2  | 10 | 4  | 15 | 11 | NA | 8  | 14 | 11 | 4  | 8  | 12 | 5  | 2  | 20 | 8  | 2  | NA | 16 | 5  | 7  | 19 | 5  | 5  | 17 |
| High indoor pollution          | 3  | 19 | 11 | 19 | 4  | 10 | 7  | 16 | 14 | 11 | 17 | 16 | 12 | 10 | 17 | NA | 11 | 19 | 2  | 18 | 16 | 17 | 9  | 4  | 12 | 16 | 12 | NA | 3  | 12 | 4  | 18 | 16 | 12 | 6  |
| Not fully vaccinated           | 6  | 14 | 15 | 1  | 7  | 5  | 12 | 9  | 15 | 5  | 10 | 14 | 11 | 3  | 10 | NA | 14 | 15 | 14 | 8  | 4  | 19 | 15 | 18 | 10 | 11 | 8  | NA | 9  | 7  | 6  | 5  | 19 | 10 | 2  |
| Infectious disease             | 4  | 9  | 14 | 2  | 1  | 6  | 17 | 4  | 20 | 20 | 9  | 11 | 20 | 20 | 9  | NA | 13 | 2  | 4  | 11 | 11 | 20 | 1  | 10 | 17 | 6  | 9  | NA | 6  | 19 | 17 | 11 | 18 | 8  | 7  |
| Child marriage                 | 16 | 12 | 18 | 16 | 8  | 7  | 8  | 13 | 10 | 10 | 11 | 8  | 18 | 16 | 16 | NA | 17 | 20 | 13 | 12 | 9  | 18 | 17 | 17 | 11 | 10 | 17 | NA | 18 | 16 | 16 | 4  | 14 | 4  | 5  |
| Delayed breastfeeding          | 15 | 15 | 7  | 15 | 13 | 15 | 15 | 5  | 16 | 18 | 7  | 18 | 8  | 18 | 18 | NA | 4  | 17 | 9  | 15 | 7  | 2  | 11 | 20 | 8  | 9  | 13 | NA | 15 | 3  | 3  | 13 | 15 | 11 | 19 |
| FP need unsatisfied            | 7  | 17 | 4  | 8  | 11 | 11 | 16 | 15 | 19 | 12 | 15 | 15 | 14 | 4  | 4  | NA | 5  | 11 | 6  | 16 | 20 | 16 | 12 | 5  | 13 | 15 | 6  | NA | 13 | 6  | 9  | 17 | 13 | 15 | 20 |
| No vit A supplement            | 12 | 10 | 12 | 12 | 17 | 8  | 19 | 10 | 7  | 3  | 3  | 9  | 3  | 5  | 6  | NA | 6  | 6  | 8  | 14 | 17 | 13 | 19 | 7  | 9  | 5  | 10 | NA | 14 | 17 | 2  | 14 | 2  | 7  | 16 |
| No iodized salt                | 5  | 1  | 9  | 13 | 18 | 19 | 9  | 14 | 9  | 6  | 4  | 7  | 19 | 12 | 14 | NA | 20 | 1  | 10 | 9  | 5  | 10 | 4  | 11 | 19 | 2  | 4  | NA | 19 | 2  | 11 | 12 | 9  | 9  | 3  |
| Unsafe water                   | 11 | 16 | 8  | 18 | 3  | 3  | 18 | 7  | 13 | 16 | 5  | 19 | 17 | 1  | 5  | NA | 18 | 12 | 17 | 19 | 12 | 1  | 6  | 12 | 4  | 12 | 20 | NA | 17 | 11 | 5  | 7  | 17 | 14 | 15 |
| No care seeking for susp pneu  | 10 | 18 | 16 | 10 | 6  | 13 | 14 | 11 | 3  | 15 | 19 | 20 | 15 | 8  | 15 | NA | 1  | 8  | 15 | 17 | 3  | 4  | 20 | 19 | 16 | 14 | 14 | NA | 10 | 9  | 13 | 15 | 10 | 13 | 4  |

**Label:** Rank 1<sup>st</sup> Rank 2<sup>nd</sup> Rank 3<sup>rd</sup>-4<sup>th</sup> Rank 5<sup>th</sup>-7<sup>th</sup> Rank 8<sup>th</sup>-12<sup>nd</sup> Rank 13<sup>th</sup>-20<sup>th</sup>

**eFigure 15. Country-Specific Odds Ratios for 20 Factors Associated With Child Anthropometric Failures From Fully Adjusted Models, Stratified by Place of Residence**  
**A) stunting among children 12-23 months old, B) stunting among children 24-59 months old, C) underweight among children 12-23 months old, D) underweight among children 24-59 months old, E) wasting among children 12-23 months old, and F) wasting among children 24-59 months old**

**A) Stunting, children living in rural areas, total n=218,006**

|                                | BJ  | BF  | BI  | CM  | CI  | CD   | ET  | GM  | GH  | GN  | HT  | IN  | KE  | KG  | KM  | LS   | LR  | MW  | ML  | MZ  | MM  | NA  | NP   | NE  | PE   | ST   | SL  | SZ   | TD   | TJ  | TZ  | TG  | UG  | ZM  | ZW  |     |
|--------------------------------|-----|-----|-----|-----|-----|------|-----|-----|-----|-----|-----|-----|-----|-----|-----|------|-----|-----|-----|-----|-----|-----|------|-----|------|------|-----|------|------|-----|-----|-----|-----|-----|-----|-----|
| Short maternal stature         | 8.8 | 6.6 | 9.4 | 3.9 | 1.8 | 3.4  | 3.0 | 2.3 | 3.6 | 0.7 | 5.6 | 4.4 | 6.0 | 3.5 | 1.4 | 4.7  | 3.7 | 7.3 | 1.3 | 4.2 | 4.5 | 2.7 | 28.9 | 1.2 | 11.3 | 18.4 | 2.7 | 9.4  | 1.1  | 4.1 | 5.6 | 5.3 | 9.9 | 5.2 | 9.5 |     |
| Lack of maternal education     | 2.1 | 3.1 | 2.3 | 1.4 | 2.3 | 13.2 | 2.1 | 2.1 | 1.9 | 1.1 | 1.2 | 1.9 | 1.1 | 0.6 | 6.1 | 2.5  | 1.1 | 2.8 | 5.8 | 1.0 | 1.3 | 0.6 | 0.6  | 1.4 | 8.2  | 0.8  | 1.2 | 0.9  | 0.2  | 1.2 | 2.6 | 1.4 | 3.6 | 3.4 | 3.1 |     |
| Poorest HH wealth              | 2.2 | 3.1 | 2.5 | 5.9 | 2.0 | 3.0  | 2.2 | 1.0 | 0.6 | 5.1 | 2.1 | 1.5 | 2.1 | 1.1 | 1.9 | 33.2 | 7.6 | 2.0 | 3.6 | 2.1 | 1.1 | 1.8 | 6.4  | 1.0 | 2.1  | 4.1  | 2.2 | 23.1 | 0.9  | 0.7 | 2.2 | 1.6 | 2.7 | 1.7 | 0.6 |     |
| Low maternal BMI               | 1.8 | 1.8 | 2.0 | 1.6 | 2.9 | 1.7  | 1.2 | 1.4 | 1.7 | 0.8 | 1.7 | 1.7 | 1.5 | 2.6 | 2.2 | 4.3  | 1.5 | 2.2 | 2.1 | 1.5 | 1.8 | 1.5 | 1.4  | 1.6 | 0.5  | 1.9  | 1.4 | 10.1 | 1.5  | 1.6 | 1.8 | 2.1 | 1.4 | 1.9 | 2.0 |     |
| Poor dietary diversity         | 1.0 | 1.4 | 1.0 | 2.4 | 1.6 | 1.2  | 2.5 | 0.7 | 1.0 | 1.3 | 1.2 | 1.2 | 1.0 | 1.1 | 0.9 | 0.9  | 1.4 | 1.1 | 2.1 | 1.4 | 0.8 | 1.0 | 0.6  | 1.6 | 1.4  | 3.5  | 1.3 | 0.5  | 1.3  | 1.8 | 1.1 | 1.1 | 1.4 | 1.1 | 0.9 |     |
| No SBA                         | 1.4 | 1.3 | 1.4 | 1.0 | 0.8 | 1.0  | 1.0 | 1.2 | 1.7 | 1.0 | 1.1 | 1.1 | 1.3 | 1.8 | 1.1 | 1.8  | 1.1 | 1.1 | 1.2 | 1.2 | 1.5 | 1.0 | 1.0  | 1.0 | 1.6  | 1.3  | 1.0 | 2.0  | 1.3  | 1.1 | 1.2 | 1.0 | 1.0 | 1.0 | 1.2 |     |
| Less than four ANC visits      | 3.2 | 0.3 | 0.0 | 1.6 | 0.6 | 0.7  | 0.6 | 2.3 | 1.1 | 1.5 | 1.2 | 1.2 | 1.2 | 0.6 | 1.0 | 3.0  | 0.8 | 0.5 | 1.6 | 2.5 | 1.2 | 2.4 | 1.7  | 1.4 | 0.8  | 0.5  | 0.9 | 0.9  | 1.2  | 1.3 | 0.5 | 6.3 | 3.6 | 1.5 | 1.7 |     |
| Unimproved sanitation          | 1.0 | 1.0 | 1.1 | 0.8 | 1.1 | 0.9  | 1.1 | 1.4 | 0.9 | 1.1 | 1.3 | 1.1 | 1.1 | 0.8 | 0.9 | 0.7  | 1.2 | 1.0 | 1.0 | 1.3 | 0.9 | 0.5 | 1.8  | 1.0 | 1.2  | 0.6  | 0.9 | 0.8  | 1.0  | 0.8 | 1.0 | 1.1 | 0.9 | 0.9 | 1.3 |     |
| Had diarrhea, but not used ORT | 1.4 | 1.1 | 1.0 | 1.2 | 0.8 | 1.2  | 1.2 | 0.9 | 0.8 | 1.0 | 1.3 | 1.1 | 1.0 | 0.5 | 1.5 | 11.0 | 0.8 | 1.3 | 1.2 | 1.1 | 0.9 | 1.6 | 1.4  | 0.8 | 0.9  | 1.8  | 0.5 | 6.1  | 1.2  | 1.5 | 1.4 | 1.1 | 1.0 | 0.9 | 0.7 |     |
| Unsafe stool disposal          | 1.0 | 1.1 | 1.4 | 1.3 | 1.1 | 1.2  | 0.8 | 1.4 | 1.7 | 1.1 | 1.0 | 1.1 | 1.0 | 1.3 | 0.8 | 1.2  | 1.0 | 1.1 | 1.3 | 0.7 | 1.1 | 0.8 | 1.4  | 1.3 | 0.9  | 1.8  | 0.9 | 0.9  | 1.1  | 1.5 | 1.1 | 1.3 | 1.2 | 1.0 | 1.0 |     |
| High indoor pollution          | 2.4 | 0.6 | 1.0 | 0.3 | 5.7 | 1.0  | 0.4 | 1.4 | 0.6 | 1.2 | 2.0 | 1.1 | 2.1 | 1.3 | 0.7 | 0.3  | 1.0 | 1.8 | 0.5 | 1.1 | 1.0 | 3.6 | 1.1  | 0.3 | 1.2  | 2.0  | 0.4 | 0.5  | 17.3 | 1.1 | 0.7 | 1.0 | 1.0 | 1.4 | 1.8 |     |
| Not fully vaccinated           | 1.0 | 1.1 | 1.3 | 1.0 | 1.3 | 0.9  | 1.0 | 1.4 | 1.4 | 1.1 | 1.0 | 1.0 | 1.0 | 1.6 | 1.5 | 0.8  | 1.0 | 0.9 | 0.9 | 0.9 | 0.9 | 2.7 | 1.1  | 1.0 | 1.0  | 2.7  | 1.0 | 1.6  | 1.0  | 0.8 | 0.9 | 1.4 | 0.9 | 1.1 | 1.2 |     |
| Infectious disease             | 1.1 | 1.1 | 1.0 | 0.9 | 1.0 | 0.9  | 1.1 | 0.9 | 1.2 | 1.3 | 1.0 | 1.1 | 0.9 | 1.3 | 1.1 | 0.3  | 1.3 | 0.8 | 0.9 | 1.3 | 1.0 | 0.9 | 1.1  | 1.4 | 1.0  | 2.2  | 0.8 | 0.7  | 1.1  | 0.7 | 0.9 | 0.9 | 0.7 | 1.1 | 1.3 |     |
| Child marriage                 | 1.1 | 0.9 | 1.1 | 0.8 | 1.3 | 1.1  | 0.9 | 0.9 | 1.1 | 1.0 | 0.9 | 1.1 | 1.1 | 0.9 | 1.1 | 1.0  | 1.0 | 0.9 | 1.0 | 0.9 | 1.1 | 0.5 | 0.7  | 1.0 | 1.0  | 1.4  | 1.0 | 1.2  | 1.0  | 0.8 | 0.8 | 1.2 | 0.9 | 1.1 | 1.1 |     |
| Delayed breastfeeding          | 1.0 | 1.0 | 1.0 | 1.0 | 1.0 | 1.1  | 1.1 | 1.0 | 0.9 | 1.0 | 1.3 | 1.1 | 1.2 | 1.7 | 1.0 | 1.0  | 1.3 | 1.5 | 1.0 | 1.0 | 1.0 | 0.8 | 1.0  | 1.1 | 1.1  | 0.5  | 1.3 | 0.9  | 0.9  | 0.9 | 0.9 | 1.1 | 0.9 | 1.0 | 0.9 |     |
| FP need unsatisfied            | 1.2 | 1.0 | 1.0 | 1.1 | 1.1 | 0.9  | 1.1 | 1.1 | 0.7 | 1.0 | 1.1 | 1.0 | 1.0 | 1.4 | 1.5 | 0.5  | 1.2 | 1.2 | 1.1 | 1.0 | 1.0 | 1.3 | 1.0  | 1.0 | 1.0  | 0.7  | 1.2 | 1.3  | 1.0  | 1.0 | 1.0 | 1.0 | 1.0 | 1.0 | 1.0 | 1.2 |
| No vit A supplement            | 0.8 | 0.8 | 1.2 | 1.0 | 1.5 | 1.4  | 0.8 | 2.3 | 1.1 | 1.1 | 0.8 | 1.0 | 0.9 | 1.0 | 0.9 | 0.5  | 0.9 | 1.0 | 1.2 | 0.8 | 1.1 | 1.1 | 1.4  | 1.4 | 1.4  | 2.0  | 1.1 | 1.3  | 0.9  | 0.5 | 1.0 | 1.1 | 1.0 | 1.0 | 0.9 |     |
| No iodized salt                | 0.9 | 0.8 | 0.8 | 1.6 | 1.5 | 1.2  | 0.9 | 0.9 | 0.9 | 1.1 | 1.0 | 0.9 | 1.0 | 0.9 | 1.3 | 1.1  | 0.8 | 0.9 | 1.1 | 1.0 | 1.1 | 0.6 | 0.6  | 1.0 | 1.0  | 0.8  | 1.4 | 1.0  | 0.8  | 1.0 | 1.0 | 1.0 | 0.7 | 0.8 | 1.0 |     |
| Unsafe water                   | 1.0 | 1.0 | 0.9 | 1.1 | 0.9 | 1.1  | 1.0 | 0.8 | 0.5 | 1.0 | 0.9 | 0.9 | 1.1 | 1.1 | 1.0 | 0.7  | 0.7 | 1.0 | 1.2 | 1.2 | 1.4 | 0.8 | 1.2  | 0.9 | 0.8  | 1.4  | 1.1 | 1.0  | 0.9  | 0.9 | 1.1 | 0.9 | 1.0 | 1.1 | 0.9 |     |
| No care seeking for susp pneu  | 0.8 | 1.2 | 1.0 | 1.0 | 1.1 | 1.3  | 1.0 | 1.0 | 0.5 | 1.0 | 1.1 | 0.9 | 1.0 | 0.6 | 1.1 | 2.5  | 0.7 | 1.2 | 1.2 | 0.7 | 0.9 | 2.2 | 0.9  | 0.7 | 1.0  | 1.0  | 0.9 | 1.4  | 1.0  | 1.0 | 1.0 | 0.9 | 0.8 | 1.0 | 0.8 |     |

Label: odds ratios

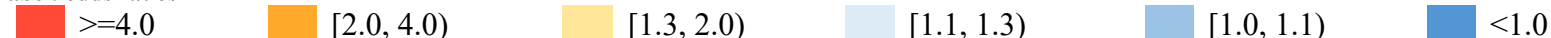

Note:

1. BJ= Benin, BF= Burkina Faso, BI= Burundi, CM=Cameroon, CI=Côte d'Ivoire, CD=The Democratic Republic of the Congo, ET=Ethiopia, GM=Gambia, GH=Ghana, GN=Guinea, HT=Haiti, IN=India, KE=Kenya, KG=Kyrgyzstan, KM=Comoros, LS=Lesotho, LR=Liberia, MW=Malawi, ML=Mali, MZ=Mozambique, MM=Myanmar, NA=Namibia, NP=Nepal, NE=Niger, PE=Peru, ST= São Tomé and Príncipe, SL=Sierra Leone, SZ=Swaziland, TD=Chad, TJ=Tajikistan, TZ=Tanzania, TG=Togo, UG=Uganda, ZM=Zambia, ZW=Zimbabwe.
2. Short maternal stature: maternal height <145cm; low maternal BMI: maternal BMI <18.5 kg/m2; child marriage: mother's age at marriage <18 years old; delayed breastfeeding: child was not initially breastfed within one hour after born; infectious disease: child was caught by infectious diseases two weeks prior to the survey.
3. Abbreviations - HH: household, BMI: body mass index; SBA: skilled birth attendant; ANC: antenatal care; ORT: oral rehydration therapy; FP: family planning; vit: vitamin; susp pneu: suspected pneumonia.

**B) Stunting, children living in urban areas, total n=81,347**

|                                | BJ  | BF  | BI   | CM  | CI   | CD  | ET  | GM  | GH    | GN  | HT  | IN  | KE  | KG  | KM  | LS  | LR  | MW   | ML  | MZ  | MM   | NA   | NP  | NE  | PE  | ST   | SL  | SZ   | TD  | TJ  | TZ  | TG  | UG   | ZM  | ZW    |
|--------------------------------|-----|-----|------|-----|------|-----|-----|-----|-------|-----|-----|-----|-----|-----|-----|-----|-----|------|-----|-----|------|------|-----|-----|-----|------|-----|------|-----|-----|-----|-----|------|-----|-------|
| Short maternal stature         | 7.5 | 1.0 | 16.4 | 1.0 | 30.2 | 6.5 | 0.6 | 1.0 | 114.3 | 0.6 | 1.0 | 4.6 | 0.2 | 3.4 | 0.6 | 0.3 | 3.4 | 33.1 | 0.1 | 7.3 | 50.1 | 13.1 | 5.3 | 1.0 | 8.7 | 1.6  | 1.1 | 1.0  | 3.2 | 6.3 | 7.3 | 1.0 | 92.6 | 4.4 | 4.2   |
| Lack of maternal education     | 2.1 | 5.1 | 10.3 | 2.0 | 75.5 | 1.9 | 1.7 | 0.6 | 3.1   | 8.3 | 1.3 | 2.0 | 0.9 | 1.2 | 2.3 | 1.0 | 3.7 | 1.6  | 3.9 | 2.0 | 0.5  | 5.4  | 2.1 | 7.9 | 2.3 | 1.7  | 5.7 | 13.9 | 2.6 | 0.7 | 1.7 | 2.4 | 10.7 | 2.0 | 115.5 |
| Poorest HH wealth              | 2.4 | 2.2 | 4.0  | 1.0 | 1.0  | 3.1 | 4.0 | 1.4 | 0.7   | 1.7 | 3.1 | 1.5 | 2.6 | 0.5 | 1.3 | 1.0 | 1.4 | 1.6  | 1.4 | 2.6 | 0.8  | 0.3  | 2.0 | 0.6 | 7.2 | 17.7 | 0.9 | 1.0  | 1.4 | 0.8 | 3.0 | 3.3 | 1.8  | 1.3 | 1.0   |
| Low maternal BMI               | 2.2 | 2.5 | 3.1  | 1.6 | 2.2  | 1.4 | 8.1 | 0.7 | 0.9   | 1.5 | 2.2 | 1.5 | 1.1 | 4.8 | 1.8 | 1.0 | 3.2 | 3.0  | 1.2 | 2.1 | 2.2  | 14.7 | 1.5 | 1.6 | 4.3 | 5.4  | 1.9 | 1.0  | 2.1 | 1.5 | 1.8 | 4.0 | 3.9  | 2.2 | 2.9   |
| Poor dietary diversity         | 0.9 | 2.2 | 6.5  | 1.3 | 0.5  | 1.5 | 1.0 | 1.3 | 0.7   | 2.2 | 0.7 | 1.1 | 1.6 | 2.5 | 0.3 | 1.2 | 1.1 | 0.2  | 1.7 | 1.6 | 1.4  | 0.2  | 0.6 | 1.2 | 0.9 | 0.8  | 0.2 | 0.4  | 1.3 | 1.7 | 3.2 | 3.6 | 0.6  | 0.9 | 1.9   |
| No SBA                         | 1.2 | 1.2 | 0.8  | 1.2 | 1.1  | 0.8 | 1.0 | 1.1 | 2.4   | 2.9 | 1.1 | 1.1 | 1.3 | 1.0 | 0.4 | 2.2 | 0.8 | 1.7  | 1.6 | 1.0 | 1.8  | 1.1  | 1.0 | 0.9 | 2.0 | 0.9  | 0.7 | 0.6  | 1.2 | 1.5 | 0.8 | 2.1 | 1.5  | 1.1 | 1.4   |
| Less than four ANC visits      | 2.6 | 5.3 | 0.4  | 1.6 | 5.3  | 0.7 | 1.3 | 0.5 | 1.6   | 1.6 | 1.5 | 1.2 | 1.2 | 1.0 | 1.8 | 3.0 | 1.2 | 0.0  | 1.2 | 1.1 | 1.2  | 0.2  | 0.9 | 3.1 | 1.2 | 0.6  | 1.7 | 1.8  | 1.6 | 1.0 | 1.0 | 1.8 | 8.0  | 0.8 | 0.9   |
| Unimproved sanitation          | 1.1 | 1.0 | 0.8  | 0.9 | 1.9  | 0.8 | 1.7 | 1.5 | 0.6   | 1.1 | 1.3 | 1.0 | 1.4 | 3.1 | 1.3 | 0.2 | 1.0 | 0.7  | 0.5 | 0.8 | 1.9  | 3.8  | 1.4 | 0.7 | 1.2 | 0.2  | 1.7 | 1.0  | 0.7 | 1.3 | 1.3 | 0.6 | 0.9  | 1.3 | 0.7   |
| Had diarrhea, but not used ORT | 1.0 | 1.0 | 0.6  | 1.0 | 1.1  | 0.9 | 0.2 | 0.5 | 0.2   | 3.5 | 0.5 | 1.1 | 1.3 | 0.9 | 1.2 | 5.9 | 1.8 | 3.0  | 1.5 | 0.9 | 1.0  | 10.1 | 0.3 | 0.8 | 1.1 | 0.8  | 0.3 | 1.0  | 1.1 | 1.7 | 0.9 | 0.5 | 0.5  | 1.5 | 0.7   |
| Unsafe stool disposal          | 0.9 | 1.6 | 0.6  | 1.0 | 1.2  | 0.9 | 0.8 | 1.0 | 0.8   | 1.3 | 1.8 | 1.1 | 0.9 | 0.7 | 0.8 | 0.5 | 1.0 | 2.1  | 0.8 | 1.4 | 1.5  | 1.3  | 1.2 | 1.8 | 1.2 | 3.4  | 1.7 | 0.6  | 1.2 | 1.0 | 0.8 | 1.5 | 1.8  | 0.9 | 0.6   |
| High indoor pollution          | 1.3 | 1.0 | 1.0  | 1.5 | 1.8  | 4.2 | 1.4 | 0.2 | 1.0   | 0.6 | 1.2 | 1.1 | 0.9 | 1.3 | 0.9 | 0.3 | 1.0 | 1.2  | 0.4 | 1.6 | 1.0  | 3.4  | 1.0 | 1.1 | 0.9 | 0.5  | 0.3 | 1.8  | 1.4 | 1.9 | 1.4 | 2.4 | 0.4  | 1.3 | 1.4   |
| Not fully vaccinated           | 1.0 | 1.5 | 0.6  | 1.1 | 1.0  | 1.1 | 0.8 | 0.8 | 1.5   | 0.7 | 1.0 | 1.1 | 0.9 | 0.6 | 1.5 | 0.7 | 1.3 | 3.0  | 1.6 | 1.0 | 2.0  | 2.1  | 0.6 | 1.3 | 1.1 | 1.7  | 1.2 | 1.1  | 0.8 | 0.6 | 1.4 | 1.3 | 0.7  | 0.8 | 1.1   |
| Infectious disease             | 0.9 | 0.9 | 1.4  | 1.4 | 0.9  | 1.3 | 1.2 | 0.6 | 1.0   | 0.9 | 0.8 | 1.0 | 1.0 | 1.5 | 1.2 | 0.5 | 0.8 | 0.5  | 1.0 | 1.0 | 0.9  | 2.8  | 1.4 | 1.2 | 0.8 | 3.2  | 1.3 | 1.1  | 0.9 | 1.2 | 0.8 | 2.4 | 2.0  | 0.8 | 1.2   |
| Child marriage                 | 1.1 | 0.9 | 1.2  | 1.3 | 0.6  | 1.3 | 0.8 | 1.5 | 1.4   | 0.7 | 1.3 | 1.0 | 1.2 | 1.4 | 1.1 | 1.0 | 0.5 | 1.1  | 1.2 | 1.2 | 2.5  | 1.4  | 1.4 | 1.4 | 1.1 | 1.3  | 0.8 | 1.1  | 0.9 | 0.9 | 0.8 | 0.7 | 0.5  | 1.2 | 1.2   |
| Delayed breastfeeding          | 1.1 | 0.7 | 1.7  | 0.9 | 0.5  | 1.2 | 1.2 | 0.8 | 0.6   | 0.6 | 0.7 | 1.1 | 1.0 | 0.5 | 0.8 | 3.9 | 1.3 | 0.5  | 1.3 | 0.7 | 1.7  | 2.5  | 0.9 | 0.6 | 0.8 | 1.8  | 1.0 | 5.3  | 1.0 | 0.8 | 0.8 | 0.9 | 1.5  | 1.0 | 1.4   |
| FP need unsatisfied            | 1.3 | 1.1 | 0.3  | 1.1 | 1.1  | 1.1 | 2.2 | 1.5 | 0.9   | 0.7 | 1.3 | 0.9 | 0.8 | 1.3 | 0.6 | 1.0 | 0.8 | 1.6  | 1.0 | 1.0 | 1.4  | 1.3  | 0.9 | 0.8 | 1.1 | 0.5  | 1.6 | 1.6  | 1.2 | 0.8 | 0.7 | 1.2 | 0.4  | 1.0 | 0.4   |
| No vit A supplement            | 0.9 | 1.1 | 0.5  | 1.6 | 1.2  | 1.3 | 0.5 | 0.4 | 1.2   | 2.6 | 1.0 | 1.0 | 0.9 | 1.1 | 1.0 | 0.8 | 1.5 | 1.4  | 1.1 | 0.6 | 1.7  | 0.9  | 0.9 | 0.9 | 1.3 | 0.9  | 1.1 | 3.5  | 0.9 | 1.3 | 0.7 | 1.1 | 0.4  | 0.8 | 1.2   |
| No iodized salt                | 0.9 | 1.7 | 0.4  | 1.0 | 1.6  | 0.7 | 2.3 | 0.7 | 1.3   | 1.1 | 1.2 | 1.1 | 0.8 | 0.5 | 0.8 | 1.5 | 0.4 | 0.7  | 0.9 | 0.7 | 0.8  | 1.1  | 0.6 | 0.6 | 0.9 | 0.5  | 1.0 | 24.6 | 0.9 | 0.9 | 2.2 | 0.6 | 94.2 | 1.2 | 0.5   |
| Unsafe water                   | 0.9 | 0.5 | 3.9  | 1.9 | 0.6  | 1.0 | 0.8 | 0.8 | 0.9   | 2.5 | 0.6 | 1.0 | 1.1 | 1.8 | 0.8 | 4.7 | 1.0 | 0.6  | 1.2 | 0.8 | 0.8  | 0.5  | 1.1 | 0.7 | 0.9 | 0.4  | 1.1 | 10.5 | 0.9 | 2.1 | 1.1 | 1.6 | 0.8  | 1.0 | 0.8   |
| No care seeking for susp pneu  | 1.2 | 0.4 | 1.5  | 1.0 | 2.2  | 1.2 | 1.0 | 0.8 | 0.7   | 1.0 | 1.4 | 0.9 | 1.0 | 0.5 | 0.7 | 0.8 | 0.9 | 0.5  | 1.3 | 1.0 | 0.9  | 0.3  | 0.6 | 0.5 | 1.0 | 1.0  | 0.3 | 11.2 | 1.0 | 1.0 | 1.0 | 0.7 | 0.1  | 1.0 | 1.5   |

Label: odds ratios

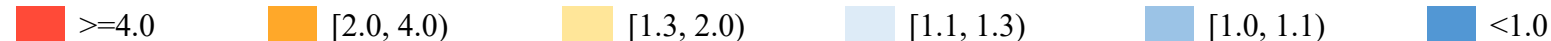

**C) Underweight, children living in rural areas, total n=218,006**

|                                | BJ  | BF  | BI  | CM  | CI  | CD  | ET   | GM  | GH  | GN  | HT  | IN  | KE  | KG  | KM  | LS  | LR  | MW  | ML  | MZ  | MM  | NA  | NP  | NE  | PE  | ST  | SL  | SZ  | TD  | TJ  | TZ  | TG   | UG  | ZM  | ZW  |
|--------------------------------|-----|-----|-----|-----|-----|-----|------|-----|-----|-----|-----|-----|-----|-----|-----|-----|-----|-----|-----|-----|-----|-----|-----|-----|-----|-----|-----|-----|-----|-----|-----|------|-----|-----|-----|
| Short maternal stature         | 4.8 | 4.9 | 3.7 | 2.2 | 2.1 | 4.0 | 4.2  | 6.5 | 3.9 | 2.3 | 5.1 | 3.4 | 6.4 | 1.0 | 2.0 | 5.9 | 2.8 | 6.0 | 1.3 | 3.4 | 4.4 | 1.0 | 2.4 | 1.4 | 4.3 | 3.4 | 2.2 | 6.2 | 1.1 | 2.2 | 8.1 | 10.9 | 7.2 | 3.9 | 2.8 |
| Lack of maternal education     | 1.1 | 1.5 | 0.7 | 2.5 | 2.5 | 3.0 | 36.3 | 0.4 | 1.6 | 1.4 | 3.3 | 1.7 | 2.4 | 0.3 | 1.7 | 5.8 | 1.1 | 0.5 | 1.5 | 1.3 | 0.6 | 0.6 | 1.6 | 1.5 | 3.5 | 0.3 | 1.5 | 1.6 | 1.6 | 0.8 | 1.3 | 1.9  | 9.8 | 1.2 | 0.9 |
| Poorest HH wealth              | 1.2 | 1.8 | 2.8 | 2.6 | 1.4 | 3.3 | 2.0  | 1.0 | 0.2 | 0.3 | 1.0 | 1.6 | 4.6 | 2.2 | 2.4 | 2.0 | 0.6 | 2.4 | 2.2 | 2.6 | 1.0 | 2.2 | 2.0 | 1.3 | 8.8 | 3.2 | 0.9 | 2.3 | 0.9 | 5.2 | 3.0 | 0.8  | 4.3 | 2.3 | 0.4 |
| Low maternal BMI               | 3.3 | 4.4 | 6.6 | 4.0 | 7.4 | 2.0 | 1.8  | 2.0 | 9.0 | 2.9 | 4.5 | 2.6 | 4.0 | 6.1 | 2.8 | 4.8 | 4.6 | 2.9 | 2.4 | 4.3 | 3.3 | 2.1 | 3.2 | 3.1 | 3.3 | 8.6 | 1.7 | 3.8 | 2.7 | 4.0 | 3.3 | 4.7  | 3.5 | 3.6 | 5.7 |
| Poor dietary diversity         | 1.0 | 0.9 | 1.0 | 2.9 | 1.0 | 1.6 | 2.5  | 0.9 | 1.4 | 1.4 | 1.3 | 1.4 | 0.7 | 1.7 | 1.4 | 0.5 | 1.9 | 1.5 | 1.9 | 1.8 | 1.4 | 0.8 | 1.5 | 1.4 | 0.4 | 2.4 | 1.6 | 0.7 | 1.2 | 2.1 | 1.0 | 0.9  | 1.9 | 0.8 | 0.6 |
| No SBA                         | 1.7 | 1.3 | 1.5 | 1.4 | 0.7 | 1.2 | 1.0  | 1.4 | 1.7 | 1.6 | 0.9 | 1.1 | 1.4 | 1.0 | 1.1 | 1.1 | 1.3 | 1.2 | 1.3 | 0.8 | 1.6 | 1.5 | 1.0 | 1.0 | 1.0 | 1.6 | 1.0 | 1.2 | 1.4 | 1.2 | 1.3 | 1.2  | 1.2 | 1.5 | 1.2 |
| Less than four ANC visits      | 1.1 | 0.2 | 0.8 | 4.7 | 0.9 | 0.7 | 1.7  | 2.5 | 0.7 | 1.5 | 1.0 | 1.1 | 1.2 | 0.9 | 0.7 | 0.9 | 0.6 | 0.6 | 0.7 | 0.4 | 1.7 | 1.4 | 1.8 | 1.0 | 0.7 | 5.5 | 1.6 | 0.2 | 1.5 | 1.2 | 0.3 | 1.0  | 1.1 | 2.6 | 1.7 |
| Unimproved sanitation          | 0.9 | 1.2 | 1.1 | 0.9 | 1.3 | 1.2 | 1.2  | 1.1 | 1.2 | 0.9 | 1.8 | 1.2 | 0.9 | 4.3 | 0.8 | 0.9 | 1.3 | 0.7 | 1.1 | 1.0 | 0.9 | 0.1 | 2.1 | 1.0 | 1.5 | 1.0 | 1.3 | 0.6 | 1.1 | 1.2 | 0.8 | 1.4  | 0.8 | 1.3 | 1.3 |
| Had diarrhea, but not used ORT | 1.3 | 1.1 | 1.4 | 1.5 | 1.5 | 1.4 | 1.6  | 1.8 | 0.5 | 1.2 | 1.4 | 1.2 | 1.1 | 1.0 | 1.7 | 6.8 | 1.1 | 1.1 | 1.3 | 1.8 | 0.5 | 1.2 | 1.2 | 1.2 | 1.0 | 6.0 | 0.9 | 3.6 | 1.4 | 2.1 | 1.2 | 1.5  | 1.1 | 1.0 | 0.9 |
| Unsafe stool disposal          | 1.0 | 1.1 | 1.2 | 1.2 | 1.2 | 1.2 | 1.1  | 1.2 | 1.2 | 1.2 | 0.9 | 1.1 | 1.0 | 1.8 | 1.1 | 1.1 | 1.2 | 1.3 | 1.2 | 1.0 | 1.5 | 2.9 | 0.7 | 1.4 | 1.1 | 2.2 | 0.7 | 1.1 | 1.1 | 1.2 | 1.3 | 1.8  | 1.4 | 0.9 | 0.9 |
| High indoor pollution          | 2.7 | 0.2 | 0.3 | 0.4 | 1.1 | 1.0 | 0.4  | 0.6 | 3.6 | 1.0 | 1.0 | 1.1 | 1.7 | 1.4 | 2.0 | 0.2 | 1.0 | 1.0 | 0.6 | 1.0 | 1.1 | 8.3 | 2.1 | 1.6 | 0.8 | 0.7 | 1.0 | 0.4 | 0.5 | 1.0 | 0.5 | 1.0  | 1.0 | 0.8 | 2.5 |
| Not fully vaccinated           | 1.1 | 1.1 | 1.3 | 1.1 | 0.9 | 1.0 | 0.9  | 1.2 | 1.2 | 1.1 | 1.3 | 1.0 | 0.9 | 1.4 | 1.5 | 0.4 | 1.3 | 1.3 | 1.0 | 1.2 | 0.9 | 1.3 | 1.2 | 1.0 | 1.2 | 2.9 | 1.3 | 1.4 | 1.6 | 0.9 | 1.2 | 1.4  | 1.0 | 1.3 | 1.1 |
| Infectious disease             | 1.2 | 1.2 | 0.8 | 1.0 | 1.0 | 1.0 | 0.9  | 0.5 | 0.9 | 1.1 | 1.0 | 1.0 | 1.1 | 4.7 | 0.9 | 0.3 | 1.1 | 1.0 | 1.0 | 1.1 | 1.4 | 0.2 | 1.0 | 1.4 | 0.9 | 0.2 | 0.8 | 1.0 | 1.0 | 0.6 | 1.2 | 0.9  | 0.6 | 1.2 | 1.1 |
| Child marriage                 | 1.0 | 1.0 | 1.1 | 0.8 | 1.1 | 1.1 | 0.9  | 0.9 | 0.5 | 0.9 | 0.8 | 1.0 | 0.8 | 0.7 | 1.0 | 1.1 | 1.0 | 1.1 | 1.0 | 0.9 | 1.2 | 0.4 | 0.7 | 1.0 | 1.1 | 0.8 | 1.0 | 1.0 | 0.9 | 1.0 | 0.9 | 1.2  | 0.9 | 1.1 | 1.2 |
| Delayed breastfeeding          | 1.0 | 0.9 | 1.2 | 1.1 | 0.6 | 0.9 | 1.0  | 0.7 | 0.8 | 1.0 | 1.1 | 1.0 | 0.9 | 0.6 | 1.1 | 0.8 | 1.3 | 1.3 | 1.0 | 0.9 | 0.9 | 1.2 | 0.9 | 1.1 | 1.2 | 1.1 | 1.1 | 0.8 | 0.9 | 0.9 | 0.9 | 1.1  | 1.2 | 1.1 | 1.0 |
| FP need unsatisfied            | 1.2 | 1.2 | 1.0 | 1.3 | 1.0 | 0.8 | 1.0  | 1.0 | 0.8 | 1.1 | 1.0 | 1.0 | 1.0 | 1.1 | 1.5 | 0.4 | 1.3 | 0.9 | 1.0 | 0.9 | 0.9 | 1.7 | 0.8 | 0.9 | 0.9 | 1.0 | 1.2 | 2.1 | 0.9 | 0.9 | 1.4 | 1.2  | 0.9 | 1.1 | 1.1 |
| No vit A supplement            | 1.1 | 0.9 | 1.2 | 1.0 | 1.3 | 1.1 | 0.8  | 1.7 | 1.1 | 1.4 | 1.1 | 1.1 | 0.9 | 1.3 | 0.9 | 0.5 | 0.9 | 0.8 | 0.9 | 1.2 | 1.0 | 2.1 | 1.2 | 1.4 | 1.4 | 2.8 | 1.1 | 0.7 | 0.9 | 0.7 | 1.0 | 1.0  | 1.4 | 0.9 | 0.8 |
| No iodized salt                | 0.8 | 1.0 | 2.2 | 1.2 | 2.6 | 2.3 | 1.1  | 0.9 | 1.3 | 1.4 | 1.1 | 0.9 | 0.7 | 1.0 | 0.4 | 0.6 | 0.4 | 1.0 | 1.0 | 0.9 | 0.8 | 0.5 | 1.3 | 1.0 | 1.8 | 1.0 | 1.1 | 0.9 | 0.9 | 1.0 | 1.2 | 1.0  | 1.0 | 0.8 | 1.4 |
| Unsafe water                   | 0.9 | 1.1 | 1.1 | 0.9 | 0.6 | 1.0 | 0.9  | 1.1 | 0.8 | 1.0 | 0.8 | 1.0 | 1.1 | 0.5 | 1.2 | 0.7 | 0.9 | 1.2 | 0.9 | 1.2 | 1.2 | 1.3 | 1.2 | 0.9 | 0.7 | 0.9 | 1.7 | 1.1 | 0.8 | 0.8 | 1.0 | 1.0  | 1.1 | 1.0 | 1.0 |
| No care seeking for susp pneu  | 1.0 | 1.0 | 1.3 | 1.0 | 1.1 | 1.2 | 1.0  | 1.6 | 0.5 | 1.0 | 1.1 | 0.9 | 1.0 | 0.4 | 0.6 | 1.7 | 0.8 | 0.9 | 1.5 | 1.4 | 0.8 | 5.8 | 1.0 | 0.6 | 1.0 | 1.0 | 1.5 | 0.7 | 1.0 | 1.0 | 1.0 | 0.8  | 0.9 | 1.0 | 1.4 |

Label: odds ratios

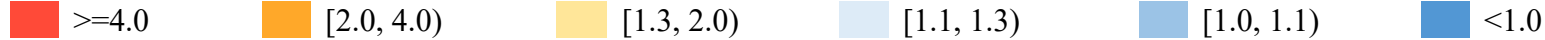

**D) Underweight, children living in urban areas, total n=81,347**

|                                | BJ  | BF  | BI   | CM   | CI   | CD  | ET   | GM  | GH  | GN  | HT   | IN  | KE  | KG  | KM   | LS   | LR   | MW   | ML  | MZ   | MM  | NA   | NP  | NE  | PE   | ST   | SL   | SZ  | TD  | TJ  | TZ  | TG  | UG   | ZM  | ZW  |
|--------------------------------|-----|-----|------|------|------|-----|------|-----|-----|-----|------|-----|-----|-----|------|------|------|------|-----|------|-----|------|-----|-----|------|------|------|-----|-----|-----|-----|-----|------|-----|-----|
| Short maternal stature         | 3.0 | 1.0 | 14.5 | 1.0  | 10.4 | 0.8 | 0.2  | 1.0 | 1.0 | 1.0 | 35.4 | 3.4 | 0.6 | 1.0 | 0.3  | 1.0  | 40.4 | 1.0  | 0.1 | 6.9  | 4.5 | 1.0  | 2.8 | 3.5 | 10.7 | 6.3  | 1.5  | 1.0 | 2.6 | 1.0 | 1.7 | 5.0 | 7.0  | 6.2 | 1.0 |
| Lack of maternal education     | 2.1 | 1.7 | 0.2  | 3.5  | 1.0  | 1.4 | 2.0  | 1.1 | 8.0 | 1.2 | 0.9  | 1.8 | 1.1 | 2.4 | 13.3 | 1.0  | 0.7  | 0.5  | 3.8 | 2.3  | 0.3 | 3.4  | 0.9 | 1.4 | 1.7  | 2.0  | 1.2  | 1.0 | 1.5 | 1.0 | 2.3 | 2.5 | 12.3 | 1.7 | 1.0 |
| Poorest HH wealth              | 1.6 | 1.9 | 3.1  | 1.0  | 1.0  | 2.7 | 1.2  | 0.5 | 1.7 | 6.6 | 0.5  | 1.6 | 2.9 | 1.0 | 0.2  | 1.0  | 1.1  | 0.9  | 0.6 | 1.2  | 0.3 | 1.0  | 1.1 | 0.3 | 12.9 | 26.4 | 0.5  | 1.0 | 2.4 | 0.3 | 1.8 | 4.0 | 4.9  | 2.8 | 1.0 |
| Low maternal BMI               | 4.7 | 2.7 | 8.9  | 13.4 | 6.4  | 7.4 | 22.0 | 2.1 | 1.2 | 1.2 | 9.9  | 2.4 | 3.3 | 5.1 | 5.1  | 1.0  | 8.5  | 39.7 | 2.3 | 10.9 | 7.5 | 8.9  | 3.6 | 1.8 | 14.4 | 9.5  | 3.1  | 1.0 | 3.5 | 1.4 | 2.9 | 7.8 | 3.5  | 2.3 | 5.4 |
| Poor dietary diversity         | 1.4 | 2.5 | 3.3  | 8.0  | 0.7  | 1.0 | 0.8  | 1.8 | 0.8 | 5.0 | 0.0  | 1.3 | 1.7 | 2.8 | 0.4  | 1.0  | 8.4  | 0.1  | 0.6 | 1.8  | 0.8 | 5.1  | 0.7 | 0.9 | 0.7  | 0.4  | 0.1  | 1.0 | 1.7 | 1.4 | 2.1 | 2.4 | 0.1  | 0.8 | 0.2 |
| No SBA                         | 1.3 | 1.7 | 2.3  | 1.3  | 0.9  | 1.1 | 1.1  | 1.2 | 0.8 | 2.0 | 1.2  | 1.2 | 1.0 | 1.0 | 2.4  | 12.2 | 1.4  | 7.9  | 1.0 | 0.8  | 1.4 | 4.3  | 1.0 | 1.1 | 1.6  | 0.8  | 0.7  | 0.0 | 1.2 | 1.1 | 0.5 | 1.2 | 3.1  | 1.0 | 1.2 |
| Less than four ANC visits      | 1.3 | 0.1 | 0.8  | 0.6  | 0.4  | 0.2 | 2.2  | 1.5 | 1.8 | 2.8 | 2.6  | 1.2 | 1.1 | 1.0 | 2.3  | 29.5 | 2.4  | 0.1  | 1.3 | 5.0  | 2.1 | 0.0  | 1.1 | 1.0 | 1.4  | 0.3  | 1.9  | 1.0 | 1.4 | 2.3 | 1.6 | 5.7 | 1.0  | 1.8 | 0.4 |
| Unimproved sanitation          | 1.0 | 1.1 | 0.6  | 1.0  | 1.6  | 0.7 | 1.2  | 1.4 | 0.9 | 1.1 | 1.7  | 1.0 | 1.1 | 1.0 | 1.1  | 0.1  | 1.3  | 0.6  | 1.1 | 1.0  | 1.9 | 1.6  | 1.5 | 0.9 | 1.3  | 0.5  | 2.5  | 1.0 | 1.0 | 8.8 | 1.2 | 0.7 | 0.2  | 1.0 | 0.3 |
| Had diarrhea, but not used ORT | 0.9 | 1.4 | 6.2  | 1.8  | 0.5  | 0.6 | 8.8  | 0.6 | 0.9 | 8.7 | 0.5  | 1.0 | 1.9 | 1.0 | 1.5  | 0.0  | 3.3  | 1.3  | 0.9 | 1.2  | 0.1 | 1.0  | 0.5 | 0.4 | 1.8  | 2.0  | 13.7 | 1.0 | 1.3 | 1.3 | 0.6 | 0.5 | 0.2  | 0.7 | 0.2 |
| Unsafe stool disposal          | 0.8 | 1.6 | 1.8  | 0.9  | 0.6  | 0.9 | 3.0  | 0.8 | 1.7 | 0.6 | 5.0  | 1.1 | 1.9 | 1.4 | 1.4  | 7.0  | 1.2  | 16.7 | 2.0 | 1.7  | 0.7 | 1.3  | 1.3 | 1.6 | 1.0  | 1.3  | 5.1  | 1.0 | 1.1 | 1.2 | 0.9 | 0.6 | 1.2  | 0.8 | 0.6 |
| High indoor pollution          | 1.0 | 2.6 | 1.0  | 1.1  | 1.5  | 1.0 | 1.2  | 0.9 | 0.9 | 4.1 | 8.2  | 1.0 | 2.1 | 0.8 | 0.6  | 17.0 | 1.0  | 1.0  | 3.3 | 0.9  | 1.2 | 5.2  | 1.3 | 1.1 | 1.4  | 0.2  | 1.0  | 1.0 | 1.2 | 1.0 | 2.9 | 3.6 | 1.0  | 1.7 | 1.3 |
| Not fully vaccinated           | 1.0 | 1.0 | 2.0  | 2.6  | 2.4  | 1.0 | 1.9  | 0.5 | 0.7 | 1.1 | 1.2  | 1.0 | 1.5 | 0.1 | 2.2  | 0.1  | 0.9  | 0.7  | 1.5 | 0.6  | 1.6 | 1.3  | 0.8 | 1.0 | 0.7  | 0.9  | 1.8  | 0.0 | 0.9 | 0.5 | 1.3 | 1.1 | 0.4  | 0.9 | 0.5 |
| Infectious disease             | 1.3 | 1.0 | 0.4  | 2.1  | 3.4  | 2.1 | 0.2  | 0.6 | 2.4 | 0.4 | 0.2  | 1.0 | 0.9 | 0.0 | 1.6  | 17.8 | 0.9  | 4.5  | 1.3 | 1.6  | 2.2 | 0.1  | 1.8 | 2.2 | 1.4  | 0.8  | 1.7  | 0.0 | 1.0 | 0.9 | 1.1 | 3.0 | 5.6  | 1.5 | 1.1 |
| Child marriage                 | 0.9 | 1.2 | 1.0  | 1.7  | 0.4  | 1.1 | 1.5  | 1.0 | 0.6 | 1.1 | 0.7  | 1.0 | 1.2 | 0.2 | 0.8  | 0.0  | 0.7  | 0.4  | 1.0 | 0.9  | 1.8 | 0.8  | 1.1 | 1.4 | 0.8  | 3.3  | 0.8  | 1.0 | 0.9 | 0.6 | 0.8 | 1.8 | 0.5  | 1.0 | 1.9 |
| Delayed breastfeeding          | 1.1 | 0.7 | 0.5  | 0.7  | 0.5  | 1.0 | 0.5  | 1.3 | 0.6 | 0.4 | 1.8  | 1.0 | 1.0 | 1.4 | 1.9  | 10.4 | 1.4  | 1.1  | 1.1 | 0.7  | 1.0 | 3.0  | 0.9 | 0.9 | 0.9  | 1.9  | 1.4  | 1.0 | 0.8 | 1.2 | 0.9 | 0.5 | 0.4  | 1.3 | 1.3 |
| FP need unsatisfied            | 1.1 | 0.8 | 1.0  | 0.8  | 1.9  | 1.0 | 3.5  | 0.9 | 0.6 | 2.1 | 1.3  | 1.0 | 1.2 | 1.8 | 1.5  | 1.3  | 1.8  | 12.0 | 0.8 | 1.4  | 0.5 | 0.2  | 1.0 | 1.5 | 1.2  | 0.4  | 1.5  | 0.0 | 1.2 | 1.3 | 1.1 | 1.2 | 0.2  | 0.9 | 2.9 |
| No vit A supplement            | 1.1 | 1.3 | 2.3  | 2.0  | 0.7  | 1.2 | 0.3  | 0.6 | 1.0 | 2.6 | 0.9  | 1.0 | 1.1 | 1.8 | 1.4  | 0.5  | 1.0  | 0.3  | 1.4 | 0.3  | 1.2 | 0.9  | 1.2 | 0.8 | 1.5  | 2.2  | 1.1  | 1.0 | 0.8 | 0.8 | 0.6 | 0.7 | 0.2  | 0.6 | 0.3 |
| No iodized salt                | 1.1 | 2.1 | 0.2  | 1.7  | 0.3  | 1.1 | 3.9  | 0.5 | 1.0 | 0.9 | 3.4  | 1.0 | 1.0 | 0.5 | 3.8  | 0.4  | 0.2  | 16.1 | 0.9 | 0.7  | 1.2 | 6.3  | 0.7 | 0.7 | 1.0  | 1.3  | 3.3  | 1.0 | 0.6 | 2.1 | 2.5 | 0.7 | 0.9  | 1.2 | 2.4 |
| Unsafe water                   | 0.8 | 0.4 | 1.7  | 2.2  | 0.6  | 1.7 | 0.5  | 1.1 | 1.0 | 0.7 | 1.4  | 0.8 | 0.8 | 3.0 | 1.5  | 2.7  | 0.4  | 1.1  | 2.1 | 1.2  | 1.6 | 0.0  | 1.2 | 1.2 | 1.7  | 3.1  | 0.5  | 1.0 | 0.5 | 1.0 | 0.6 | 0.5 | 0.9  | 0.9 | 2.8 |
| No care seeking for susp pneu  | 0.9 | 0.2 | 0.8  | 1.0  | 1.6  | 1.0 | 1.0  | 0.8 | 0.6 | 1.0 | 7.2  | 0.9 | 1.0 | 1.0 | 0.6  | 1.0  | 1.2  | 1.0  | 0.8 | 1.0  | 0.3 | 15.6 | 1.2 | 0.5 | 1.0  | 1.0  | 0.2  | 1.0 | 1.0 | 1.0 | 1.0 | 0.2 | 1.0  | 1.0 | 1.0 |

Label: odds ratios



**E) Wasting, children living in rural areas, total n=218,006**

|                                | BJ   | BF  | BI   | CM  | CI   | CD  | ET  | GM  | GH  | GN  | HT  | IN  | KE  | KG   | KM  | LS  | LR  | MW  | ML  | MZ  | MM  | NA   | NP  | NE  | PE  | ST  | SL  | SZ   | TD  | TJ  | TZ  | TG  | UG   | ZM  | ZW  |
|--------------------------------|------|-----|------|-----|------|-----|-----|-----|-----|-----|-----|-----|-----|------|-----|-----|-----|-----|-----|-----|-----|------|-----|-----|-----|-----|-----|------|-----|-----|-----|-----|------|-----|-----|
| Short maternal stature         | 1.0  | 1.7 | 0.3  | 1.7 | 1.0  | 1.7 | 1.7 | 1.9 | 1.0 | 1.6 | 2.2 | 1.2 | 1.0 | 1.0  | 2.0 | 0.4 | 1.6 | 3.8 | 1.0 | 1.8 | 0.5 | 1.0  | 0.2 | 3.2 | 1.4 | 0.6 | 0.1 | 1.0  | 6.0 | 1.0 | 2.5 | 1.0 | 1.0  | 1.9 | 6.0 |
| Lack of maternal education     | 1.2  | 1.5 | 0.4  | 1.3 | 1.2  | 1.4 | 0.2 | 1.1 | 0.9 | 1.8 | 6.2 | 1.2 | 4.0 | 0.1  | 0.6 | 1.0 | 0.5 | 0.1 | 1.1 | 1.5 | 1.0 | 3.1  | 3.5 | 1.2 | 1.0 | 0.9 | 1.9 | 0.1  | 1.3 | 0.6 | 1.2 | 2.4 | 0.4  | 0.6 | 1.0 |
| Poorest HH wealth              | 0.6  | 1.0 | 1.7  | 3.7 | 1.0  | 2.1 | 1.6 | 0.9 | 0.4 | 0.1 | 0.4 | 1.2 | 9.4 | 3.3  | 3.7 | 0.2 | 1.1 | 1.3 | 1.2 | 2.1 | 1.1 | 18.3 | 0.2 | 1.7 | 0.4 | 1.0 | 0.7 | 12.8 | 1.5 | 1.6 | 1.1 | 0.5 | 17.6 | 2.9 | 1.0 |
| Low maternal BMI               | 13.0 | 3.0 | 14.9 | 1.7 | 18.7 | 1.0 | 2.2 | 1.6 | 5.9 | 2.3 | 3.2 | 2.3 | 1.7 | 2.7  | 1.4 | 5.9 | 4.4 | 4.4 | 2.6 | 1.5 | 2.0 | 2.7  | 2.6 | 2.7 | 1.0 | 2.8 | 2.1 | 1.0  | 4.0 | 4.6 | 2.4 | 5.8 | 14.1 | 1.0 | 4.1 |
| Poor dietary diversity         | 1.1  | 6.4 | 0.6  | 2.5 | 0.6  | 1.2 | 1.5 | 0.9 | 0.1 | 5.6 | 0.9 | 1.3 | 0.5 | 1.3  | 3.0 | 1.0 | 0.5 | 1.7 | 0.9 | 1.9 | 1.1 | 6.0  | 6.0 | 0.9 | 0.1 | 1.6 | 3.8 | 2.2  | 1.1 | 1.3 | 2.0 | 0.6 | 0.8  | 0.8 | 2.5 |
| No SBA                         | 1.5  | 0.8 | 1.5  | 2.5 | 0.5  | 1.6 | 1.3 | 1.5 | 1.6 | 1.8 | 1.4 | 1.0 | 1.1 | 1.0  | 0.6 | 0.9 | 1.1 | 1.4 | 1.1 | 0.4 | 1.3 | 2.2  | 1.0 | 0.8 | 0.7 | 0.8 | 1.2 | 0.0  | 1.1 | 0.9 | 2.2 | 1.3 | 1.1  | 2.1 | 0.6 |
| Less than four ANC visits      | 1.1  | 0.4 | 1.0  | 2.1 | 0.1  | 0.6 | 1.5 | 6.1 | 2.7 | 1.1 | 0.7 | 0.9 | 2.9 | 0.2  | 0.8 | 0.1 | 0.9 | 0.7 | 0.7 | 0.3 | 1.9 | 6.7  | 2.0 | 0.7 | 2.4 | 2.1 | 1.1 | 0.1  | 8.2 | 1.3 | 0.1 | 1.0 | 0.3  | 0.5 | 2.5 |
| Unimproved sanitation          | 0.8  | 0.9 | 1.1  | 1.2 | 1.9  | 0.8 | 0.7 | 1.0 | 2.6 | 1.3 | 1.5 | 1.1 | 0.6 | 2.2  | 1.5 | 1.0 | 1.5 | 0.9 | 1.2 | 0.9 | 0.9 | 0.1  | 1.2 | 1.1 | 0.7 | 1.6 | 1.6 | 1.5  | 2.7 | 1.0 | 0.8 | 1.6 | 0.9  | 1.5 | 1.3 |
| Had diarrhea, but not used ORT | 2.0  | 1.4 | 1.6  | 1.6 | 1.2  | 1.3 | 1.2 | 1.2 | 2.0 | 1.4 | 1.1 | 1.0 | 1.1 | 1.0  | 2.1 | 1.0 | 3.3 | 1.1 | 1.2 | 0.9 | 0.8 | 0.9  | 2.8 | 1.4 | 0.3 | 4.0 | 0.7 | 1.0  | 1.3 | 4.0 | 0.5 | 0.8 | 0.6  | 1.6 | 1.1 |
| Unsafe stool disposal          | 0.9  | 1.8 | 1.0  | 0.8 | 1.0  | 0.7 | 1.1 | 1.8 | 0.5 | 0.8 | 0.6 | 1.0 | 1.2 | 0.5  | 1.7 | 0.1 | 0.7 | 0.7 | 1.1 | 1.3 | 1.4 | 2.6  | 0.5 | 1.1 | 1.7 | 1.5 | 1.0 | 1.6  | 1.8 | 1.3 | 1.3 | 1.1 | 0.8  | 0.7 | 0.7 |
| High indoor pollution          | 2.0  | 0.2 | 0.6  | 1.0 | 1.0  | 1.0 | 1.0 | 0.3 | 0.3 | 1.0 | 1.0 | 1.0 | 1.6 | 0.9  | 1.0 | 0.1 | 1.0 | 1.0 | 1.5 | 0.3 | 1.0 | 0.6  | 2.4 | 1.0 | 3.6 | 1.1 | 1.0 | 2.7  | 0.2 | 1.0 | 1.0 | 1.0 | 1.0  | 0.3 | 4.8 |
| Not fully vaccinated           | 1.2  | 0.8 | 1.3  | 1.1 | 0.4  | 0.9 | 0.8 | 0.8 | 0.3 | 0.6 | 1.2 | 1.0 | 1.0 | 1.0  | 1.5 | 1.3 | 0.9 | 1.5 | 1.0 | 1.5 | 0.8 | 0.9  | 0.9 | 1.2 | 2.7 | 1.4 | 0.9 | 1.0  | 1.2 | 0.9 | 1.4 | 0.8 | 0.6  | 1.0 | 0.3 |
| Infectious disease             | 0.9  | 1.0 | 1.1  | 0.7 | 1.5  | 1.3 | 0.9 | 0.4 | 0.6 | 1.3 | 0.9 | 1.0 | 0.9 | 0.0  | 0.6 | 0.1 | 0.4 | 1.6 | 1.2 | 1.4 | 1.0 | 0.6  | 0.7 | 0.8 | 1.7 | 0.1 | 1.1 | 2.1  | 0.8 | 0.7 | 2.5 | 1.2 | 1.1  | 0.9 | 0.8 |
| Child marriage                 | 1.3  | 0.9 | 1.4  | 0.8 | 1.8  | 0.9 | 1.0 | 1.0 | 0.8 | 0.8 | 0.4 | 0.9 | 0.9 | 1.3  | 0.8 | 0.3 | 0.7 | 1.4 | 0.9 | 0.7 | 1.0 | 1.3  | 1.2 | 1.0 | 1.1 | 1.2 | 1.5 | 0.1  | 1.2 | 1.7 | 0.7 | 1.4 | 0.9  | 1.0 | 1.1 |
| Delayed breastfeeding          | 1.1  | 0.9 | 1.0  | 2.2 | 0.4  | 1.0 | 1.0 | 0.8 | 0.7 | 0.5 | 1.1 | 0.9 | 0.6 | 0.7  | 0.8 | 0.9 | 0.9 | 0.8 | 1.2 | 1.1 | 1.3 | 2.7  | 1.0 | 0.9 | 0.9 | 2.6 | 1.0 | 3.5  | 1.3 | 1.2 | 1.0 | 1.3 | 1.1  | 0.9 | 0.9 |
| FP need unsatisfied            | 0.8  | 1.3 | 0.9  | 1.1 | 0.9  | 0.8 | 0.8 | 0.8 | 3.0 | 0.7 | 1.2 | 1.0 | 0.8 | 0.6  | 1.4 | 0.0 | 1.0 | 0.8 | 0.8 | 0.7 | 0.8 | 0.2  | 1.0 | 0.9 | 2.0 | 1.0 | 1.1 | 2.3  | 0.8 | 0.8 | 1.0 | 0.9 | 0.6  | 1.2 | 0.3 |
| No vit A supplement            | 1.5  | 1.3 | 1.0  | 0.9 | 1.0  | 1.2 | 0.9 | 1.3 | 2.6 | 0.8 | 1.0 | 1.1 | 0.9 | 1.9  | 1.1 | 3.9 | 1.3 | 0.9 | 0.8 | 1.9 | 0.5 | 0.3  | 0.6 | 1.2 | 0.2 | 7.4 | 0.7 | 14.2 | 0.9 | 1.1 | 0.8 | 1.7 | 0.8  | 1.0 | 0.6 |
| No iodized salt                | 1.2  | 0.5 | 2.3  | 0.8 | 2.3  | 1.2 | 1.1 | 0.8 | 1.0 | 1.2 | 1.0 | 1.0 | 0.5 | 1.0  | 0.4 | 0.1 | 4.6 | 3.6 | 0.9 | 0.9 | 0.8 | 0.4  | 1.6 | 0.8 | 0.7 | 5.2 | 0.6 | 3.4  | 0.7 | 1.4 | 1.1 | 1.0 | 2.4  | 2.1 | 1.5 |
| Unsafe water                   | 1.2  | 0.9 | 1.6  | 0.7 | 0.8  | 0.8 | 1.1 | 1.8 | 1.3 | 0.8 | 0.7 | 1.2 | 1.1 | 0.7  | 1.0 | 1.1 | 0.8 | 1.5 | 0.7 | 0.9 | 1.2 | 0.8  | 0.8 | 1.0 | 1.4 | 0.7 | 1.5 | 0.6  | 0.8 | 0.9 | 1.0 | 1.1 | 1.5  | 1.1 | 1.1 |
| No care seeking for susp pneu  | 2.0  | 1.4 | 1.2  | 1.0 | 1.3  | 0.9 | 1.0 | 2.4 | 2.2 | 1.0 | 0.9 | 0.9 | 1.0 | 26.7 | 1.3 | 1.5 | 2.5 | 0.9 | 1.4 | 1.0 | 1.1 | 5.6  | 6.6 | 1.0 | 1.0 | 1.0 | 1.6 | 0.5  | 1.0 | 1.0 | 1.0 | 1.0 | 1.2  | 1.0 | 0.8 |

Label: odds ratios



**F) Wasting, children living in urban areas, total n=81,347**

|                                | BJ  | BF  | BI   | CM  | CI  | CD  | ET   | GM   | GH   | GN  | HT   | IN  | KE  | KG   | KM  | LS | LR   | MW   | ML   | MZ  | MM  | NA  | NP  | NE  | PE   | ST  | SL   | SZ | TD  | TJ  | TZ  | TG  | UG   | ZM  | ZW  |
|--------------------------------|-----|-----|------|-----|-----|-----|------|------|------|-----|------|-----|-----|------|-----|----|------|------|------|-----|-----|-----|-----|-----|------|-----|------|----|-----|-----|-----|-----|------|-----|-----|
| Short maternal stature         | 8.2 | 1.0 | 13.4 | 1.0 | 1.0 | 1.5 | 0.0  | 1.0  | 1.0  | 1.0 | 1.0  | 1.1 | 1.0 | 1.0  | 0.4 | NA | 1.0  | 1.0  | 0.3  | 8.8 | 0.8 | 1.0 | 0.5 | 4.6 | 6.9  | 1.0 | 0.7  | NA | 0.0 | 1.0 | 1.0 | 7.2 | 1.0  | 0.3 | 1.0 |
| Lack of maternal education     | 0.7 | 1.5 | 0.1  | 3.3 | 2.4 | 0.4 | 2.2  | 1.3  | 49.0 | 1.2 | 0.1  | 1.2 | 3.3 | 2.3  | 4.5 | NA | 0.7  | 1.0  | 1.7  | 1.2 | 0.4 | 1.0 | 1.5 | 0.9 | 1.0  | 3.9 | 3.9  | NA | 2.2 | 1.0 | 4.3 | 2.6 | 1.0  | 0.6 | 1.0 |
| Poorest HH wealth              | 0.2 | 2.5 | 1.0  | 1.0 | 1.0 | 1.0 | 2.8  | 0.4  | 0.5  | 1.0 | 45.9 | 1.0 | 1.4 | 1.0  | 0.4 | NA | 7.2  | 37.5 | 16.3 | 2.7 | 1.6 | 1.0 | 1.4 | 1.0 | 0.7  | 0.6 | 0.3  | NA | 1.4 | 1.0 | 0.5 | 1.0 | 0.0  | 0.7 | 1.0 |
| Low maternal BMI               | 4.6 | 1.8 | 35.1 | 3.6 | 2.0 | 4.6 | 10.9 | 10.5 | 0.4  | 1.1 | 1.1  | 2.2 | 2.2 | 5.0  | 0.8 | NA | 1.0  | 1.6  | 1.2  | 6.3 | 4.1 | 1.0 | 2.4 | 2.6 | 16.8 | 0.3 | 3.2  | NA | 6.4 | 1.9 | 1.4 | 2.9 | 0.4  | 1.9 | 9.9 |
| Poor dietary diversity         | 1.1 | 3.0 | 1.0  | 3.0 | 0.5 | 0.7 | 8.0  | 5.0  | 1.0  | 3.7 | 1.0  | 1.1 | 2.1 | 0.3  | 2.1 | NA | 1.0  | 17.6 | 0.5  | 1.1 | 4.2 | 1.0 | 0.9 | 1.8 | 9.3  | 0.7 | 0.3  | NA | 1.4 | 0.5 | 0.3 | 0.5 | 0.1  | 1.6 | 1.0 |
| No SBA                         | 0.9 | 2.9 | 1.9  | 1.9 | 0.6 | 2.3 | 1.5  | 0.1  | 1.8  | 1.3 | 0.6  | 1.0 | 1.8 | 1.0  | 1.4 | NA | 1.5  | 0.3  | 0.4  | 1.2 | 0.3 | 1.0 | 1.0 | 1.8 | 2.2  | 2.7 | 0.7  | NA | 1.0 | 1.1 | 0.9 | 1.1 | 6.7  | 1.4 | 0.6 |
| Less than four ANC visits      | 0.5 | 0.0 | 0.2  | 0.2 | 0.1 | 0.9 | 5.4  | 46.6 | 45.5 | 5.6 | 2.3  | 1.0 | 1.3 | 0.8  | 0.8 | NA | 3.9  | 1.0  | 0.8  | 0.3 | 0.7 | 1.0 | 0.7 | 1.2 | 1.0  | 6.9 | 2.2  | NA | 1.0 | 5.2 | 1.3 | 0.2 | 49.0 | 2.3 | 0.5 |
| Unimproved sanitation          | 1.4 | 0.9 | 0.1  | 2.3 | 0.5 | 0.6 | 1.1  | 0.6  | 1.2  | 0.5 | 1.3  | 1.2 | 1.1 | 1.0  | 1.3 | NA | 0.2  | 0.1  | 2.2  | 0.8 | 0.7 | 1.0 | 2.4 | 1.5 | 2.0  | 1.8 | 1.1  | NA | 1.5 | 1.0 | 0.8 | 1.0 | 4.7  | 0.8 | 0.2 |
| Had diarrhea, but not used ORT | 0.9 | 1.3 | 14.8 | 0.7 | 0.2 | 0.2 | 10.0 | 0.3  | 5.7  | 1.7 | 0.3  | 1.1 | 5.0 | 1.0  | 2.1 | NA | 0.7  | 2.6  | 0.5  | 1.0 | 1.0 | 1.0 | 0.8 | 0.9 | 2.8  | 0.3 | 13.8 | NA | 1.4 | 0.6 | 0.2 | 1.5 | 1.0  | 0.5 | 1.0 |
| Unsafe stool disposal          | 0.6 | 1.8 | 9.8  | 0.6 | 0.9 | 1.0 | 4.8  | 0.8  | 1.7  | 0.3 | 9.3  | 1.0 | 2.6 | 0.9  | 0.9 | NA | 1.2  | 1.0  | 1.0  | 1.3 | 1.2 | 1.0 | 2.3 | 3.0 | 0.3  | 1.4 | 6.5  | NA | 0.8 | 1.4 | 1.5 | 0.2 | 1.4  | 1.5 | 0.2 |
| High indoor pollution          | 2.6 | 0.7 | 1.0  | 0.4 | 2.1 | 1.0 | 2.8  | 0.7  | 0.7  | 1.0 | 0.4  | 1.0 | 1.1 | 1.0  | 0.6 | NA | 1.0  | 0.0  | 15.9 | 0.5 | 0.7 | 0.0 | 1.0 | 2.2 | 1.2  | 0.7 | 1.0  | NA | 1.7 | 1.0 | 2.8 | 0.5 | 0.0  | 1.0 | 1.4 |
| Not fully vaccinated           | 1.5 | 0.8 | 0.6  | 6.8 | 1.3 | 1.3 | 1.4  | 1.0  | 0.7  | 1.4 | 1.2  | 1.0 | 1.3 | 3.7  | 1.1 | NA | 0.8  | 0.9  | 0.6  | 1.1 | 2.0 | 0.0 | 0.8 | 0.5 | 1.5  | 1.2 | 1.5  | NA | 1.1 | 1.2 | 2.4 | 2.1 | 0.0  | 1.1 | 4.4 |
| Infectious disease             | 2.1 | 1.2 | 0.8  | 4.0 | 3.9 | 1.3 | 0.4  | 2.2  | 0.0  | 0.2 | 1.3  | 1.0 | 0.4 | 0.0  | 1.3 | NA | 1.0  | 42.4 | 2.1  | 0.9 | 1.0 | 0.0 | 2.9 | 1.5 | 1.0  | 2.1 | 1.2  | NA | 1.4 | 0.5 | 0.5 | 0.8 | 0.0  | 1.2 | 1.2 |
| Child marriage                 | 0.8 | 1.0 | 0.1  | 0.7 | 1.0 | 1.1 | 2.5  | 0.8  | 1.1  | 1.0 | 1.2  | 1.0 | 0.7 | 0.8  | 0.7 | NA | 0.5  | 0.0  | 0.7  | 0.8 | 1.1 | 0.0 | 0.6 | 0.7 | 1.3  | 1.2 | 0.7  | NA | 0.7 | 0.7 | 0.6 | 2.5 | 0.0  | 1.5 | 1.6 |
| Delayed breastfeeding          | 0.9 | 0.8 | 1.2  | 0.7 | 0.7 | 0.7 | 0.5  | 1.9  | 0.6  | 0.5 | 2.2  | 1.0 | 1.7 | 0.4  | 0.6 | NA | 2.6  | 0.1  | 1.0  | 0.7 | 1.2 | 1.0 | 1.0 | 0.5 | 1.8  | 1.3 | 0.7  | NA | 0.9 | 2.1 | 3.1 | 0.8 | 0.0  | 1.1 | 0.2 |
| FP need unsatisfied            | 1.4 | 0.8 | 10.9 | 1.2 | 0.9 | 1.0 | 0.5  | 0.7  | 0.1  | 1.0 | 0.9  | 1.0 | 1.0 | 3.0  | 1.5 | NA | 2.0  | 1.0  | 1.3  | 0.6 | 0.3 | 1.0 | 0.9 | 2.0 | 1.0  | 1.0 | 2.2  | NA | 0.9 | 1.2 | 1.4 | 0.5 | 0.0  | 0.9 | 0.2 |
| No vit A supplement            | 0.9 | 1.0 | 1.0  | 1.0 | 0.4 | 1.0 | 0.1  | 1.0  | 1.3  | 2.4 | 6.3  | 1.0 | 2.9 | 3.0  | 1.4 | NA | 1.7  | 2.3  | 1.1  | 0.7 | 0.5 | 1.0 | 0.4 | 1.8 | 1.5  | 2.1 | 1.1  | NA | 0.9 | 0.6 | 3.6 | 0.5 | 31.1 | 1.4 | 0.3 |
| No iodized salt                | 1.6 | 3.9 | 1.0  | 0.9 | 0.3 | 0.4 | 2.3  | 0.7  | 1.1  | 1.3 | 3.4  | 1.0 | 0.6 | 1.0  | 0.8 | NA | 0.0  | 44.8 | 1.0  | 1.1 | 1.6 | 1.0 | 2.4 | 1.4 | 0.5  | 4.0 | 3.9  | NA | 0.7 | 3.7 | 1.3 | 0.8 | 1.0  | 1.1 | 3.2 |
| Unsafe water                   | 1.0 | 0.8 | 1.0  | 0.6 | 2.3 | 2.1 | 0.3  | 1.0  | 0.8  | 0.9 | 2.5  | 0.8 | 0.7 | 24.2 | 1.4 | NA | 0.4  | 1.0  | 0.5  | 0.4 | 0.9 | 1.0 | 1.6 | 1.3 | 3.5  | 1.0 | 0.3  | NA | 0.8 | 1.0 | 2.6 | 1.3 | 0.0  | 0.9 | 0.5 |
| No care seeking for susp pneu  | 1.0 | 0.7 | 0.3  | 1.0 | 1.7 | 0.9 | 1.0  | 0.9  | 10.9 | 1.0 | 0.3  | 0.8 | 1.0 | 1.0  | 0.7 | NA | 10.3 | 1.0  | 0.6  | 0.6 | 2.1 | 1.0 | 0.4 | 0.5 | 1.0  | 1.0 | 0.7  | NA | 1.0 | 1.0 | 1.0 | 0.5 | 1.0  | 1.0 | 2.9 |

Label: odds ratios

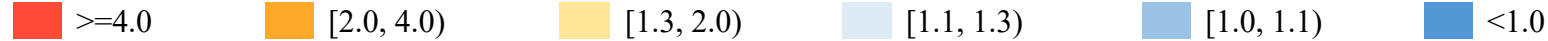

**eFigure 16. Relative Ranking of 17 Factors Associated With Child Anthropometric Failures From Fully Adjusted Models for the Pooled Sample, Excluding Source of Drinking Water, Sanitation Facility, and Household Air Quality**

**A) stunting, B) underweight, and C) wasting, odds ratio (OR) and 95% confidence interval (CI)**

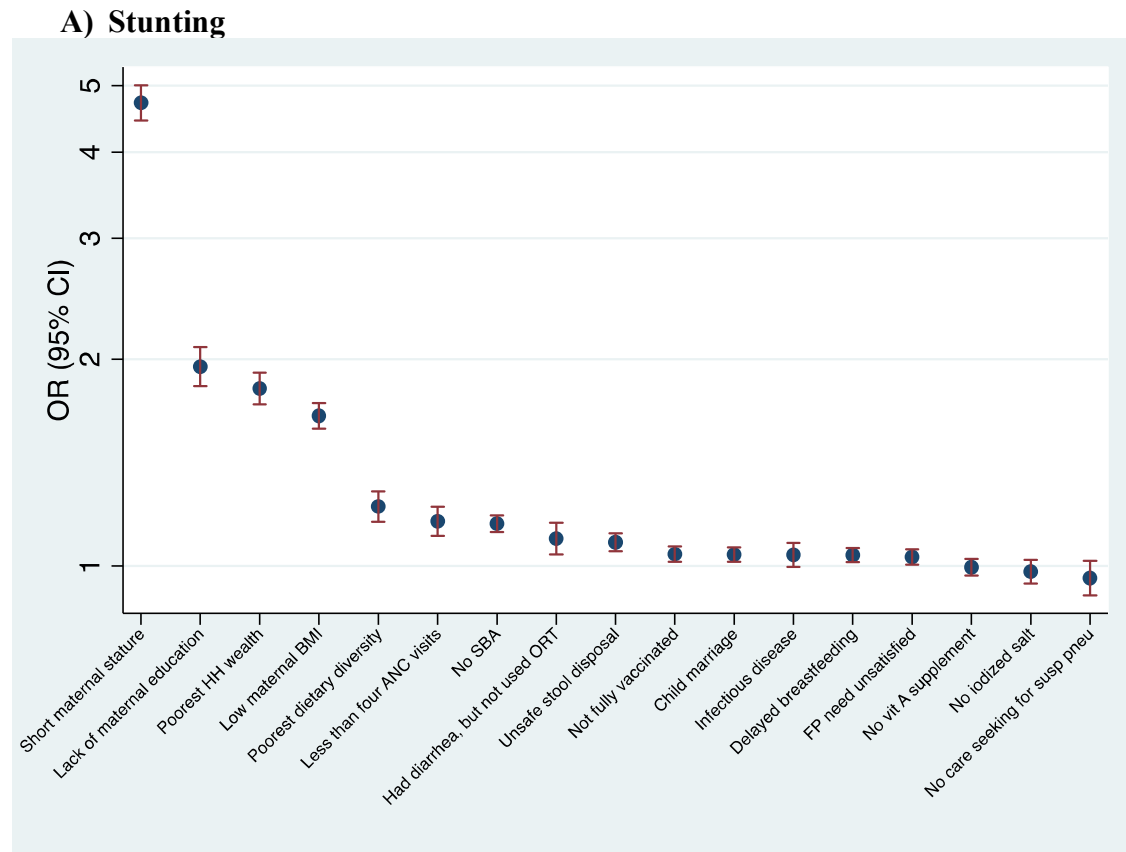

**Note:**

1. We use logarithmic scale for the y axis.
2. Short maternal stature: maternal height <145cm; low maternal BMI: maternal BMI <18.5 kg/m<sup>2</sup>; child marriage: mother's age at marriage <18 years old; delayed breastfeeding: child was not initially breastfed within one hour after born; infectious disease: child was caught by infectious diseases two weeks prior to the survey.
3. Abbreviations - HH: household, BMI: body mass index; SBA: skilled birth attendant; ANC: antenatal care; ORT: oral rehydration therapy; FP: family planning; vit: vitamin; susp pneu: suspected pneumonia.



## B) Underweight

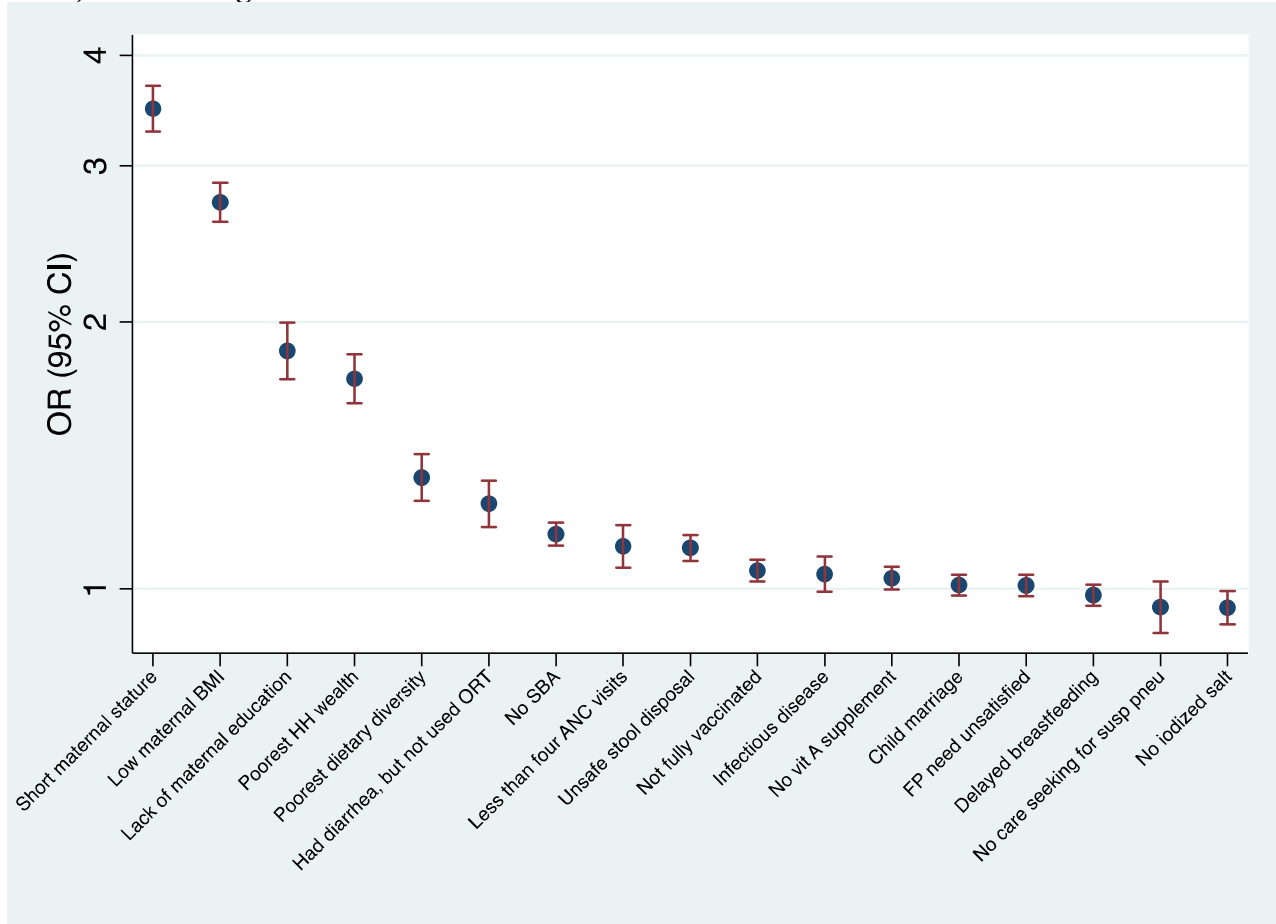

### C) Wasting

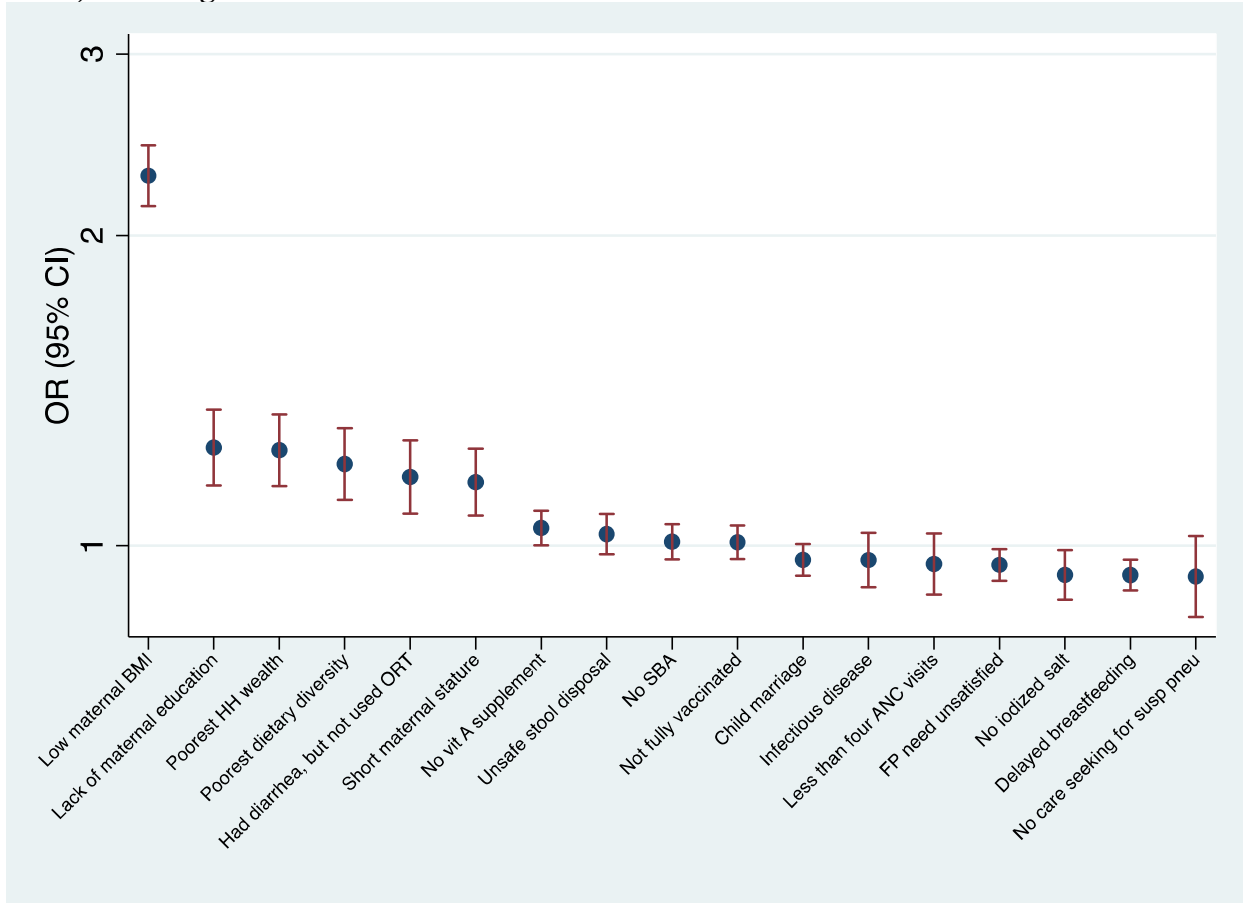

**eFigure 17. Country-Specific Ranking of 17 Factors Associated With Child Anthropometric Failures From Fully Adjusted Models for the Pooled Sample, Excluding Source of Drinking Water, Sanitation Facility, and Household Air Quality**  
**A) stunting, B) underweight, and C) wasting**

**A) Stunting, children 12-59 months old, total n=299,353**

|                                | BJ | BF | BI | CM | CI | CD | ET | GM | GH | GN | HT | IN | KE | KG | KM | LS | LR | MW | ML | MZ | MM | NA | NP | NE | PE | ST | SL | SZ | TD | TJ | TZ | TG | UG | ZM | ZW |
|--------------------------------|----|----|----|----|----|----|----|----|----|----|----|----|----|----|----|----|----|----|----|----|----|----|----|----|----|----|----|----|----|----|----|----|----|----|----|
| Short maternal stature         | 1  | 2  | 1  | 3  | 2  | 1  | 1  | 2  | 1  | 17 | 1  | 1  | 1  | 1  | 4  | 5  | 1  | 1  | 8  | 1  | 1  | 2  | 1  | 3  | 1  | 2  | 2  | 1  | 4  | 1  | 1  | 1  | 1  | 1  | 1  |
| Lack of maternal education     | 4  | 1  | 2  | 2  | 1  | 3  | 4  | 17 | 2  | 1  | 4  | 2  | 5  | 13 | 1  | 2  | 4  | 2  | 2  | 2  | 9  | 5  | 4  | 1  | 3  | 12 | 1  | 2  | 1  | 6  | 4  | 2  | 2  | 4  | 2  |
| Poorest HH wealth              | 3  | 3  | 3  | 1  | 4  | 2  | 2  | 1  | 4  | 2  | 2  | 4  | 2  | 8  | 6  | 1  | 2  | 4  | 1  | 3  | 4  | 1  | 2  | 14 | 2  | 1  | 3  | 4  | 13 | 7  | 2  | 3  | 4  | 2  | 3  |
| Low maternal BMI               | 5  | 4  | 4  | 5  | 3  | 4  | 5  | 8  | 6  | 15 | 3  | 3  | 3  | 2  | 2  | 4  | 3  | 3  | 3  | 4  | 2  | 4  | 3  | 4  | 4  | 6  | 4  | 3  | 2  | 4  | 3  | 4  | 5  | 3  | 4  |
| Poor dietary diversity         | 16 | 5  | 9  | 4  | 15 | 6  | 3  | 12 | 13 | 4  | 13 | 5  | 10 | 7  | 17 | 12 | 5  | 13 | 4  | 6  | 17 | 15 | 16 | 2  | 7  | 5  | 11 | 17 | 6  | 2  | 5  | 6  | 6  | 11 | 11 |
| No SBA                         | 6  | 6  | 7  | 14 | 16 | 14 | 10 | 7  | 3  | 7  | 7  | 9  | 4  | 3  | 12 | 7  | 14 | 8  | 11 | 8  | 3  | 10 | 9  | 12 | 5  | 11 | 13 | 6  | 5  | 8  | 8  | 11 | 8  | 6  | 7  |
| Less than four ANC visits      | 2  | 17 | 17 | 7  | 6  | 17 | 15 | 3  | 8  | 3  | 5  | 6  | 6  | 15 | 9  | 6  | 11 | 17 | 5  | 5  | 5  | 9  | 8  | 5  | 17 | 15 | 10 | 14 | 3  | 9  | 17 | 5  | 3  | 14 | 5  |
| Had diarrhea, but not used ORT | 7  | 11 | 13 | 10 | 17 | 11 | 9  | 13 | 17 | 5  | 11 | 8  | 9  | 16 | 3  | 3  | 8  | 6  | 6  | 9  | 16 | 3  | 17 | 16 | 13 | 14 | 17 | 5  | 7  | 3  | 6  | 16 | 12 | 8  | 17 |
| Unsafe stool disposal          | 13 | 7  | 6  | 8  | 7  | 10 | 17 | 6  | 7  | 9  | 8  | 7  | 15 | 10 | 16 | 13 | 13 | 10 | 7  | 15 | 8  | 7  | 5  | 8  | 8  | 7  | 15 | 15 | 8  | 5  | 9  | 8  | 7  | 15 | 10 |
| Not fully vaccinated           | 12 | 8  | 5  | 13 | 9  | 16 | 13 | 5  | 5  | 12 | 12 | 13 | 12 | 9  | 5  | 14 | 12 | 11 | 16 | 13 | 12 | 6  | 13 | 11 | 12 | 4  | 8  | 7  | 12 | 16 | 11 | 7  | 16 | 13 | 8  |
| Infectious disease             | 10 | 9  | 11 | 12 | 12 | 12 | 6  | 14 | 9  | 8  | 16 | 11 | 14 | 4  | 11 | 17 | 10 | 16 | 17 | 7  | 13 | 8  | 6  | 6  | 15 | 3  | 14 | 16 | 10 | 15 | 14 | 14 | 15 | 7  | 6  |
| Child marriage                 | 9  | 14 | 10 | 17 | 11 | 8  | 14 | 9  | 10 | 14 | 15 | 10 | 8  | 11 | 10 | 11 | 15 | 14 | 14 | 10 | 6  | 16 | 11 | 9  | 10 | 8  | 12 | 12 | 15 | 14 | 16 | 10 | 14 | 5  | 9  |
| Delayed breastfeeding          | 11 | 13 | 12 | 16 | 14 | 9  | 8  | 10 | 14 | 16 | 10 | 12 | 7  | 6  | 14 | 10 | 6  | 5  | 15 | 14 | 14 | 11 | 12 | 10 | 14 | 10 | 7  | 13 | 17 | 12 | 13 | 12 | 11 | 10 | 13 |
| FP need unsatisfied            | 8  | 12 | 15 | 11 | 13 | 13 | 7  | 4  | 15 | 13 | 9  | 14 | 16 | 5  | 8  | 15 | 9  | 7  | 13 | 11 | 10 | 12 | 10 | 13 | 9  | 16 | 6  | 11 | 9  | 11 | 12 | 13 | 9  | 9  | 12 |
| No vit A supplement            | 17 | 16 | 8  | 9  | 8  | 5  | 16 | 11 | 12 | 6  | 17 | 15 | 17 | 12 | 15 | 16 | 7  | 12 | 10 | 16 | 7  | 13 | 7  | 7  | 6  | 9  | 9  | 9  | 16 | 17 | 15 | 9  | 13 | 16 | 14 |
| No iodized salt                | 15 | 15 | 16 | 6  | 5  | 15 | 12 | 16 | 11 | 10 | 14 | 16 | 13 | 14 | 7  | 9  | 17 | 15 | 12 | 12 | 11 | 17 | 15 | 15 | 16 | 17 | 5  | 8  | 11 | 13 | 7  | 17 | 10 | 17 | 16 |
| No care seeking for susp pneu  | 14 | 10 | 14 | 15 | 10 | 7  | 11 | 15 | 16 | 11 | 6  | 17 | 11 | 17 | 13 | 8  | 16 | 9  | 9  | 17 | 15 | 14 | 14 | 17 | 11 | 13 | 16 | 10 | 14 | 10 | 10 | 15 | 17 | 12 | 15 |

**Label:**  
■ Rank 1<sup>st</sup>    ■ Rank 2<sup>nd</sup>    ■ Rank 3<sup>rd</sup>-4<sup>th</sup>    ■ Rank 5<sup>th</sup>-7<sup>th</sup>    ■ Rank 8<sup>th</sup>-12<sup>nd</sup>    ■ Rank 13<sup>th</sup>-17<sup>th</sup>

- Note:**
1. BJ= Benin, BF= Burkina Faso, BI= Burundi, CM=Cameroon, CI=Côte d'Ivoire, CD=The Democratic Republic of the Congo, ET=Ethiopia, GM=Gambia, GH=Ghana, GN=Guinea, HT=Haiti, IN=India, KE=Kenya, KG=Kyrgyzstan, KM=Comoros, LS=Lesotho, LR=Liberia, MW=Malawi, ML=Mali, MZ=Mozambique, MM=Myanmar, NA=Namibia, NP=Nepal, NE=Niger, PE=Peru, ST= São Tomé and Príncipe, SL=Sierra Leone, SZ=Swaziland, TD=Chad, TJ=Tajikistan, TZ=Tanzania, TG=Togo, UG=Uganda, ZM=Zambia, ZW=Zimbabwe.
  2. Short maternal stature: maternal height <145cm; low maternal BMI: maternal BMI <18.5 kg/m<sup>2</sup>; child marriage: mother's age at marriage <18 years old; delayed breastfeeding: child was not initially breastfed within one hour after born; infectious disease: child was caught by infectious diseases two weeks prior to the survey.
  3. Abbreviations - HH: household, BMI: body mass index; SBA: skilled birth attendant; ANC: antenatal care; ORT: oral rehydration therapy; FP: family planning; vit: vitamin; susp pneu: suspected pneumonia.

**B) Underweight, children 12-59 months old, total n=299,353**

|                                | BJ | BF | BI | CM | CI | CD | ET | GM | GH | GN | HT | IN | KE | KG | KM | LS | LR | MW | ML | MZ | MM | NA | NP | NE | PE | ST | SL | SZ | TD | TJ | TZ | TG | UG | ZM | ZW |   |
|--------------------------------|----|----|----|----|----|----|----|----|----|----|----|----|----|----|----|----|----|----|----|----|----|----|----|----|----|----|----|----|----|----|----|----|----|----|----|---|
| Short maternal stature         | 1  | 1  | 2  | 5  | 3  | 1  | 1  | 1  | 3  | 8  | 2  | 1  | 1  | 9  | 3  | 2  | 1  | 1  | 9  | 4  | 1  | 17 | 2  | 2  | 3  | 3  | 2  | 1  | 10 | 4  | 1  | 2  | 1  | 1  | 1  | 5 |
| Lack of maternal education     | 3  | 3  | 17 | 2  | 1  | 5  | 3  | 13 | 1  | 5  | 1  | 3  | 4  | 10 | 2  | 1  | 11 | 4  | 1  | 1  | 15 | 9  | 5  | 5  | 4  | 17 | 17 | 5  | 2  | 14 | 5  | 4  | 2  | 5  | 2  |   |
| Poorest HH wealth              | 5  | 4  | 3  | 4  | 6  | 2  | 7  | 6  | 8  | 9  | 4  | 4  | 3  | 14 | 7  | 3  | 5  | 3  | 3  | 5  | 10 | 1  | 3  | 8  | 1  | 2  | 3  | 4  | 9  | 13 | 3  | 5  | 4  | 3  | 10 |   |
| Low maternal BMI               | 2  | 2  | 1  | 1  | 2  | 3  | 2  | 3  | 2  | 1  | 3  | 2  | 2  | 1  | 1  | 5  | 2  | 2  | 2  | 2  | 2  | 5  | 1  | 1  | 2  | 1  | 1  | 2  | 1  | 1  | 2  | 3  | 3  | 2  | 1  |   |
| Poor dietary diversity         | 10 | 11 | 14 | 3  | 8  | 6  | 5  | 10 | 9  | 4  | 16 | 5  | 16 | 3  | 11 | 17 | 3  | 5  | 4  | 6  | 8  | 12 | 6  | 6  | 17 | 14 | 8  | 16 | 7  | 3  | 10 | 11 | 7  | 17 | 17 |   |
| No SBA                         | 4  | 5  | 5  | 8  | 15 | 8  | 13 | 5  | 4  | 2  | 13 | 9  | 5  | 8  | 10 | 7  | 9  | 9  | 8  | 17 | 4  | 6  | 11 | 14 | 9  | 8  | 12 | 8  | 6  | 6  | 15 | 8  | 8  | 7  | 9  |   |
| Less than four ANC visits      | 9  | 17 | 15 | 6  | 17 | 17 | 4  | 2  | 12 | 3  | 7  | 8  | 6  | 16 | 14 | 9  | 13 | 17 | 13 | 3  | 3  | 13 | 9  | 15 | 16 | 12 | 4  | 17 | 5  | 5  | 17 | 1  | 5  | 4  | 8  |   |
| Had diarrhea, but not used ORT | 8  | 10 | 6  | 7  | 12 | 12 | 6  | 4  | 16 | 6  | 9  | 6  | 7  | 7  | 6  | 4  | 4  | 6  | 6  | 7  | 17 | 3  | 17 | 10 | 7  | 4  | 6  | 3  | 4  | 2  | 11 | 7  | 12 | 13 | 15 |   |
| Unsafe stool disposal          | 16 | 6  | 10 | 11 | 7  | 9  | 9  | 9  | 6  | 13 | 11 | 7  | 8  | 4  | 8  | 10 | 8  | 7  | 7  | 10 | 6  | 4  | 7  | 3  | 11 | 11 | 14 | 11 | 8  | 7  | 7  | 12 | 6  | 15 | 12 |   |
| Not fully vaccinated           | 11 | 9  | 7  | 9  | 11 | 14 | 11 | 14 | 10 | 12 | 8  | 12 | 9  | 17 | 4  | 14 | 12 | 8  | 10 | 11 | 11 | 8  | 12 | 12 | 13 | 6  | 7  | 7  | 3  | 15 | 8  | 6  | 13 | 8  | 13 |   |
| Infectious disease             | 6  | 7  | 16 | 14 | 5  | 10 | 16 | 17 | 5  | 14 | 17 | 11 | 12 | 2  | 12 | 16 | 10 | 11 | 11 | 8  | 5  | 16 | 4  | 4  | 8  | 16 | 16 | 15 | 13 | 17 | 9  | 13 | 17 | 6  | 7  |   |
| Child marriage                 | 15 | 13 | 12 | 17 | 14 | 13 | 15 | 12 | 17 | 16 | 15 | 13 | 15 | 13 | 15 | 8  | 15 | 12 | 14 | 14 | 7  | 15 | 13 | 9  | 14 | 7  | 15 | 9  | 15 | 12 | 16 | 9  | 15 | 10 | 6  |   |
| Delayed breastfeeding          | 14 | 15 | 11 | 15 | 16 | 15 | 14 | 15 | 14 | 17 | 10 | 14 | 14 | 11 | 9  | 6  | 7  | 10 | 12 | 15 | 12 | 7  | 15 | 11 | 10 | 9  | 11 | 10 | 17 | 9  | 13 | 15 | 10 | 9  | 11 |   |
| FP need unsatisfied            | 7  | 8  | 13 | 12 | 10 | 16 | 10 | 11 | 13 | 11 | 12 | 15 | 10 | 6  | 5  | 12 | 6  | 14 | 16 | 12 | 13 | 11 | 16 | 13 | 15 | 15 | 9  | 6  | 12 | 11 | 4  | 10 | 14 | 11 | 4  |   |
| No vit A supplement            | 12 | 14 | 9  | 13 | 9  | 11 | 17 | 8  | 11 | 7  | 14 | 10 | 13 | 5  | 13 | 15 | 14 | 15 | 15 | 13 | 9  | 10 | 10 | 7  | 6  | 5  | 13 | 14 | 16 | 16 | 14 | 14 | 9  | 16 | 16 |   |
| No iodized salt                | 17 | 12 | 4  | 10 | 4  | 4  | 8  | 16 | 7  | 10 | 6  | 16 | 17 | 15 | 17 | 11 | 17 | 13 | 17 | 16 | 14 | 14 | 8  | 16 | 5  | 10 | 10 | 13 | 14 | 8  | 6  | 16 | 11 | 14 | 3  |   |
| No care seeking for susp pneu  | 13 | 16 | 8  | 16 | 13 | 7  | 12 | 7  | 15 | 15 | 5  | 17 | 11 | 12 | 16 | 13 | 16 | 16 | 5  | 9  | 16 | 2  | 14 | 17 | 12 | 13 | 5  | 12 | 11 | 10 | 12 | 17 | 16 | 12 | 14 |   |

**Label:** Rank 1<sup>st</sup> Rank 2<sup>nd</sup> Rank 3<sup>rd</sup>-4<sup>th</sup> Rank 5<sup>th</sup>-7<sup>th</sup> Rank 8<sup>th</sup>-12<sup>nd</sup> Rank 13<sup>th</sup>-17<sup>th</sup>

**C) Wasting, children 12-59 months old, total n=299,353**

|                                | BJ | BF | BI | CM | CI | CD | ET | GM | GH | GN | HT | IN | KE | KG | KM | LS | LR | MW | ML | MZ | MM | NA | NP | NE | PE | ST | SL | SZ | TD | TJ | TZ | TG | UG | ZM | ZW |
|--------------------------------|----|----|----|----|----|----|----|----|----|----|----|----|----|----|----|----|----|----|----|----|----|----|----|----|----|----|----|----|----|----|----|----|----|----|----|
| Short maternal stature         | 2  | 5  | 16 | 9  | 8  | 3  | 6  | 8  | 9  | 11 | 15 | 5  | 11 | 8  | 2  | 13 | 1  | 1  | 17 | 1  | 14 | 11 | 17 | 1  | 3  | 17 | 17 | 11 | 1  | 10 | 2  | 3  | 3  | 5  | 2  |
| Lack of maternal education     | 12 | 4  | 17 | 6  | 1  | 1  | 4  | 6  | 1  | 5  | 1  | 4  | 1  | 6  | 3  | 8  | 11 | 17 | 2  | 4  | 16 | 1  | 4  | 13 | 12 | 7  | 3  | 16 | 4  | 16 | 7  | 5  | 17 | 17 | 9  |
| Poorest HH wealth              | 17 | 13 | 3  | 1  | 5  | 4  | 3  | 17 | 15 | 16 | 4  | 2  | 2  | 7  | 4  | 6  | 8  | 15 | 5  | 2  | 6  | 3  | 15 | 3  | 2  | 14 | 13 | 2  | 14 | 17 | 15 | 2  | 2  | 2  | 4  |
| Low maternal BMI               | 1  | 2  | 1  | 4  | 2  | 6  | 1  | 2  | 3  | 3  | 2  | 1  | 5  | 2  | 9  | 7  | 3  | 3  | 1  | 3  | 1  | 7  | 1  | 2  | 1  | 10 | 1  | 1  | 2  | 1  | 1  | 1  | 1  | 6  | 1  |
| Poor dietary diversity         | 11 | 1  | 15 | 2  | 9  | 8  | 5  | 4  | 17 | 2  | 16 | 3  | 16 | 13 | 1  | 2  | 4  | 5  | 15 | 6  | 2  | 17 | 3  | 10 | 16 | 16 | 2  | 7  | 9  | 8  | 4  | 16 | 11 | 11 | 3  |
| No SBA                         | 8  | 10 | 5  | 3  | 15 | 2  | 8  | 9  | 6  | 4  | 11 | 13 | 7  | 10 | 16 | 5  | 9  | 7  | 10 | 16 | 7  | 10 | 11 | 16 | 7  | 13 | 10 | 15 | 11 | 12 | 9  | 7  | 6  | 3  | 13 |
| Less than four ANC visits      | 16 | 16 | 12 | 17 | 17 | 17 | 2  | 1  | 2  | 1  | 5  | 15 | 3  | 16 | 15 | 15 | 12 | 11 | 7  | 17 | 4  | 6  | 10 | 17 | 14 | 1  | 9  | 17 | 3  | 3  | 16 | 17 | 16 | 1  | 6  |
| Had diarrhea, but not used ORT | 4  | 6  | 4  | 7  | 13 | 9  | 7  | 11 | 5  | 6  | 12 | 8  | 4  | 9  | 5  | 9  | 5  | 9  | 9  | 13 | 15 | 8  | 7  | 5  | 6  | 8  | 4  | 10 | 6  | 2  | 17 | 11 | 15 | 7  | 14 |
| Unsafe stool disposal          | 15 | 3  | 13 | 16 | 7  | 16 | 9  | 7  | 12 | 15 | 8  | 7  | 6  | 14 | 6  | 12 | 10 | 14 | 8  | 9  | 3  | 5  | 5  | 4  | 13 | 4  | 5  | 6  | 5  | 6  | 6  | 15 | 8  | 16 | 11 |
| Not fully vaccinated           | 6  | 15 | 7  | 8  | 14 | 11 | 14 | 15 | 14 | 13 | 9  | 9  | 9  | 4  | 8  | 3  | 13 | 6  | 11 | 7  | 11 | 12 | 13 | 7  | 4  | 9  | 12 | 12 | 7  | 11 | 5  | 8  | 14 | 12 | 15 |
| Infectious disease             | 9  | 11 | 10 | 11 | 3  | 5  | 16 | 16 | 16 | 10 | 14 | 11 | 15 | 17 | 14 | 17 | 16 | 4  | 3  | 8  | 9  | 16 | 6  | 15 | 5  | 15 | 11 | 5  | 13 | 15 | 3  | 10 | 9  | 14 | 8  |
| Child marriage                 | 10 | 12 | 6  | 15 | 4  | 12 | 10 | 12 | 8  | 12 | 17 | 14 | 14 | 5  | 12 | 11 | 15 | 8  | 13 | 14 | 10 | 9  | 14 | 11 | 9  | 6  | 8  | 14 | 10 | 7  | 14 | 4  | 10 | 8  | 7  |
| Delayed breastfeeding          | 14 | 14 | 9  | 5  | 16 | 10 | 13 | 10 | 13 | 17 | 7  | 16 | 12 | 15 | 13 | 10 | 7  | 12 | 6  | 11 | 5  | 4  | 9  | 12 | 10 | 5  | 14 | 4  | 8  | 4  | 8  | 9  | 7  | 15 | 12 |
| FP need unsatisfied            | 13 | 9  | 14 | 10 | 10 | 14 | 15 | 13 | 11 | 14 | 10 | 12 | 13 | 11 | 7  | 16 | 14 | 10 | 14 | 15 | 13 | 14 | 12 | 8  | 8  | 11 | 7  | 3  | 16 | 13 | 10 | 13 | 13 | 9  | 17 |
| No vit A supplement            | 7  | 7  | 11 | 13 | 12 | 7  | 17 | 5  | 7  | 7  | 6  | 6  | 8  | 3  | 10 | 4  | 6  | 13 | 16 | 5  | 17 | 15 | 16 | 6  | 17 | 3  | 15 | 8  | 15 | 14 | 12 | 6  | 12 | 10 | 16 |
| No iodized salt                | 5  | 17 | 2  | 14 | 11 | 15 | 11 | 14 | 10 | 8  | 3  | 10 | 17 | 12 | 17 | 14 | 17 | 2  | 12 | 10 | 12 | 13 | 2  | 14 | 15 | 2  | 16 | 9  | 17 | 5  | 11 | 12 | 4  | 4  | 5  |
| No care seeking for susp pneu  | 3  | 8  | 8  | 12 | 6  | 13 | 12 | 3  | 4  | 9  | 13 | 17 | 10 | 1  | 11 | 1  | 2  | 16 | 4  | 12 | 8  | 2  | 8  | 9  | 11 | 12 | 6  | 13 | 12 | 9  | 13 | 14 | 5  | 13 | 10 |

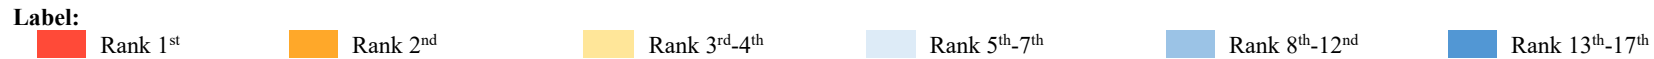

**eFigure 18. Country-Specific Odds Ratios for 17 Factors Associated With Child Anthropometric Failures From Fully Adjusted Models for the Pooled Sample, Excluding Source of Drinking Water, Sanitation Facility, and Household Air Quality**  
**A) stunting, B) underweight, and C) wasting**

**A) Stunting, children 12-59 months old, total n=299,353**

|                                | BJ  | BF  | BI  | CM  | CI   | CD  | ET  | GM  | GH  | GN  | HT   | IN  | KE  | KG  | KM  | LS   | LR  | MW  | ML  | MZ  | MM  | NA  | NP  | NE  | PE  | ST  | SL  | SZ  | TD  | TJ  | TZ  | TG   | UG   | ZM  | ZW  |
|--------------------------------|-----|-----|-----|-----|------|-----|-----|-----|-----|-----|------|-----|-----|-----|-----|------|-----|-----|-----|-----|-----|-----|-----|-----|-----|-----|-----|-----|-----|-----|-----|------|------|-----|-----|
| Short maternal stature         | 8.3 | 7.4 | 9.4 | 2.8 | 3.0  | 3.5 | 2.9 | 1.6 | 6.3 | 0.8 | 11.1 | 4.4 | 4.0 | 3.2 | 1.5 | 2.7  | 3.9 | 7.3 | 1.2 | 4.5 | 5.2 | 5.1 | 9.7 | 1.7 | 9.7 | 3.1 | 2.4 | 9.0 | 1.3 | 4.5 | 6.1 | 15.1 | 13.0 | 5.0 | 6.0 |
| Lack of maternal education     | 2.3 | 7.7 | 7.1 | 3.7 | 31.6 | 1.8 | 1.8 | 0.8 | 3.0 | 5.4 | 1.6  | 1.9 | 1.2 | 0.8 | 2.3 | 7.6  | 2.1 | 3.8 | 3.2 | 3.9 | 1.1 | 1.8 | 1.5 | 6.9 | 3.2 | 1.0 | 2.9 | 4.8 | 2.2 | 1.3 | 1.7 | 3.1  | 4.6  | 1.8 | 5.6 |
| Poorest HH wealth              | 2.4 | 2.0 | 3.0 | 4.4 | 1.9  | 2.8 | 2.2 | 1.9 | 1.8 | 1.8 | 4.3  | 1.6 | 2.8 | 1.3 | 1.3 | 11.2 | 2.3 | 1.9 | 3.5 | 2.8 | 1.4 | 6.3 | 3.1 | 0.9 | 5.7 | 4.2 | 1.6 | 2.3 | 1.0 | 1.2 | 2.4 | 2.9  | 2.0  | 2.0 | 2.6 |
| Low maternal BMI               | 1.7 | 2.0 | 2.1 | 1.8 | 2.5  | 1.6 | 1.7 | 1.0 | 1.3 | 0.9 | 1.8  | 1.6 | 1.4 | 2.8 | 2.1 | 3.5  | 2.3 | 2.5 | 2.1 | 1.8 | 1.7 | 2.1 | 1.6 | 1.6 | 2.2 | 1.9 | 1.4 | 4.7 | 1.5 | 1.6 | 1.8 | 2.4  | 1.4  | 2.0 | 2.1 |
| Poor dietary diversity         | 0.9 | 1.5 | 1.1 | 1.9 | 0.9  | 1.3 | 2.1 | 1.0 | 1.1 | 1.7 | 1.1  | 1.2 | 1.1 | 1.3 | 0.7 | 0.8  | 1.3 | 1.0 | 2.0 | 1.5 | 0.8 | 0.9 | 0.7 | 1.7 | 1.2 | 1.9 | 1.0 | 0.5 | 1.2 | 1.7 | 1.4 | 1.4  | 1.3  | 1.0 | 1.0 |
| No SBA                         | 1.3 | 1.3 | 1.2 | 1.1 | 0.8  | 1.0 | 1.0 | 1.1 | 1.8 | 1.2 | 1.1  | 1.1 | 1.3 | 1.8 | 1.0 | 1.6  | 0.9 | 1.1 | 1.2 | 1.1 | 1.5 | 1.3 | 1.0 | 1.0 | 1.6 | 1.1 | 1.0 | 1.8 | 1.2 | 1.2 | 1.0 | 1.1  | 1.1  | 1.1 | 1.2 |
| Less than four ANC visits      | 2.7 | 0.6 | 0.0 | 1.4 | 1.5  | 0.7 | 0.9 | 1.2 | 1.2 | 1.7 | 1.4  | 1.2 | 1.2 | 0.7 | 1.2 | 2.4  | 1.1 | 0.3 | 1.4 | 1.6 | 1.2 | 1.4 | 1.1 | 1.4 | 0.9 | 0.7 | 1.1 | 0.9 | 1.4 | 1.2 | 0.7 | 1.7  | 3.8  | 1.0 | 1.4 |
| Had diarrhea, but not used ORT | 1.2 | 1.1 | 1.0 | 1.1 | 0.8  | 1.1 | 1.1 | 0.9 | 0.6 | 1.3 | 1.1  | 1.1 | 1.1 | 0.6 | 1.6 | 5.9  | 1.2 | 1.3 | 1.3 | 1.1 | 0.9 | 2.6 | 0.7 | 0.8 | 1.0 | 0.8 | 0.5 | 2.1 | 1.2 | 1.6 | 1.3 | 0.9  | 0.9  | 1.0 | 0.7 |
| Unsafe stool disposal          | 1.0 | 1.2 | 1.3 | 1.3 | 1.4  | 1.2 | 0.7 | 1.2 | 1.3 | 1.1 | 1.1  | 1.1 | 0.9 | 1.1 | 0.9 | 0.8  | 1.0 | 1.1 | 1.3 | 0.8 | 1.1 | 1.7 | 1.5 | 1.3 | 1.1 | 1.4 | 0.9 | 0.9 | 1.2 | 1.3 | 1.0 | 1.3  | 1.2  | 1.0 | 1.0 |
| Not fully vaccinated           | 1.0 | 1.1 | 1.3 | 1.1 | 1.2  | 0.9 | 1.0 | 1.2 | 1.4 | 1.0 | 1.1  | 1.0 | 1.0 | 1.1 | 1.4 | 0.7  | 1.0 | 1.1 | 0.9 | 0.9 | 1.0 | 1.8 | 0.8 | 1.0 | 1.0 | 2.0 | 1.1 | 1.6 | 1.0 | 0.7 | 1.0 | 1.3  | 0.8  | 1.0 | 1.2 |
| Infectious disease             | 1.0 | 1.1 | 1.1 | 1.1 | 1.0  | 1.0 | 1.1 | 0.9 | 1.1 | 1.1 | 0.9  | 1.1 | 0.9 | 1.5 | 1.1 | 0.5  | 1.1 | 0.8 | 0.9 | 1.2 | 1.0 | 1.4 | 1.2 | 1.3 | 0.9 | 2.4 | 0.9 | 0.7 | 1.0 | 0.8 | 0.9 | 1.0  | 0.8  | 1.0 | 1.3 |
| Child marriage                 | 1.1 | 0.9 | 1.1 | 0.9 | 1.1  | 1.2 | 0.9 | 1.0 | 1.1 | 0.9 | 1.0  | 1.1 | 1.1 | 1.0 | 1.1 | 1.0  | 0.8 | 1.0 | 1.0 | 1.0 | 1.2 | 0.6 | 1.0 | 1.1 | 1.0 | 1.3 | 1.0 | 1.3 | 1.0 | 0.8 | 0.8 | 1.1  | 0.8  | 1.1 | 1.2 |
| Delayed breastfeeding          | 1.0 | 1.0 | 1.0 | 1.0 | 0.9  | 1.2 | 1.1 | 1.0 | 0.8 | 0.9 | 1.1  | 1.1 | 1.1 | 1.4 | 1.0 | 1.0  | 1.2 | 1.4 | 1.0 | 0.9 | 1.0 | 1.3 | 0.9 | 1.0 | 0.9 | 1.1 | 1.2 | 1.1 | 0.9 | 0.9 | 0.9 | 1.0  | 0.9  | 1.0 | 1.0 |
| FP need unsatisfied            | 1.2 | 1.0 | 1.0 | 1.1 | 1.0  | 1.0 | 1.1 | 1.2 | 0.7 | 1.0 | 1.1  | 1.0 | 0.9 | 1.4 | 1.2 | 0.6  | 1.1 | 1.2 | 1.1 | 1.0 | 1.1 | 1.2 | 1.0 | 1.0 | 1.0 | 0.6 | 1.2 | 1.3 | 1.1 | 1.0 | 1.0 | 1.0  | 1.0  | 1.0 | 1.0 |
| No vit A supplement            | 0.9 | 0.8 | 1.1 | 1.2 | 1.4  | 1.4 | 0.8 | 1.0 | 1.1 | 1.2 | 0.9  | 1.0 | 0.9 | 1.0 | 0.9 | 0.6  | 1.2 | 1.0 | 1.2 | 0.8 | 1.2 | 1.1 | 1.1 | 1.3 | 1.4 | 1.2 | 1.1 | 1.5 | 0.9 | 0.6 | 0.9 | 1.2  | 0.8  | 0.9 | 1.0 |
| No iodized salt                | 0.9 | 0.8 | 0.9 | 1.4 | 1.5  | 0.9 | 1.0 | 0.8 | 1.1 | 1.0 | 1.0  | 1.0 | 1.0 | 0.8 | 1.3 | 1.2  | 0.6 | 0.9 | 1.1 | 0.9 | 1.1 | 0.6 | 0.7 | 0.9 | 0.9 | 0.6 | 1.4 | 1.5 | 1.0 | 0.8 | 1.1 | 0.9  | 1.0  | 0.8 | 0.8 |
| No care seeking for susp pneu  | 0.9 | 1.1 | 1.0 | 1.0 | 1.2  | 1.3 | 1.0 | 0.8 | 0.6 | 1.0 | 1.2  | 0.9 | 1.0 | 0.6 | 1.0 | 1.5  | 0.8 | 1.1 | 1.2 | 0.8 | 0.9 | 1.0 | 0.8 | 0.6 | 1.0 | 1.0 | 0.8 | 1.3 | 1.0 | 1.0 | 1.0 | 1.0  | 0.7  | 1.0 | 0.9 |

Label: odds ratios

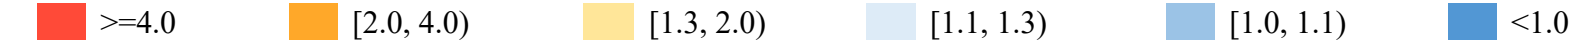

Note:

1. BJ= Benin, BF= Burkina Faso, BI= Burundi, CM=Cameroon, CI=Côte d'Ivoire, CD=The Democratic Republic of the Congo, ET=Ethiopia, GM=Gambia, GH=Ghana, GN=Guinea, HT=Haiti, IN=India, KE=Kenya, KG=Kyrgyzstan, KM=Comoros, LS=Lesotho, LR=Liberia, MW=Malawi, ML=Mali, MZ=Mozambique, MM=Myanmar, NA=Namibia, NP=Nepal, NE=Niger, PE=Peru, ST= São Tomé and Príncipe, SL=Sierra Leone, SZ=Swaziland, TD=Chad, TJ=Tajikistan, TZ=Tanzania, TG=Togo, UG=Uganda, ZM=Zambia, ZW=Zimbabwe.
2. Short maternal stature: maternal height <145cm; low maternal BMI: maternal BMI <18.5 kg/m<sup>2</sup>; child marriage: mother's age at marriage <18 years old; delayed breastfeeding: child was not initially breastfed within one hour after born; infectious disease: child was caught by infectious diseases two weeks prior to the survey.
3. Abbreviations - HH: household, BMI: body mass index; SBA: skilled birth attendant; ANC: antenatal care; ORT: oral rehydration therapy; FP: family planning; vit: vitamin; susp pneu: suspected pneumonia.

**B) Underweight, children 12-59 months old, total n=299,353**

|                                | BJ  | BF  | BI  | CM  | CI   | CD  | ET  | GM  | GH   | GN  | HT  | IN  | KE  | KG  | KM  | LS   | LR  | MW  | ML  | MZ  | MM  | NA  | NP  | NE  | PE   | ST  | SL  | SZ  | TD  | TJ  | TZ  | TG  | UG  | ZM  | ZW  |
|--------------------------------|-----|-----|-----|-----|------|-----|-----|-----|------|-----|-----|-----|-----|-----|-----|------|-----|-----|-----|-----|-----|-----|-----|-----|------|-----|-----|-----|-----|-----|-----|-----|-----|-----|-----|
| Short maternal stature         | 4.2 | 6.1 | 3.7 | 2.6 | 2.4  | 3.3 | 4.0 | 6.3 | 2.4  | 1.5 | 4.9 | 3.4 | 4.9 | 1.0 | 1.8 | 5.4  | 6.4 | 6.5 | 1.2 | 4.1 | 4.2 | 0.2 | 2.7 | 1.6 | 6.0  | 3.0 | 1.9 | 4.6 | 1.1 | 1.7 | 5.9 | 5.4 | 6.8 | 4.3 | 1.4 |
| Lack of maternal education     | 2.4 | 1.7 | 0.7 | 5.6 | 20.7 | 1.7 | 2.6 | 0.9 | 13.2 | 1.7 | 8.4 | 1.8 | 2.2 | 1.0 | 2.9 | 33.5 | 1.0 | 1.8 | 3.7 | 5.7 | 0.7 | 1.2 | 1.4 | 1.5 | 2.8  | 0.5 | 0.8 | 1.9 | 1.5 | 0.9 | 1.3 | 2.4 | 5.5 | 1.6 | 2.2 |
| Poorest HH wealth              | 1.3 | 1.4 | 3.1 | 2.8 | 1.5  | 2.9 | 1.7 | 1.2 | 1.2  | 1.4 | 2.3 | 1.7 | 3.2 | 0.9 | 1.3 | 3.4  | 1.4 | 2.1 | 1.7 | 2.4 | 1.0 | 5.1 | 1.6 | 1.2 | 17.3 | 4.0 | 1.6 | 2.5 | 1.2 | 0.9 | 2.0 | 1.9 | 2.2 | 2.3 | 1.2 |
| Low maternal BMI               | 3.5 | 3.7 | 6.8 | 6.0 | 7.5  | 2.7 | 2.8 | 2.0 | 4.0  | 2.7 | 4.3 | 2.6 | 3.3 | 5.7 | 3.1 | 2.6  | 5.6 | 3.5 | 2.7 | 4.8 | 3.4 | 2.0 | 4.1 | 3.2 | 7.1  | 5.6 | 2.1 | 4.3 | 2.8 | 3.2 | 3.2 | 5.1 | 3.3 | 2.7 | 6.2 |
| Poor dietary diversity         | 1.1 | 1.0 | 1.0 | 3.1 | 1.2  | 1.4 | 2.0 | 1.0 | 1.2  | 1.7 | 0.7 | 1.4 | 0.8 | 1.9 | 1.0 | 0.4  | 1.7 | 1.6 | 1.6 | 1.7 | 1.2 | 0.9 | 1.3 | 1.4 | 0.6  | 0.8 | 1.3 | 0.5 | 1.2 | 1.9 | 1.1 | 1.2 | 1.4 | 0.9 | 0.5 |
| No SBA                         | 1.5 | 1.4 | 1.5 | 1.4 | 0.7  | 1.2 | 1.0 | 1.3 | 1.6  | 1.8 | 1.1 | 1.1 | 1.3 | 1.0 | 1.2 | 1.2  | 1.1 | 1.3 | 1.3 | 0.8 | 1.5 | 1.5 | 1.0 | 1.0 | 1.1  | 1.4 | 1.1 | 1.2 | 1.3 | 1.2 | 0.9 | 1.2 | 1.2 | 1.2 | 1.2 |
| Less than four ANC visits      | 1.2 | 0.1 | 0.8 | 1.9 | 0.5  | 0.4 | 2.1 | 2.2 | 0.9  | 1.7 | 1.5 | 1.1 | 1.3 | 0.8 | 0.9 | 1.0  | 0.9 | 0.6 | 1.0 | 4.2 | 1.6 | 0.8 | 1.2 | 1.0 | 0.8  | 1.1 | 1.5 | 0.2 | 1.4 | 1.5 | 0.8 | 7.8 | 1.6 | 1.9 | 1.2 |
| Had diarrhea, but not used ORT | 1.2 | 1.1 | 1.5 | 1.5 | 1.0  | 1.1 | 1.9 | 1.5 | 0.6  | 1.6 | 1.3 | 1.2 | 1.2 | 1.0 | 1.4 | 2.7  | 1.6 | 1.3 | 1.3 | 1.6 | 0.4 | 3.6 | 0.8 | 1.1 | 1.2  | 3.0 | 1.4 | 2.9 | 1.4 | 1.9 | 1.1 | 1.3 | 1.0 | 0.9 | 0.7 |
| Unsafe stool disposal          | 0.9 | 1.2 | 1.2 | 1.2 | 1.2  | 1.2 | 1.1 | 1.1 | 1.4  | 1.1 | 1.2 | 1.1 | 1.1 | 1.5 | 1.2 | 0.9  | 1.2 | 1.3 | 1.3 | 1.1 | 1.3 | 3.2 | 1.2 | 1.6 | 1.1  | 1.2 | 1.0 | 0.9 | 1.2 | 1.1 | 1.2 | 1.2 | 1.4 | 0.9 | 1.0 |
| Not fully vaccinated           | 1.1 | 1.1 | 1.4 | 1.3 | 1.1  | 1.0 | 1.0 | 0.9 | 1.0  | 1.1 | 1.3 | 1.0 | 1.0 | 0.8 | 1.6 | 0.6  | 0.9 | 1.3 | 1.1 | 1.0 | 1.0 | 1.4 | 0.9 | 1.0 | 1.0  | 1.7 | 1.3 | 1.5 | 1.4 | 0.8 | 1.2 | 1.4 | 0.9 | 1.2 | 0.9 |
| Infectious disease             | 1.3 | 1.2 | 0.8 | 1.1 | 1.6  | 1.2 | 0.9 | 0.6 | 1.5  | 1.0 | 0.7 | 1.0 | 1.0 | 2.0 | 1.0 | 0.5  | 1.1 | 1.1 | 1.1 | 1.3 | 1.5 | 0.2 | 1.4 | 1.5 | 1.1  | 0.7 | 0.9 | 0.7 | 1.0 | 0.7 | 1.2 | 1.0 | 0.7 | 1.3 | 1.2 |
| Child marriage                 | 1.0 | 1.0 | 1.1 | 1.0 | 0.8  | 1.1 | 0.9 | 1.0 | 0.6  | 1.0 | 0.9 | 1.0 | 0.9 | 0.9 | 0.9 | 1.0  | 0.9 | 1.1 | 1.0 | 0.9 | 1.2 | 0.5 | 0.9 | 1.1 | 1.0  | 1.4 | 1.0 | 0.9 | 0.9 | 0.9 | 0.9 | 1.2 | 0.8 | 1.1 | 1.3 |
| Delayed breastfeeding          | 1.0 | 0.9 | 1.2 | 1.0 | 0.6  | 1.0 | 1.0 | 0.8 | 0.7  | 0.9 | 1.2 | 1.0 | 0.9 | 1.0 | 1.2 | 1.2  | 1.3 | 1.2 | 1.0 | 0.9 | 0.9 | 1.5 | 0.9 | 1.0 | 1.1  | 1.2 | 1.1 | 0.9 | 0.8 | 1.0 | 1.0 | 0.9 | 1.1 | 1.1 | 1.0 |
| FP need unsatisfied            | 1.2 | 1.2 | 1.0 | 1.2 | 1.1  | 0.8 | 1.0 | 1.0 | 0.8  | 1.1 | 1.1 | 1.0 | 1.0 | 1.1 | 1.5 | 0.7  | 1.4 | 1.0 | 1.0 | 1.0 | 0.8 | 1.0 | 0.9 | 1.0 | 0.9  | 0.7 | 1.2 | 1.8 | 1.0 | 1.0 | 1.3 | 1.2 | 0.9 | 1.0 | 1.4 |
| No vit A supplement            | 1.1 | 0.9 | 1.2 | 1.2 | 1.2  | 1.1 | 0.8 | 1.2 | 1.0  | 1.6 | 1.1 | 1.0 | 0.9 | 1.3 | 1.0 | 0.6  | 0.9 | 0.8 | 1.0 | 1.0 | 1.0 | 1.2 | 1.1 | 1.3 | 1.5  | 2.7 | 1.0 | 0.7 | 0.8 | 0.8 | 0.9 | 1.0 | 1.1 | 0.9 | 0.7 |
| No iodized salt                | 0.9 | 1.0 | 1.9 | 1.2 | 1.6  | 1.8 | 1.2 | 0.7 | 1.3  | 1.3 | 1.5 | 0.9 | 0.7 | 0.9 | 0.6 | 0.8  | 0.3 | 1.1 | 1.0 | 0.9 | 0.8 | 0.6 | 1.2 | 0.9 | 1.5  | 1.2 | 1.2 | 0.9 | 0.9 | 1.1 | 1.3 | 0.9 | 1.0 | 0.9 | 1.6 |
| No care seeking for susp pneu  | 1.0 | 0.9 | 1.3 | 1.0 | 0.9  | 1.2 | 1.0 | 1.2 | 0.7  | 1.0 | 1.6 | 0.9 | 1.0 | 0.9 | 0.7 | 0.7  | 0.8 | 0.8 | 1.4 | 1.2 | 0.7 | 4.8 | 0.9 | 0.6 | 1.0  | 1.0 | 1.4 | 0.9 | 1.0 | 1.0 | 1.0 | 0.7 | 0.8 | 1.0 | 0.9 |

Label: odds ratios

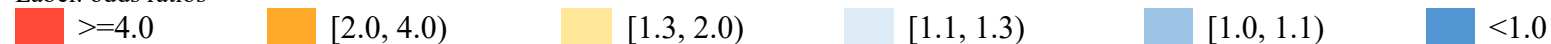

**C) Wasting, children 12-59 months old, total n=299,353**

|                                | BJ  | BF  | BI   | CM  | CI  | CD  | ET  | GM   | GH   | GN  | HT  | IN  | KE  | KG   | KM  | LS  | LR  | MW  | ML  | MZ  | MM  | NA  | NP  | NE  | PE   | ST  | SL  | SZ   | TD  | TJ  | TZ  | TG  | UG  | ZM  | ZW  |
|--------------------------------|-----|-----|------|-----|-----|-----|-----|------|------|-----|-----|-----|-----|------|-----|-----|-----|-----|-----|-----|-----|-----|-----|-----|------|-----|-----|------|-----|-----|-----|-----|-----|-----|-----|
| Short maternal stature         | 2.0 | 1.4 | 0.5  | 1.3 | 1.0 | 1.8 | 1.7 | 1.0  | 1.0  | 0.9 | 0.7 | 1.2 | 1.0 | 1.0  | 1.5 | 0.3 | 5.1 | 8.9 | 0.0 | 2.7 | 0.6 | 1.0 | 0.5 | 3.2 | 2.2  | 0.4 | 0.2 | 1.0  | 5.4 | 1.0 | 2.0 | 2.2 | 2.6 | 1.4 | 3.5 |
| Lack of maternal education     | 1.0 | 1.7 | 0.1  | 1.5 | 3.6 | 4.1 | 1.8 | 1.3  | 34.1 | 1.6 | 7.0 | 1.2 | 3.7 | 1.1  | 1.5 | 1.0 | 1.0 | 0.2 | 2.5 | 1.9 | 0.6 | 5.2 | 2.0 | 0.9 | 1.0  | 1.3 | 1.8 | 0.2  | 1.4 | 0.6 | 1.2 | 1.5 | 0.4 | 0.6 | 1.0 |
| Poorest HH wealth              | 0.5 | 0.9 | 2.2  | 4.4 | 1.1 | 1.6 | 1.9 | 0.6  | 0.3  | 0.7 | 1.5 | 1.3 | 2.9 | 1.0  | 1.5 | 1.9 | 1.0 | 0.7 | 1.2 | 2.1 | 1.2 | 4.7 | 0.7 | 1.7 | 2.6  | 0.8 | 0.9 | 12.3 | 0.9 | 0.5 | 0.6 | 3.7 | 4.0 | 1.8 | 2.4 |
| Low maternal BMI               | 5.7 | 2.7 | 16.6 | 2.0 | 3.1 | 1.3 | 3.7 | 3.2  | 2.5  | 2.0 | 2.8 | 2.3 | 1.5 | 2.8  | 1.3 | 1.2 | 2.6 | 3.0 | 2.7 | 1.9 | 2.1 | 1.6 | 2.7 | 2.9 | 11.8 | 1.1 | 2.2 | 48.9 | 4.7 | 3.4 | 2.5 | 4.4 | 5.8 | 1.2 | 3.7 |
| Poor dietary diversity         | 1.0 | 4.5 | 0.6  | 2.4 | 0.9 | 1.1 | 1.7 | 1.7  | 0.2  | 4.6 | 0.6 | 1.2 | 0.7 | 0.8  | 2.2 | 3.5 | 2.0 | 1.9 | 0.8 | 1.7 | 1.4 | 0.2 | 2.2 | 1.0 | 0.6  | 0.7 | 2.0 | 1.5  | 1.1 | 1.0 | 1.7 | 0.6 | 0.8 | 1.1 | 2.6 |
| No SBA                         | 1.2 | 1.0 | 1.5  | 2.3 | 0.6 | 1.8 | 1.3 | 1.0  | 1.5  | 1.7 | 1.0 | 1.0 | 1.2 | 1.0  | 0.7 | 2.0 | 1.0 | 1.3 | 1.0 | 0.5 | 1.2 | 1.2 | 1.0 | 0.8 | 1.3  | 1.0 | 1.2 | 0.2  | 1.0 | 0.9 | 1.2 | 1.2 | 1.0 | 1.6 | 0.6 |
| Less than four ANC visits      | 0.6 | 0.6 | 1.0  | 0.5 | 0.3 | 0.7 | 2.7 | 14.0 | 2.7  | 6.9 | 1.4 | 0.9 | 2.1 | 0.3  | 0.7 | 0.3 | 1.0 | 0.9 | 1.1 | 0.4 | 1.3 | 2.5 | 1.0 | 0.7 | 0.9  | 4.8 | 1.2 | 0.1  | 1.5 | 2.2 | 0.5 | 0.3 | 0.5 | 2.5 | 1.1 |
| Had diarrhea, but not used ORT | 1.6 | 1.4 | 1.7  | 1.5 | 0.7 | 1.0 | 1.5 | 1.0  | 2.1  | 1.5 | 0.8 | 1.0 | 1.8 | 1.0  | 1.4 | 1.0 | 1.9 | 1.1 | 1.1 | 0.9 | 0.6 | 1.5 | 1.4 | 1.4 | 1.4  | 1.3 | 1.8 | 1.0  | 1.3 | 2.7 | 0.5 | 0.9 | 0.5 | 1.2 | 0.6 |
| Unsafe stool disposal          | 0.7 | 1.8 | 1.0  | 0.8 | 1.0 | 0.8 | 1.2 | 1.3  | 0.7  | 0.7 | 1.4 | 1.0 | 1.4 | 0.7  | 1.4 | 0.4 | 1.0 | 0.8 | 1.1 | 1.2 | 1.3 | 3.0 | 1.7 | 1.4 | 0.9  | 1.8 | 1.4 | 1.6  | 1.4 | 1.3 | 1.3 | 0.7 | 0.9 | 0.8 | 0.7 |
| Not fully vaccinated           | 1.3 | 0.8 | 1.3  | 1.4 | 0.7 | 0.9 | 0.9 | 0.8  | 0.5  | 0.8 | 1.3 | 1.0 | 1.1 | 1.6  | 1.3 | 2.5 | 0.9 | 1.3 | 1.0 | 1.4 | 0.9 | 0.8 | 0.9 | 1.1 | 1.7  | 1.1 | 1.0 | 0.8  | 1.3 | 1.0 | 1.6 | 1.2 | 0.6 | 1.0 | 0.6 |
| Infectious disease             | 1.2 | 1.0 | 1.1  | 1.0 | 2.0 | 1.4 | 0.8 | 0.7  | 0.3  | 0.9 | 0.7 | 1.0 | 0.8 | 0.0  | 0.7 | 0.1 | 0.6 | 2.0 | 1.3 | 1.4 | 1.0 | 0.3 | 1.6 | 0.8 | 1.5  | 0.7 | 1.1 | 1.7  | 0.9 | 0.7 | 1.9 | 1.0 | 0.9 | 1.0 | 1.1 |
| Child marriage                 | 1.1 | 1.0 | 1.4  | 0.8 | 1.3 | 0.9 | 1.1 | 0.9  | 1.0  | 0.8 | 0.6 | 1.0 | 0.8 | 1.4  | 0.8 | 0.6 | 0.6 | 1.3 | 0.9 | 0.7 | 1.0 | 1.3 | 0.9 | 1.0 | 1.1  | 1.3 | 1.2 | 0.3  | 1.1 | 1.2 | 0.8 | 1.5 | 0.9 | 1.2 | 1.1 |
| Delayed breastfeeding          | 1.0 | 0.9 | 1.1  | 1.5 | 0.6 | 0.9 | 0.9 | 1.0  | 0.7  | 0.6 | 1.4 | 0.9 | 0.9 | 0.5  | 0.8 | 0.9 | 1.2 | 0.8 | 1.2 | 1.0 | 1.3 | 3.7 | 1.1 | 0.9 | 1.1  | 1.4 | 0.9 | 2.1  | 1.2 | 1.5 | 1.2 | 1.1 | 0.9 | 0.9 | 0.7 |
| FP need unsatisfied            | 1.0 | 1.2 | 1.0  | 1.3 | 0.8 | 0.8 | 0.8 | 0.9  | 0.8  | 0.8 | 1.2 | 1.0 | 0.9 | 1.0  | 1.4 | 0.2 | 0.9 | 1.1 | 0.8 | 0.7 | 0.7 | 0.4 | 0.9 | 1.0 | 1.2  | 1.0 | 1.3 | 2.5  | 0.8 | 0.9 | 1.1 | 0.9 | 0.7 | 1.1 | 0.3 |
| No vit A supplement            | 1.3 | 1.3 | 1.0  | 0.9 | 0.7 | 1.2 | 0.7 | 1.3  | 1.5  | 1.2 | 1.4 | 1.0 | 1.1 | 2.4  | 1.1 | 2.2 | 1.3 | 0.8 | 0.7 | 1.7 | 0.5 | 0.4 | 0.6 | 1.3 | 0.5  | 3.2 | 0.8 | 1.3  | 0.9 | 0.9 | 1.0 | 1.3 | 0.7 | 1.1 | 0.5 |
| No iodized salt                | 1.3 | 0.6 | 2.2  | 0.9 | 0.8 | 0.8 | 1.1 | 0.8  | 1.0  | 1.2 | 1.6 | 1.0 | 0.5 | 1.0  | 0.5 | 0.3 | 0.1 | 3.7 | 0.9 | 1.0 | 0.8 | 0.5 | 2.5 | 0.8 | 0.6  | 4.1 | 0.7 | 1.0  | 0.7 | 1.5 | 1.1 | 0.9 | 1.4 | 1.5 | 2.3 |
| No care seeking for susp pneu  | 1.7 | 1.2 | 1.2  | 1.0 | 1.1 | 0.9 | 1.0 | 1.9  | 2.5  | 1.0 | 0.8 | 0.9 | 1.0 | 10.9 | 1.0 | 3.9 | 2.7 | 0.7 | 1.3 | 0.9 | 1.1 | 5.1 | 1.3 | 1.0 | 1.0  | 1.0 | 1.4 | 0.3  | 1.0 | 1.0 | 1.0 | 0.8 | 1.1 | 1.0 | 1.0 |

Label: odds ratios

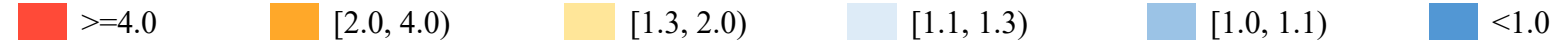



**Figure 19. Relative Ranking of 23 Factors Associated With Child Anthropometric Failures From Fully Adjusted Models for the Pooled Sample, Adding Women’s Empowerment Factors (n=128,902)**

**A) stunting, B) underweight, and C) wasting, odds ratio (OR) and 95% confidence interval (CI)**

**A) Stunting**

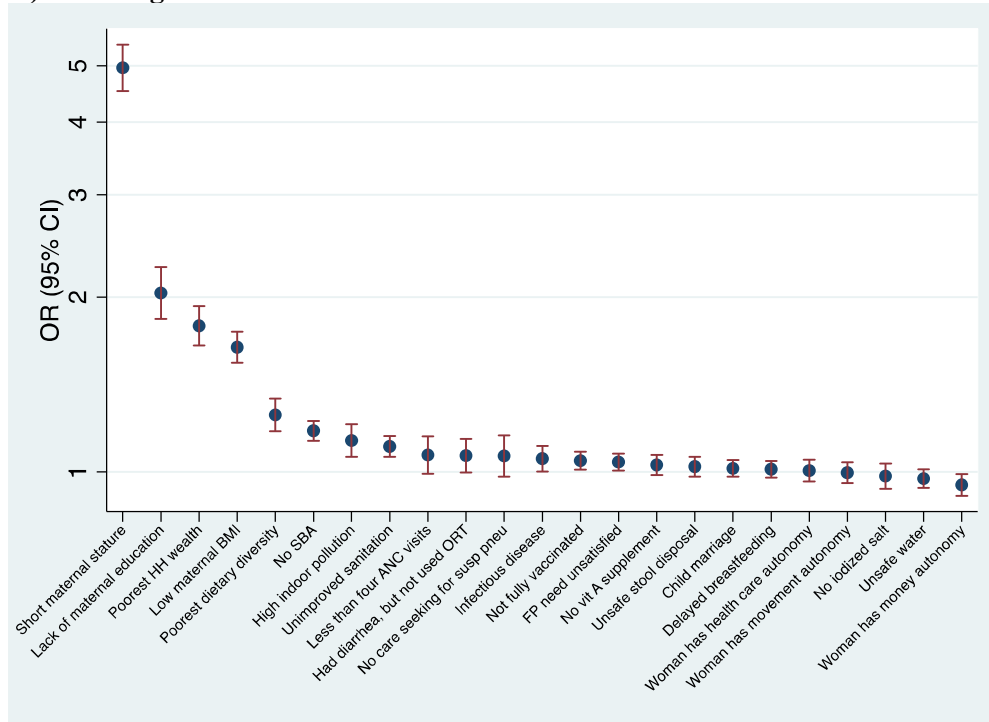

**Note:**

1. We use logarithmic scale for the y axis.
2. Short maternal stature: maternal height <145cm; low maternal BMI: maternal BMI <18.5 kg/m<sup>2</sup>; child marriage: mother’s age at marriage <18 years old; delayed breastfeeding: child was not initially breastfed within one hour after born; infectious disease: child was caught by infectious diseases two weeks prior to the survey.
3. Abbreviations - HH: household, BMI: body mass index; SBA: skilled birth attendant; ANC: antenatal care; ORT: oral rehydration therapy; FP: family planning; vit: vitamin; susp pneu: suspected pneumonia.

## B) Underweight

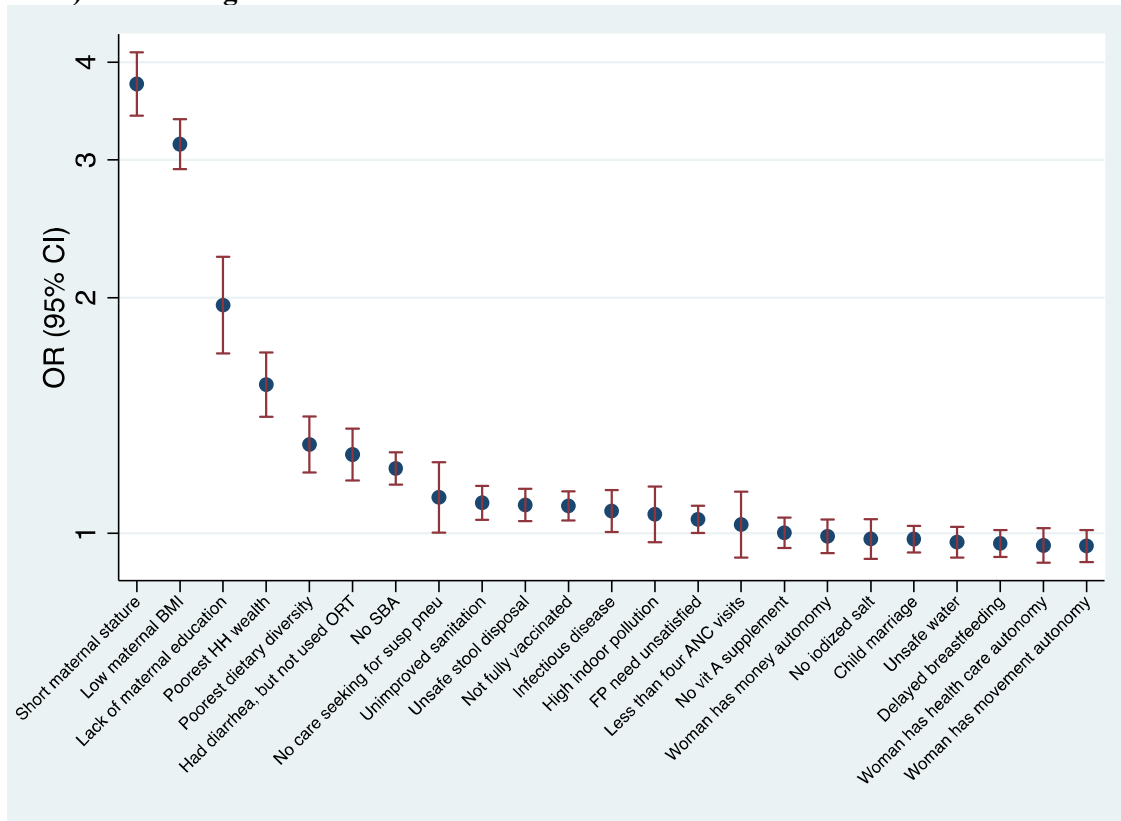

### C) Wasting

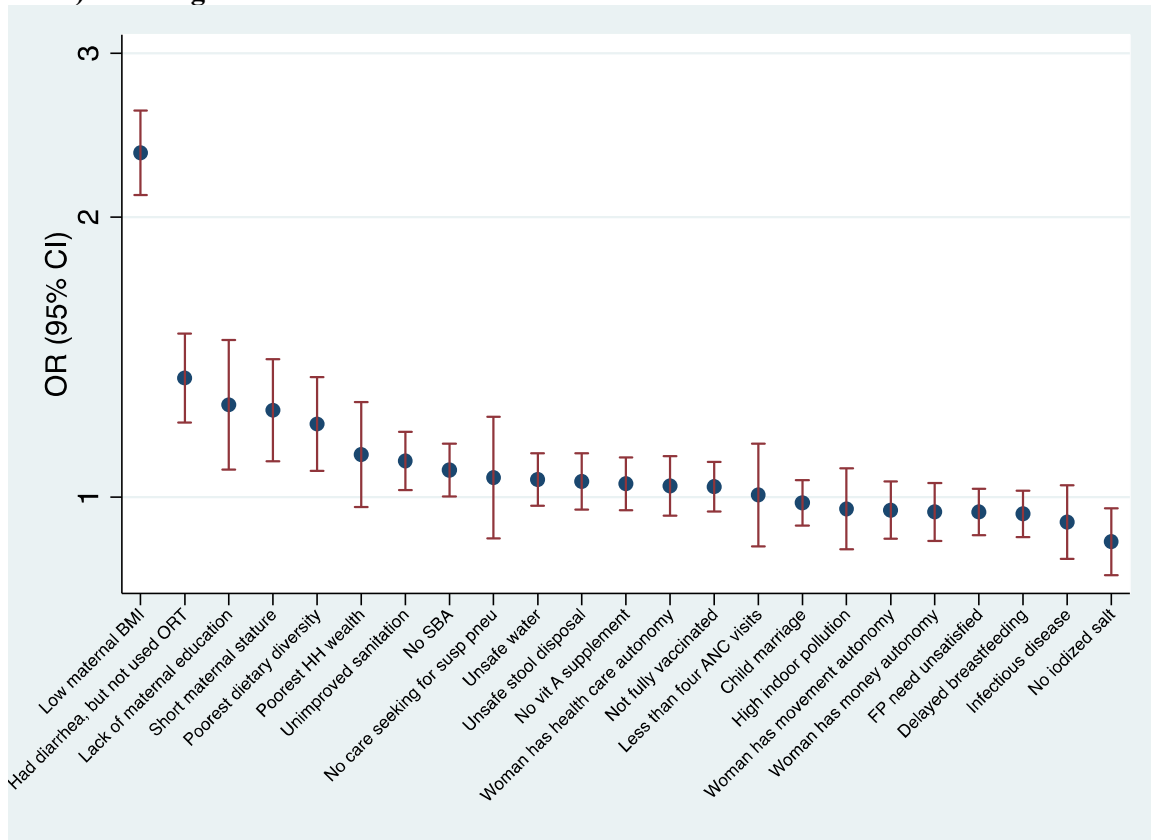

Supplement: jamanetwopen-3-e203386-s001.pdf [file jamanetwopen-3-e203386-s001.pdf]
